# Supplementary material for: TFAP2 transcription factors are regulators of lipid droplet biogenesis
Source: eLife. 2018 Sep 26;7:e36330. doi: 10.7554/eLife.36330 (PMC6170152; doi:10.7554/eLife.36330)
Supplement: Figure 1—source data 1. [file elife-36330-fig1-data1.xlsx]

## Sheet: Control
TABLE S1
Compound Name	CAS	Putative Target	Lipid Droplets 1µM Control Media (zScore)	Lipid Droplets 10µM Control Media (zScore)
Pyrvinium pamoate	3546-41-6	GSK3	0.569293	3.46418
BML-284	853220-52-7	ß-catenin	2.41959	3.41731
Doxorubicin·HCl	25316-40-9	LRP5/6	1.75788	3.02198
WAY-262611	1123231-07-1	DKK1	0.591781	2.25181
Forskolin	66575-29-9	cAMP/PKA	1.97001	2.06936
Niclosamide	50-65-7	LRP5/6	-0.611109	1.80897
BML-285 (Diaminoquinazoline)	1039732-09-6	ß-catenin	-0.237989	1.47033
Bafilomycin A1 (1/10 concentration)	88899-55-2	vATPase	1.8643	1.42466
BIO	667463-62-9	GSK3	-1.56603	1.3992
PGE2	363-24-6	cAMP/PKA	0.479009	1.33249
Bosutinib	380843-75-4	ß-catenin	-0.430125	1.29328
Decitabine	2353-33-5	DKK1	1.5524	1.23679
Retinoic Acid	302-79-4	TCF/LEF	0.671815	0.995693
Hexachlorophene	70-30-4	ß-catenin	-0.344724	0.952241
Harmine·HCl	343-27-1	TCF/LEF	0.489805	0.644698
Rosiglitazone maleate	155141-29-0	PPARG	0.103068	0.43973
Riluzole	1744-22-5	GRM1	0.543952	0.416526
D4476	301836-43-1	CK1	-0.861665	0.402664
CHIR99021	252917-06-9	GSK3	-0.210355	0.391361
Sodium Deoxycholic acid	302-95-4	ß-catenin	-0.1181	0.348803
Curcumin	458-37-7	ß-catenin	-0.0788791	0.339884
PNU-74654	113906-27-7	ß-catenin	0.219838	0.309835
Kenpaullone	142273-20-9	GSK3	0.164799	0.290189
LY456236·HCl	338738-57-1	GRM1	0.950421	0.25539
ICG-001	780757-88-2	CREBBP	0.06224	0.240685
FH-535	108409-83-2	ß-catenin	-0.371454	0.20402
Flavanone	487-26-3	TCF/LEF	-0.169789	0.190065
Sulindac	38194-50-2	Dishevelled	0.157476	0.188656
BML286 (3289-8625)	294891-81-9	Dishevelled	-0.022442	0.174167
TWS-119	601514-19-6	GSK3	-0.576129	0.111544
EGCG	989-51-5	HBP1	-0.0673922	0.102127
Quercetin	117-39-5	ß-catenin	-0.110966	0.0668505
(-)-Terreic acid	121-40-4	BTK	0.165566	0.01242
Troglitazone	97322-87-7	PPARG	0.364306	-0.00252631
Val-Val-Val	28130-13-4	Dishevelled	-0.149711	-0.060062
Sodium valproate	1069-66-5	GSK3	-0.0164027	-0.110463
Box5	n/a	Wnt5a	-0.136278	-0.114115
IWR-1	1127442-82-3	Axin	-0.228501	-0.120926
GW9662	22978-25-2	PPARG	0.586005	-0.129761
JS-K	205432-12-8	ß-catenin	-0.525238	-0.134713
Diclofenac·Na	15307-79-6	COX-2	-0.361052	-0.185201
NO-ASA	175033-36-0	ß-catenin	-0.0789456	-0.193245
Resveratrol	501-36-0	GSK3	0.724755	-0.211506
Apigenin	520-36-5	CK2	-0.632225	-0.239802
CCT036477	305372-78-5	ß-catenin	-0.324859	-0.25185
Ellagic Acid	476-66-4	CK2	-0.182306	-0.287213
IWP-2	686770-61-6	Porcupine	-0.266817	-0.337085
TNP-470	129298-91-5	PCP Pathway	-0.151627	-0.350217
Exifone	52479-85-3	DKK1	0.093759	-0.35985
Purpurogallin	569-77-7	DKK1	-0.00636755	-0.363942
Cardamonin	19309-14-9	ß-catenin	-0.0873275	-0.370139
Carnosol	5957-80-2	ß-catenin	-0.176697	-0.468031
Gallic acid	149-91-7	DKK1	-0.0153955	-0.469765
XAV939	284028-89-3	Axin	-0.623432	-0.491624
DHA	6217-54-5	ß-catenin	0.0621025	-0.517472
EPA	10417-94-4	ß-catenin	-0.538954	-0.534936
Pterostilbene	537-42-8	ß-catenin	-0.142503	-0.58496
Imatinib mesylate	220127-57-1	ß-catenin	-2.04245	-0.588476
NCI16221	81-78-7	LRP5/6	0.926711	-0.609479
SB-216763	280744-09-4	GSK3	-0.155262	-0.612305
Genistein	446-72-0	Tyr kinases	0.598588	-0.741613
Sulindac Sulfide	32004-67-4	COX-2	-0.509514	-0.742684
Usnic acid	125-46-2	LRP5/6	-0.491373	-0.845905
Diarylsulfonesulfonamide	915754-05-1	sFRP-1	-0.474081	-0.879737
Celecoxib	169590-42-5	COX-2	-0.79385	-0.900295
QS-11	944328-88-5	ARFGAP1	-0.625439	-1.04583
Anandamide	94421-68-8	Wnt5a	-0.505947	-1.0623
Thalidomide	50-35-1	DKK1	0.816246	-1.06856
IM-12	1129669-05-1	GSK3	-0.406902	-1.07568
AR-A014418	487021-52-3	GSK3	-0.383504	-1.11986
Trichostatin A	58880-19-6	DKK1	-0.835458	-1.22072
PP2	172889-27-9	Src kinases	0.174165	-1.91686
IQ1	331001-62-8	PP2A	-0.699573	-2.14911

## Sheet: Wnt3a
Compound Name	CAS	Putative Target	Lipid Droplets 1µM Wnt3a Media (zScore)	Lipid Droplets 10µM Wnt3a Media (zScore)
Trichostatin A	58880-19-6	DKK1	-5.16494	-6.44972
Bosutinib	380843-75-4	ß-catenin	-1.17671	-4.15498
Hexachlorophene	70-30-4	ß-catenin	-0.377005	-1.6789
WAY-262611	1123231-07-1	DKK1	0.122504	-1.46181
Imatinib mesylate	220127-57-1	ß-catenin	-1.01455	-1.46075
Niclosamide	50-65-7	LRP5/6	0.236305	-1.44464
PP2	172889-27-9	Src kinases	-0.824144	-1.23142
TWS-119	601514-19-6	GSK3	-0.0471988	-1.12805
BIO	667463-62-9	GSK3	-0.117775	-0.889258
FH-535	108409-83-2	ß-catenin	0.160196	-0.779379
Doxorubicin·HCl	25316-40-9	LRP5/6	0.540235	-0.703338
D4476	301836-43-1	CK1	-0.0240963	-0.683923
Apigenin	520-36-5	CK2	-0.215564	-0.532555
Rosiglitazone maleate	155141-29-0	PPARG	-0.408495	-0.297588
Genistein	446-72-0	Tyr kinases	-0.18382	-0.271497
BML-285 (Diaminoquinazoline)	1039732-09-6	ß-catenin	0.075875	-0.230607
Troglitazone	97322-87-7	PPARG	-0.134107	-0.218024
Quercetin	117-39-5	ß-catenin	-0.0329645	-0.21349
Curcumin	458-37-7	ß-catenin	-0.0385386	-0.173405
Celecoxib	169590-42-5	COX-2	0.187417	-0.165685
Decitabine	2353-33-5	DKK1	-0.192101	-0.159594
Purpurogallin	569-77-7	DKK1	0.262192	-0.123715
IQ1	331001-62-8	PP2A	0.460172	-0.0879288
Pterostilbene	537-42-8	ß-catenin	-0.343498	-0.0571135
IWR-1	1127442-82-3	Axin	-0.0927208	-0.027364
EPA	10417-94-4	ß-catenin	-0.478999	0.0228441
Exifone	52479-85-3	DKK1	0.191352	0.0250301
Ellagic Acid	476-66-4	CK2	-0.133728	0.0296299
NCI16221	81-78-7	LRP5/6	-0.265908	0.0357449
Kenpaullone	142273-20-9	GSK3	0.289517	0.0373487
Harmine·HCl	343-27-1	TCF/LEF	0.116564	0.0981663
Pyrvinium pamoate	3546-41-6	GSK3	-2.69074	0.0982353
QS-11	944328-88-5	ARFGAP1	0.189104	0.0987173
Sulindac Sulfide	32004-67-4	COX-2	0.181486	0.0989119
Thalidomide	50-35-1	DKK1	-0.299171	0.103186
JS-K	205432-12-8	ß-catenin	-0.28337	0.111527
Bafilomycin A1 (1/10 concentration)	88899-55-2	vATPase	-0.0558335	0.124953
Sulindac	38194-50-2	Dishevelled	-0.194237	0.129126
Usnic acid	125-46-2	LRP5/6	-0.230561	0.15302
EGCG	989-51-5	HBP1	-0.133283	0.157186
Retinoic Acid	302-79-4	TCF/LEF	-0.309382	0.168165
Diclofenac·Na	15307-79-6	COX-2	0.289909	0.182801
LY456236·HCl	338738-57-1	GRM1	0.189114	0.187783
BML286 (3289-8625)	294891-81-9	Dishevelled	0.2341	0.190923
Resveratrol	501-36-0	GSK3	0.102749	0.214634
ICG-001	780757-88-2	CREBBP	0.187194	0.216803
IWP-2	686770-61-6	Porcupine	0.0488227	0.231674
Gallic acid	149-91-7	DKK1	0.337046	0.233858
XAV939	284028-89-3	Axin	0.161732	0.243443
DHA	6217-54-5	ß-catenin	-0.254434	0.267613
Cardamonin	19309-14-9	ß-catenin	-0.0882391	0.269608
CCT036477	305372-78-5	ß-catenin	0.0751497	0.280676
Val-Val-Val	28130-13-4	Dishevelled	0.258272	0.293904
Box5	n/a	Wnt5a	0.248466	0.306934
NO-ASA	175033-36-0	ß-catenin	0.0384347	0.308321
Sodium valproate	1069-66-5	GSK3	0.274169	0.371635
TNP-470	129298-91-5	PCP Pathway	0.223484	0.393852
Flavanone	487-26-3	TCF/LEF	-0.00812408	0.409457
AR-A014418	487021-52-3	GSK3	0.373245	0.423957
Sodium Deoxycholic acid	302-95-4	ß-catenin	0.172829	0.460664
Riluzole	1744-22-5	GRM1	0.270178	0.540853
SB-216763	280744-09-4	GSK3	-0.257859	0.594034
(-)-Terreic acid	121-40-4	BTK	0.126107	0.607433
PNU-74654	113906-27-7	ß-catenin	0.117562	0.63811
IM-12	1129669-05-1	GSK3	0.361121	0.664054
Anandamide	94421-68-8	Wnt5a	0.314316	0.710533
Forskolin	66575-29-9	cAMP/PKA	0.782001	0.811199
Diarylsulfonesulfonamide	915754-05-1	sFRP-1	0.388957	0.821102
GW9662	22978-25-2	PPARG	0.157523	0.840804
PGE2	363-24-6	cAMP/PKA	0.324882	0.841564
CHIR99021	252917-06-9	GSK3	0.494031	0.897989
BML-284	853220-52-7	ß-catenin	0.657795	0.902105
Carnosol	5957-80-2	ß-catenin	-0.00703857	0.927056
