# Supplementary material for: TFAP2 transcription factors are regulators of lipid droplet biogenesis
Source: eLife. 2018 Sep 26;7:e36330. doi: 10.7554/eLife.36330 (PMC6170152; doi:10.7554/eLife.36330)
Supplement: Figure 2—source data 1. [file elife-36330-fig2-data1.xlsx]

## Sheet: siRNA Screen - TFs
TABLE S2
Official Gene Symbol	Cholesterol (z score)	LBPA (z score)
STAT1	3.07142	1.15851
GLI3	2.75328	-5.48164
TGIF1	2.66555	0.980161
SMARCC1	2.47851	1.2733
ETV4	2.4215	1.41197
ARNT2	2.20813	0.262384
EN1	2.12075	1.39911
TFAP2B	2.10984	2.27253
KDM3A	2.10919	0.00831946
SIX2	2.06478	1.33707
MACC1	1.88444	0.491876
PITX3	1.85022	0.0938844
ELF3	1.82288	1.82243
CNBP	1.8023	1.73453
JDP2	1.78693	0.314835
ASCL2	1.77305	2.69645
STAT3	1.73148	1.28638
SP3	1.70139	0.27044
ATF2	1.65853	1.94388
ATF5	1.65225	-0.0117151
YY1	1.64714	1.8745
SKIL	1.59636	0.98968
TP53	1.58479	1.21311
SOX9	1.57442	0.0540367
TFAM	1.55965	3.15114
CXXC1	1.55064	1.76256
SIN3A	1.52309	1.1903
ETV5	1.50626	1.42909
HIVEP1	1.49658	1.72385
DLX4	1.49396	1.02907
HELT	1.48837	1.72792
GBX2	1.48534	0.424487
IRF2	1.40332	2.72457
DPF2	1.40153	-0.218435
BACH2	1.38663	0.913482
NR3C1	1.37405	0.191702
HOXD13	1.35836	1.2738
RELA	1.35096	1.82309
EZH2	1.32051	0.920649
MYC	1.29915	0.334762
SNAI1	1.29485	0.492081
UHRF1	1.26164	0.921254
NPAS4	1.24774	1.31985
NR1H4	1.2461	1.38347
MEIS2	1.23992	1.40194
GZF1	1.23463	0.767806
RORA	1.22631	0.372481
SMAD1	1.21328	0.309183
DMRT2	1.21127	3.39735
MAZ	1.18925	-1.14766
RBBP4	1.1839	-0.171747
SOX8	1.18059	1.46136
SMARCB1	1.17471	0.908949
HES2	1.17148	0.41852
ENO1	1.13379	0.907764
SLC2A4RG	1.13317	-0.162281
MSX1	1.12051	-0.115738
GLI1	1.11913	0.295333
ESRRA	1.11184	-0.417331
HNF1A	1.09293	0.726106
DLX5	1.08743	0.430217
ESX1	1.06421	0.938752
CEBPE	1.06063	1.13444
E4F1	1.05778	0.205408
FOSL2	1.05081	1.20227
NFATC3	1.04455	0.775237
ZBTB7A	1.0417	0.281232
NR6A1	1.03466	1.16278
PPARG	1.03445	0.0750904
PKNOX2	1.03419	-0.237751
MEOX2	1.03399	1.00996
SMARCE1	0.985329	0.863931
H3F3A	0.983574	-0.122081
HOXA10	0.959809	0.271781
SIX3	0.951511	0.641552
GATA1	0.951394	0.967621
NFX1	0.938192	1.58136
CREB3L2	0.906965	1.08653
ZFHX3	0.900997	-0.0229075
HAND1	0.898536	3.8937
TXK	0.892371	1.11893
PROP1	0.888076	1.5613
SOX13	0.885165	0.624299
RORB	0.87697	1.20986
LMX1A	0.873228	0.509323
SALL1	0.850001	-0.0877364
SSBP3	0.839125	1.8728
BTBD8	0.836287	0.479599
ARHGAP35	0.835407	1.39952
ESR2	0.834007	0.0324859
MESP2	0.829853	0.499214
GCFC2	0.828854	0.168797
EOMES	0.828118	0.397431
NKX3-1	0.826479	0.00599888
PURB	0.816536	0.449284
INSM1	0.816289	0.868933
KLF12	0.794459	0.841718
NFIC	0.788886	0.532214
NME1	0.788538	0.727484
PIH1D1	0.786442	0.994964
MXD1	0.773578	-0.176071
SOX21	0.761362	0.529583
IFI16	0.752392	-0.363607
GABPA	0.726973	0.0374179
TCF3	0.722917	0.375669
ACTL6A	0.711042	0.637887
EGR1	0.710025	-0.24066
FEZF1	0.709355	0.0156219
FOS	0.706292	0.219939
KLF3	0.705441	-0.12857
RFX4	0.704098	2.16694
LHX2	0.70263	0.396301
CRY1	0.691914	1.84127
CIART	0.691528	0.531874
CDX1	0.688228	1.67521
KLF16	0.679152	-0.694262
RUNX3	0.677321	1.49864
MYPOP	0.66599	0.871173
HOXA5	0.6639	0.840588
RUNX2	0.658627	0.321464
HOXB3	0.655285	2.06383
ZNF335	0.649351	0.0234293
MXD3	0.635459	-0.733199
KLF7	0.63118	0.559229
ZIC1	0.629594	1.13654
PHF21B	0.627664	1.15048
TP73	0.625252	0.667107
MYBL1	0.624424	0.0356001
AGO1	0.622437	0.0966955
ELK4	0.618071	-0.854235
MEF2A	0.617277	0.588996
PHOX2A	0.61116	0.329948
UBTF	0.605681	-0.234256
BARHL2	0.604858	-0.945218
POU2F1	0.602661	0.521224
NKX3-2	0.601176	0.480713
PSPC1	0.57307	-0.318057
HHEX	0.568527	0.330458
FERD3L	0.565214	-0.0539127
WBP2	0.564683	-0.198408
NR1I3	0.558364	0.552568
POU5F1	0.54782	-0.394772
TOX2	0.541703	-0.454481
MAFK	0.540708	1.09674
MBD2	0.533107	-0.317558
CHD4	0.528635	1.23904
YBX1	0.527531	1.72299
STAT6	0.519324	0.602109
FOXC1	0.519069	-0.442974
NRF1	0.518626	-0.687235
MTF1	0.518388	0.505
FOXK1	0.517634	0.764999
FOSB	0.494135	0.427188
TMSB4X	0.491562	0.0100338
SIX1	0.485277	-0.261811
KAT2B	0.484111	0.22655
RFX7	0.480078	-0.340803
HOXA7	0.471393	2.24647
EBF2	0.469406	-1.1465
MED12	0.469374	1.40797
MED1	0.463304	-0.538053
CUX2	0.459236	0.292517
CDK9	0.456953	1.20517
KLF1	0.455415	0.384359
H2AFY	0.449647	0.0578881
SIRT1	0.444478	0.110376
MYOD1	0.44123	-0.345188
PDX1	0.439623	-1.65458
NEUROG3	0.439229	0.335833
LMO4	0.437483	0.0660444
SRF	0.436272	1.50464
E2F3	0.430349	0.737415
ARID3B	0.427456	-0.473119
KCNIP3	0.424087	0.142064
ZMYND11	0.421907	0.194432
PER2	0.418322	0.92443
GATA5	0.407661	-0.0271824
KDM3B	0.406481	-0.77446
CARF	0.404373	-0.735023
PLAG1	0.403704	0.533427
IER2	0.40157	-0.463959
HES6	0.399367	-0.0825566
NFE2	0.395023	-0.860258
PAX9	0.39418	0.293933
THAP11	0.388696	-0.670236
RELB	0.388482	0.484706
BHLHA15	0.388169	-0.41064
FOXN4	0.378352	0.122828
ESRRB	0.373884	-0.261113
NR4A2	0.373878	1.26219
HOXB1	0.368023	0.655062
HEYL	0.364666	0.031344
SOX18	0.358928	-0.319648
RAX	0.356525	-0.426301
MEF2C	0.349616	-0.548667
ZBTB4	0.346669	0.203193
TFAP4	0.346532	-0.560214
HOXD9	0.345631	1.13244
GATA3	0.34393	-0.0365421
CREB3L4	0.33643	-0.398957
NFIA	0.328868	1.01256
ASCL1	0.328105	0.878314
SNAI3	0.327371	-0.563064
EED	0.324861	0.00123322
PHF12	0.324856	-0.776505
ZNF658	0.314326	0.700851
ATF6	0.303297	0.618284
DDRGK1	0.302851	-0.824982
FOXD3	0.301323	1.46261
CEBPG	0.300416	-0.367949
CREB3	0.297126	-0.943964
FOXD1	0.296108	0.336917
E2F7	0.286916	0.370075
RFX6	0.286224	0.509815
RARB	0.285415	-0.0449051
PHF20	0.28435	-0.0205648
MIXL1	0.28388	0.394944
PER1	0.279548	0.0572734
ESR1	0.276393	0.416869
NCOA2	0.271914	0.467946
SFPQ	0.27004	-1.07507
PHOX2B	0.265251	0.696146
FOXJ1	0.264498	0.95821
CC2D1A	0.260797	0.573184
PHF21A	0.258277	-0.941029
SOX12	0.256932	-0.390286
PAX8	0.249742	0.0209926
TFE3	0.244427	0.332633
PATZ1	0.230631	-1.9338
TEF	0.228913	0.279807
DMBX1	0.225233	-0.383435
RBPJL	0.222906	-0.364404
ZNF746	0.213454	0.0418385
ELF5	0.211825	-0.479426
NKX2-1	0.210436	0.658935
GLIS2	0.208987	-0.433701
IRF3	0.20838	2.04881
CTCF	0.207338	0.821805
ZNF143	0.204456	0.561709
LMO2	0.200737	-0.655518
TCF20	0.199778	0.013039
AR	0.198109	0.918053
PAX6	0.192504	0.19659
FOXI1	0.190817	-0.0928063
NACC2	0.190208	1.09031
DMRT1	0.189303	-1.03637
PAX4	0.188823	0.204829
TCF12	0.171115	1.60028
MUC1	0.168004	0.244279
ZNF148	0.163638	0.393972
ETS1	0.158012	0.210181
RBPJ	0.155603	0.618989
KLF17	0.155482	-0.222175
H2AFY2	0.152936	0.830794
POU4F2	0.151073	-0.547699
MYOG	0.147988	-0.0688329
BATF	0.147516	-0.220812
CHD2	0.145169	1.36762
TCF7L2	0.144087	-0.789464
ONECUT3	0.142831	1.32631
ESRRG	0.13258	0.630886
BAZ2A	0.129882	-0.505834
HNF4G	0.129578	0.924344
BACH1	0.127213	0.380867
MYF6	0.119084	-0.416759
ZNF281	0.11899	0.953882
HOXD4	0.117564	-1.27741
FOSL1	0.116894	0.715069
SMAD5	0.115233	-0.00759433
GSC	0.114012	0.0399107
HMGB2	0.109684	-0.171092
BATF3	0.109658	-0.167466
E2F4	0.109558	-0.618192
HLF	0.109102	0.158553
HES3	0.107037	0.233749
DLX2	0.105699	-0.334037
MESP1	0.099351	0.439492
ETV1	0.0991997	0.646496
ACTB	0.0946346	-0.600879
SIX4	0.0934241	2.89983
GRHL1	0.0844892	-0.0831844
PCGF6	0.0828863	0.328792
NR1I2	0.0808186	0.104618
NHLH2	0.0752619	0.0184216
PTF1A	0.0692841	0.220157
SETX	0.0682758	-0.149303
HNF1B	0.0677437	0.510585
MSX2	0.0636749	-2.1183
KMT2A	0.061263	1.08519
SPIC	0.0606583	0.419665
NFXL1	0.0602807	0.695505
RRN3	0.059717	0.12381
GTF3C5	0.0594267	0.404459
MTA2	0.0582689	0.00819447
BORCS8-MEF2B	0.0573299	1.87273
USP3	0.0542788	1.08277
ETS2	0.0499797	0.0948118
GLIS1	0.0496155	0.190105
IRF1	0.0482289	-0.573757
NR1D2	0.0458959	-0.477246
FLI1	0.044679	1.41672
BCL11B	0.0415777	-0.539993
XBP1	0.0360216	0.970618
ADP-ribose) polymerase	0.0328577	-0.0273908
JARID2	0.0283038	-0.434086
GATA4	0.0258	1.21482
CREB1	0.0250045	-1.3657
LEF1	0.0217898	0.262412
RFX5	0.0204728	0.582065
CTCFL	0.0196218	-0.0719702
TBX2	0.010966	-0.744412
NKX2-5	0.00746708	1.11623
SP1	0.00349175	1.63992
NFYA	0.00145536	-0.625034
PROX1	0.000987915	0.117786
AKNA		0
CREM		0
MAFA		0
MSGN1		0
RXRG		0
LYL1		0
C1/C2		0
CHD7	-0.00202364	0.717656
NKRF	-0.00281288	0.755607
MLXIPL	-0.00508776	-0.432668
HLTF	-0.00641209	-0.0838651
BCOR	-0.00664307	0.309399
POU3F2	-0.00705173	0.756698
KLHL6	-0.0116699	0.616007
ZBTB17	-0.01174	0.0299127
NR2C2	-0.0125043	0.0870118
TAF1B	-0.0181737	0.366994
YAP1	-0.0300422	-1.16177
KLF13	-0.0315786	0.0342587
SREBF1	-0.0382283	1.26185
NRIP1	-0.0397649	-0.169135
ARID3C	-0.040635	-0.458892
ZNF239	-0.0412924	0.888593
RAX2	-0.0425517	-0.155149
NOBOX	-0.0467884	0.423772
DBP	-0.0480388	0.452729
IKZF3	-0.0505096	0.937638
SSBP4	-0.0518635	-0.548458
E2F8	-0.061358	0.337852
MYB	-0.0651871	0.495392
ALX4	-0.0712867	0.255154
PAX5	-0.071539	0.0188954
HR	-0.0786438	-0.819571
ELF1	-0.0868783	-1.70782
EHF	-0.0929216	-0.807942
ZNF593	-0.0946217	-1.8493
MAX	-0.0993434	-0.237811
SUV39H1	-0.099556	-0.942286
MZF1	-0.0997324	-0.102566
HOXB5	-0.0999426	0.495958
POLRMT	-0.105073	-0.854546
NFKB1	-0.1102	0.169291
NFIB	-0.110699	-1.68411
NFIL3	-0.121759	0.204616
ETV6	-0.123071	0.338419
SMAD4	-0.125075	-0.0823147
BARX2	-0.125937	-0.417539
PARK2	-0.13257	-0.617528
AEBP1	-0.133543	-1.28828
NR5A2	-0.138074	-0.32335
SOX10	-0.14001	-0.226316
ASCL3	-0.143088	-1.20125
DUX1	-0.143484	-1.09416
ZGPAT	-0.143976	0.912879
SP2	-0.151616	-0.47079
NSD1	-0.155505	-0.814945
NFAT5	-0.156708	-0.187117
RUNX1	-0.157975	2.19634
GTF3C1	-0.170013	0.71555
RFX1	-0.175988	-0.262096
BAHCC1	-0.17606	0.177903
NONO	-0.178914	-0.688164
KDM5A	-0.183099	0.869937
JUNB	-0.183505	0.408538
POU3F4	-0.183802	0.321315
CRX	-0.184595	0.490918
XRN2	-0.184856	-0.158943
FUBP3	-0.187081	0.20578
MEOX1	-0.191145	-0.697188
SOX6	-0.192778	-0.283732
ASCL4	-0.193564	-0.295434
HOXC11	-0.200654	-0.665816
TAF1C	-0.200947	-0.575089
CTNNB1	-0.201264	0.217575
NFATC1	-0.209691	-0.520306
NFE2L1	-0.212638	-2.00622
ETV2	-0.215078	1.37012
TBX5	-0.219182	0.751806
LITAF	-0.222668	-1.49922
HOXD3	-0.223769	0.111917
SOX11	-0.224586	-0.485336
TFAP2C	-0.229083	-1.40238
MEF2D	-0.232303	-1.45997
TFEC	-0.234957	1.10615
PRDM2	-0.236804	0.623418
DDN	-0.247469	-0.609942
SP5	-0.250197	0.13189
THRAP3	-0.256209	-0.442471
KLF4	-0.26201	-0.593717
FOXJ2	-0.263096	-1.08515
HNF4A	-0.268537	0.0873057
ATF3	-0.275211	0.617752
SOX2	-0.27584	0.180672
BHLHE41	-0.279889	0.215675
TFAP2D	-0.285833	0.207711
HESX1	-0.287344	0.434255
RFX3	-0.294423	0.319907
SMAD3	-0.295957	-0.371099
FIGLA	-0.297986	-0.264803
HOXD10	-0.300984	1.34518
ZC3H8	-0.302859	-1.71785
TBR1	-0.30309	0.120886
STAT5B	-0.310863	-0.340123
TFAP2A	-0.313676	1.18184
JUND	-0.31383	-0.342281
GSX1	-0.319652	-0.120148
NDN	-0.32007	0.725962
NFATC4	-0.320403	0.0858121
GCM1	-0.320737	-1.099
MTA1	-0.324743	-0.399
NFE2L3	-0.32655	0.180877
LHX3	-0.328147	-0.753211
TAL1	-0.329358	-0.678321
MITF	-0.331385	0.555011
BCL11A	-0.33258	-0.854953
BARHL1	-0.338553	-0.169855
ETV3	-0.341778	0.514727
ZNF350	-0.344918	-0.415938
MBD3	-0.357203	-0.398721
ZBED4	-0.360393	-0.567637
NFE2L2	-0.361094	-0.515483
NR2C1	-0.363521	-0.799762
CC2D1B	-0.367743	-0.0250041
ARX	-0.374843	-0.274917
HOXB7	-0.380108	2.5598
ZNF589	-0.382559	-1.09936
ALX1	-0.387554	0.728884
GATA2	-0.400957	-0.637068
SMARCC2	-0.404741	0.169375
IRF7	-0.407532	-0.666948
POU1F1	-0.411914	-0.584375
DDIT3	-0.412888	-0.274091
BAHD1	-0.415034	-0.421451
FOXF1	-0.41533	0.27893
ONECUT2	-0.420627	-0.239787
YBX3	-0.421964	-0.506289
DLX1	-0.430283	-1.40943
RREB1	-0.43093	-0.64764
POU2AF1	-0.432056	0.01346
ARNTL	-0.436986	0.1773
NKX6-1	-0.442456	-0.178766
ZIC3	-0.442829	0.473903
HOXA2	-0.443004	0.224737
HDAC1	-0.450189	-1.0717
FOXA2	-0.45689	0.342513
CRY2	-0.461504	-0.304406
ELK1	-0.463921	-0.820737
PGR	-0.469203	0.444912
VAX2	-0.475801	-0.0782273
ZNF750	-0.476622	-1.42996
NFATC2	-0.484006	-0.933187
SOHLH1	-0.484167	-0.358531
NR5A1	-0.48532	-0.2914
ZFPM1	-0.491931	1.1008
HMGA1	-0.497963	-1.13692
NEUROD6	-0.499106	-0.0419446
ID1	-0.502406	-0.98277
HINFP	-0.502706	-0.137199
MYF5	-0.507729	1.06517
GMEB1	-0.510374	-0.912175
TLX1	-0.513903	0.686898
RPS3	-0.518484	0.231628
CEBPA	-0.52173	-1.06166
ZNF219	-0.52389	0.313563
T	-0.537351	0.474832
GATAD2B	-0.546184	-0.261394
CEBPD	-0.548555	-0.336809
IKZF5	-0.552746	-0.4551
PPARA	-0.557142	0.0948147
MAFB	-0.558772	-0.113196
MNT	-0.559687	1.46415
NR2F1	-0.566839	-1.20434
NR1H2	-0.568442	-0.231239
EBF3	-0.568995	-0.60216
NHLH1	-0.57066	0.0033794
FOXS1	-0.571929	-1.52825
FEZF2	-0.577142	-0.567577
STOX1	-0.57847	-0.648203
SPIB	-0.581461	-0.307162
SIX5	-0.595116	-0.509736
CLOCK	-0.604455	-0.18951
CREBBP	-0.609063	-0.0370111
NEUROD1	-0.614156	0.297922
OTX1	-0.615302	0.620563
TBX20	-0.617883	-0.868462
TNRC18	-0.62745	-0.4312
SSBP2	-0.627611	-1.54618
REL	-0.63274	0.137776
RARA	-0.635552	-0.52598
AEBP2	-0.642549	-0.95305
PAX1	-0.653063	0.90439
ZNF536	-0.656244	-0.135158
GATA6	-0.658027	-0.0706343
ZNF395	-0.670573	-0.705855
SUZ12	-0.672336	-0.557754
CDX4	-0.673343	-0.334194
HMX1	-0.674614	0.330455
ZMYND8	-0.68205	0.538508
NR1D1	-0.684736	-0.207882
NR2F6	-0.692545	-0.49599
SOX3	-0.69574	-0.212483
TBX18	-0.701651	-1.00273
SATB1	-0.705459	0.131805
CREB3L3	-0.725054	-1.13456
TAL2	-0.731485	-1.93343
NRL	-0.736603	0.00410397
KLF10	-0.74094	-0.109067
LMX1B	-0.747993	-2.51042
HSF1	-0.748359	-1.06344
MYBL2	-0.750365	0.360648
ACTN4	-0.756777	-0.874028
PRDM5	-0.761888	-0.26646
DNA)	-0.762988	-1.12497
CDX2	-0.765209	-1.10586
HOXD8	-0.770317	0.324137
MSC	-0.770521	0.9002
FOXL2	-0.779789	0.164018
ERG	-0.782356	-0.25505
AIRE	-0.79609	-0.74176
TRPS1	-0.801577	3.80854
MEIS1	-0.804133	0.15323
NR2E3	-0.811909	-1.69796
ZNF431	-0.811964	-1.70173
YY2	-0.813753	-0.781998
ATF4	-0.819786	-0.929382
ZNF639	-0.831735	-0.366368
ELK3	-0.833157	-0.8944
FOXP2	-0.834008	-0.467717
FOXF2	-0.83478	-1.13185
NFYC	-0.835181	-0.666672
TBP	-0.837664	-0.807277
POU4F1	-0.84395	-0.3511
HNRNPK	-0.848913	0.697144
GLI2	-0.85255	0.550523
SOX4	-0.859997	-1.5062
LDB1	-0.862295	-0.25563
NLRC5	-0.876533	-1.56037
TBX19	-0.876755	-1.16621
ARID5B	-0.882377	0.609518
HDAC2	-0.886273	0.873006
ATOH1	-0.886724	-0.635214
H2AFZ	-0.904778	0.68311
ETV7	-0.907967	0.471133
SMAD2	-0.909047	0.101017
POU4F3	-0.928365	0.0964045
ISL1	-0.938397	0.0542041
SMYD3	-0.945972	-1.37218
BCL6B	-0.953373	0.15653
TBX3	-0.962245	-1.50928
PRDM14	-0.970229	0.609371
PRMT5	-0.974236	-1.13051
ZBTB7C	-0.996132	-0.23352
SMARCA4	-1.0071	-1.69793
PRDM1	-1.00806	-0.784349
SALL2	-1.01376	0.522439
IRF4	-1.01628	-1.13433
SREBF2	-1.01885	0.182232
PLAGL1	-1.02602	1.25293
POU2F3	-1.02714	-0.244313
MLX	-1.02819	-0.444909
TBX15	-1.0316	-1.72791
REST	-1.04221	-0.142579
TCF4	-1.04665	0.354961
RFX2	-1.0706	-0.134335
PITX2	-1.10802	-0.0531152
SMAD6	-1.11036	-1.5116
RXRA	-1.12404	-0.733758
KLF8	-1.1402	-1.10493
EAF2	-1.14568	-0.572157
NEUROD2	-1.14797	-0.0255753
ZBED1	-1.16248	-1.00467
NFKB2	-1.16411	-0.492482
TFDP2	-1.17818	-2.38019
PBX1	-1.19504	-3.75985
PITX1	-1.19849	-0.743258
EP300	-1.20359	0.772835
ZSCAN21	-1.22051	-0.995252
POU2F2	-1.26173	-0.586607
PAXBP1	-1.28605	-0.667216
OTX2	-1.29449	0.778676
SUV39H2	-1.31716	-0.281674
HAND2	-1.31866	-1.63324
CEBPB	-1.32401	-1.14515
SATB2	-1.33332	-0.799419
KDM2B	-1.35964	-0.0111598
RUVBL2	-1.36727	-0.894181
NR4A3	-1.39087	0.216679
JUN	-1.39136	-0.802422
ARID3A	-1.45066	-1.36644
KDM6A	-1.53794	-0.651791
ZBTB16	-1.56551	0.178436
NKX2-8	-1.61546	2.2057
GMEB2	-1.62876	0.0479925
ZNF277	-1.6424	-2.57118
OVOL1	-1.64733	-0.389377
TAF1	-1.66279	-2.66014
KLF6	-1.72744	-0.865613
HOXC10	-1.76004	-0.109735
MYOCD	-1.77007	-0.339524
KLF5	-1.77631	-1.06821
VAX1	-1.87501	-1.61999
SMARCD2	-1.89684	0.720333
BARX1	-1.91486	0.163013
ZKSCAN3	-1.91851	-0.307877
ELF4	-1.94901	-2.04237
JMJD1C	-1.98995	-1.95201
ATF1	-1.99263	-1.12035
ZNF704	-1.99408	-1.35273
TFAP2E	-2.02869	-0.0648275
IRF8	-2.03853	-1.34692
PBX3	-2.15207	-0.841273
EGR2	-2.19835	-0.699777
FOXK2	-2.20403	-0.89739
RXRB	-2.30295	-3.73185
RARG	-2.33221	-1.02469
ZNF217	-2.3866	-1.04714
ZBTB7B	-2.41786	-0.98152
BCL6	-2.4328	-0.657973
FOXQ1	-2.555	-0.100288
CREBRF	-2.90895	-1.52744
PAX2	-3.14762	-1.07552
SPI1	-3.18699	-1.34083
CUX1	-3.2086	-1.96009
HSF2	-3.28583	0.154055
LIF	-3.32155	-2.13035
THRA	-4.7197	-0.372488
