# Supplementary material for: TFAP2 transcription factors are regulators of lipid droplet biogenesis
Source: eLife. 2018 Sep 26;7:e36330. doi: 10.7554/eLife.36330 (PMC6170152; doi:10.7554/eLife.36330)
Supplement: Figure 2—source data 2. [file elife-36330-fig2-data2.xlsx]

## Sheet: Rank Sum
TABLE S3
Transcription Factor	Rank: Wnt3a	Rank: FA	Average Rank
SP1	3	2	2.5
c-Myc	2	3	2.5
CREB1	1	7	4
Androgen receptor	6	10	8
RelA (p65 NF-kB subunit)	10	8	9
ESR1 (nuclear)	5	13	9
c-Jun	15	5	10
E2F1	7	14	10.5
C/EBPbeta	12	11	11.5
SREBP1 (nuclear)	20	15	17.5
NANOG	13	22	17.5
EGR1	11	24	17.5
C/EBPalpha	30	6	18
HSF1	25	12	18.5
p53	4	35	19.5
PPAR-gamma	41	1	21
STAT1	29	17	23
SP3	14	32	23
HIF1A	9	39	24
Oct-3/4	8	43	25.5
KLF4	21	36	28.5
GCR	17	46	31.5
c-Fos	60	4	32
HNF4-alpha	42	27	34.5
SRF	45	26	35.5
SOX2	34	37	35.5
NF-kB1 (p50)	35	50	42.5
ERR1	69	21	45
PR (nuclear)	31	59	45
YY1	26	64	45
VDR	68	23	45.5
NRF2	57	34	45.5
c-Rel (NF-kB subunit)	47	44	45.5
RXRA	73	20	46.5
PPAR-beta(delta)	82	16	49
IRF4	18	80	49
SMAD3	74	30	52
C/EBP zeta	36	68	52
STAT3	19	88	53.5
ATF-4	27	81	54
RUNX2	94	18	56
PPAR-alpha	106	9	57.5
TR-alpha	87	29	58
ATF-3	63	53	58
IRF8	67	51	59
PU.1	40	78	59
NFYB	51	70	60.5
NFYA	33	90	61.5
AP-2A	58	73	65.5
FOXO3A	39	92	65.5
Fra-2	50	83	66.5
RelB (NF-kB subunit)	62	72	67
ETS1	70	75	72.5
TBP	81	69	75
TEF-1	118	33	75.5
TFIIB	110	41	75.5
USF1	96	55	75.5
E2F7	49	103	76
FXR	108	54	81
SREBP2 (nuclear)	53	109	81
E2F3	37	127	82
CUX1 (p110)	16	148	82
p63	24	146	85
ROR-alpha	115	57	86
NF-kB2 (p100)	91	82	86.5
SMAD4	54	125	89.5
AHR	75	105	90
C/EBPdelta	150	31	90.5
RARalpha	59	124	91.5
ATH1	83	101	92
RFX6	138	47	92.5
JunD	78	107	92.5
NF-kB p50/p50	151	38	94.5
XBP1	32	160	96
LXR-alpha	131	62	96.5
ZNF145	124	71	97.5
KLF11 (TIEG2)	86	113	99.5
NF-kB1 (p105)	116	85	100.5
FKHR	66	137	101.5
STAT5A	43	164	103.5
b-Myb	85	123	104
STAT6	80	129	104.5
JunB	121	89	105
SREBP1 precursor	111	102	106.5
E2F6	64	149	106.5
IRF1	123	94	108.5
Fra-1	178	40	109
ERR3	177	42	109.5
GATA-1	128	93	110.5
SOX9	166	58	112
HNF3-beta	176	49	112.5
PAX5	92	135	113.5
CTCF	97	131	114
TITF1	182	48	115
FLI1	156	77	116.5
Bcl-6	84	152	118
USF2	153	86	119.5
TAF1	98	142	120
HOXB4	167	74	120.5
Miz-1	130	117	123.5
ATF-2	132	122	127
MEF2A	227	28	127.5
TEF-3	105	155	130
ChREBP	245	19	132
NF-AT5	199	65	132
BMAL1	190	76	133
IRF7	207	67	137
CLOCK	152	126	139
FoxL2	173	108	140.5
HNF1-alpha	248	45	146.5
AML1 (RUNX1)	196	97	146.5
TWIST1	137	159	148
NUR77	180	118	149
ATF-5	172	132	152
FOXD3	195	111	153
YB-1	194	112	153
RARbeta	241	66	153.5
PEG3	181	128	154.5
COUP-TFII	163	147	155
Oct-2	255	63	159
IRF2	259	60	159.5
Lef-1	174	145	159.5
NRF1	164	158	161
NF-AT2(NFATC1)	217	106	161.5
MCR	247	87	167
Elk-3	183	162	172.5
IRF3	243	110	176.5
PAX6	277	98	187.5
JDP2	250	150	200
SREBP2 precursor	252	151	201.5
E2F4	22
ZNF143	23
TCF7L2 (TCF4)	28
GATA-3	38
FOXM1	44
EPAS1	46
PAX8	48
WT1	52
E2F2	55
Elk-1	56
ATF-6 alpha (90kDa)	61
LRH1	65
E2F8	71
PROX1	72
DEC1 (Stra13)	76
ARNT	77
TR-beta	79
SHP	88
NK31	89
Evi-1	90
c-Myb	93
ESR2	95
ZNF306	99
HNF3-alpha	100
p73	101
PBX1	102
KLF5	103
DBP	104
SF1	107
CIC	109
SALL4	112
ATF-6 alpha (50kDa)	113
ERM	114
Pdx-1 (IPF1)	117
GATA-2	119
NF-kB2 (p52)	120
ZNF161	122
STAT4	125
HOXB9	126
TAL1	127
TAF3	129
LXR-beta	133
SMAD1	134
E2F5	135
SP4	136
ATF-1	139
TRIP2	140
SP2	141
ZNF42 (MZF1)	142
MITF	143
EGR2 (Krox20)	144
MAZ	145
PXR	146
Elk-4	147
TFIIE, alpha subunit	148
MAFG	149
STAT2	154
IRF9	155
hASH1	157
TFE3	158
BLIMP1 (PRDI-BF1)	159
Oct-1	160
N-Myc	161
REV-ERBalpha	162
ERF	165
NFYC	168
GLI-2	169
ETS2	170
SMAD2	171
MYOD	175
E4BP4	179
KLF17	184
Max	185
FOXP3	186
BTEB1	187
PRDM5	188
MAD	189
SLUG	191
MIST1	192
TCF8	193
RARgamma	197
ELF5	198
ID2	200
ZF5	201
E4F1	202
GATA-4	203
STAT5B	204
Aiolos	205
FOXP1	206
HSF2	208
OTX2	209
SNAIL1	210
PAX7	211
HES1	212
NF-E2 (45 kDa)	213
HOX11	214
TAF4 (TAFII130)	215
CDX2	216
HOXA2	218
KLF2	219
TCF7L1 (TCF3)	220
TIEG1	221
TBX3	222
CREB3L2	223
FOXN3	224
MLXIP	225
NAB1	226
GFI-1	228
ZNF217	229
BAPX1	230
BACH1	231
CAR	232
EGR3	233
Menin	234
YAP1 (YAp65)	235
HNF1-beta	236
ELF1	237
MSX1	238
SOX5	239
FOXP2	240
ETV3	242
ZNF281	244
ER81	246
CSDA	249
RXRG	251
FOXK1	253
PEA3	254
AHRR	256
HB9	257
ZNF224	258
DEC2	260
Nkx6.1	261
FOXK2 (ILF1-4)	262
EKLF1	263
SOX10	264
SMAD5	265
SOX3	266
FBI-1 (Pokemon)	267
MKL1	268
AP-4	269
KLF6	270
BACH2	271
PREP1	272
MeCP2	273
Mxi1	274
OVOL1	275
STOX1	276

## Sheet: Wnt3a TF Enrichment
Transcription Factors
Network Object Name	Actual	n	R	N	Expected	Ratio	p-value	z-score	Rank
CREB1	467	1338	5128	38444	178.5	2.617	2.368e-93	23.61	1
c-Myc	309	1338	2521	38444	87.74	3.522	6.579e-89	24.87	2
SP1	212	1338	1646	38444	57.29	3.701	3.644e-63	21.27	3
p53	161	1338	1275	38444	44.37	3.628	1.936e-46	18.12	4
ESR1 (nuclear)	157	1338	1284	38444	44.69	3.513	1.718e-43	17.39	5
Androgen receptor	126	1338	1003	38444	34.91	3.609	4.453e-36	15.9	6
E2F1	108	1338	852	38444	29.65	3.642	2.469e-31	14.81	7
Oct-3/4	132	1338	1245	38444	43.33	3.046	3.346e-30	13.94	8
HIF1A	96	1338	709	38444	24.68	3.89	3.442e-30	14.75	9
RelA (p65 NF-kB subunit)	107	1338	938	38444	32.65	3.278	3.575e-27	13.41	10
EGR1	71	1338	453	38444	15.77	4.503	1.942e-26	14.24	11
C/EBPbeta	82	1338	635	38444	22.1	3.71	1.528e-24	13.08	12
NANOG	86	1338	727	38444	25.3	3.399	4.475e-23	12.4	13
SP3	71	1338	520	38444	18.1	3.923	8.156e-23	12.74	14
c-Jun	88	1338	829	38444	28.85	3.05	1.985e-20	11.33	15
CUX1 (p110)	121	1338	1399	38444	48.69	2.485	3.72e-20	10.75	16
GCR	63	1338	484	38444	16.85	3.74	2.606e-19	11.52	17
IRF4	58	1338	435	38444	15.14	3.831	2.237e-18	11.28	18
STAT3	73	1338	676	38444	23.53	3.103	1.501e-17	10.47	19
SREBP1 (nuclear)	32	1338	144	38444	5.012	6.385	3.751e-17	12.29	20
KLF4	48	1338	328	38444	11.42	4.205	4.594e-17	11.07	21
E2F4	48	1338	342	38444	11.9	4.033	2.496e-16	10.7	22
ZNF143	89	1338	989	38444	34.42	2.586	4.13e-16	9.593	23
p63	55	1338	445	38444	15.49	3.551	4.946e-16	10.28	24
HSF1	43	1338	289	38444	10.06	4.275	1.071e-15	10.61	25
YY1	96	1338	1148	38444	39.95	2.403	2.884e-15	9.163	26
ATF-4	31	1338	158	38444	5.499	5.637	4.68e-15	11.09	27
TCF7L2 (TCF4)	49	1338	383	38444	13.33	3.676	5.072e-15	9.994	28
STAT1	47	1338	360	38444	12.53	3.751	8.446e-15	9.959	29
C/EBPalpha	49	1338	401	38444	13.96	3.511	3.059e-14	9.598	30
PR (nuclear)	39	1338	267	38444	9.293	4.197	4.214e-14	9.954	31
XBP1	29	1338	157	38444	5.464	5.307	1.802e-13	10.27	32
NFYA	30	1338	177	38444	6.16	4.87	7.212e-13	9.799	33
SOX2	61	1338	629	38444	21.89	2.786	8.295e-13	8.578	34
NF-kB1 (p50)	51	1338	473	38444	16.46	3.098	1.233e-12	8.718	35
C/EBP zeta	22	1338	95	38444	3.306	6.654	1.264e-12	10.48	36
E2F3	30	1338	182	38444	6.334	4.736	1.519e-12	9.594	37
GATA-3	61	1338	646	38444	22.48	2.713	2.59e-12	8.338	38
FOXO3A	33	1338	226	38444	7.866	4.195	3.788e-12	9.149	39
PU.1	44	1338	397	38444	13.82	3.184	1.731e-11	8.308	40
PPAR-gamma	38	1338	319	38444	11.1	3.423	4.967e-11	8.251	41
HNF4-alpha	51	1338	524	38444	18.24	2.796	5.47e-11	7.863	42
STAT5A	22	1338	116	38444	4.037	5.449	8.502e-11	9.113	43
FOXM1	23	1338	131	38444	4.559	5.045	1.623e-10	8.806	44
SRF	43	1338	412	38444	14.34	2.999	2.008e-10	7.746	45
EPAS1	27	1338	185	38444	6.439	4.193	3.403e-10	8.268	46
c-Rel (NF-kB subunit)	30	1338	226	38444	7.866	3.814	3.878e-10	8.057	47
PAX8	19	1338	94	38444	3.272	5.808	5.207e-10	8.862	48
E2F7	14	1338	50	38444	1.74	8.045	1.039e-09	9.466	49
Fra-2	17	1338	78	38444	2.715	6.262	1.231e-09	8.834	50
NFYB	23	1338	146	38444	5.081	4.526	1.492e-09	8.106	51
WT1	25	1338	172	38444	5.986	4.176	1.657e-09	7.928	52
SREBP2 (nuclear)	16	1338	71	38444	2.471	6.475	2.237e-09	8.768	53
SMAD4	29	1338	230	38444	8.005	3.623	2.536e-09	7.576	54
E2F2	22	1338	139	38444	4.838	4.548	3.08e-09	7.957	55
Elk-1	24	1338	165	38444	5.743	4.179	3.439e-09	7.771	56
NRF2	28	1338	219	38444	7.622	3.674	3.47e-09	7.534	57
AP-2A	32	1338	277	38444	9.641	3.319	3.499e-09	7.356	58
RARalpha	22	1338	142	38444	4.942	4.452	4.639e-09	7.824	59
c-Fos	37	1338	362	38444	12.6	2.937	6.382e-09	7.03	60
ATF-6 alpha (90kDa)	9	1338	20	38444	0.6961	12.93	8.665e-09	10.13	61
RelB (NF-kB subunit)	26	1338	200	38444	6.961	3.735	8.765e-09	7.364	62
ATF-3	23	1338	160	38444	5.569	4.13	9.121e-09	7.534	63
E2F6	17	1338	91	38444	3.167	5.368	1.472e-08	7.921	64
LRH1	19	1338	116	38444	4.037	4.706	2.03e-08	7.591	65
FKHR	31	1338	283	38444	9.849	3.147	2.148e-08	6.885	66
IRF8	29	1338	258	38444	8.979	3.23	3.436e-08	6.823	67
VDR	28	1338	245	38444	8.527	3.284	4.122e-08	6.809	68
ERR1	25	1338	202	38444	7.03	3.556	4.526e-08	6.916	69
ETS1	37	1338	393	38444	13.68	2.705	5.525e-08	6.452	70
E2F8	10	1338	31	38444	1.079	9.269	5.738e-08	8.745	71
PROX1	12	1338	48	38444	1.671	7.183	6.568e-08	8.14	72
RXRA	24	1338	192	38444	6.682	3.592	6.907e-08	6.836	73
SMAD3	29	1338	268	38444	9.327	3.109	7.906e-08	6.579	74
AHR	30	1338	285	38444	9.919	3.024	8.792e-08	6.514	75
DEC1 (Stra13)	14	1338	71	38444	2.471	5.666	1.348e-07	7.472	76
ARNT	15	1338	82	38444	2.854	5.256	1.378e-07	7.326	77
JunD	24	1338	203	38444	7.065	3.397	1.988e-07	6.502	78
TR-beta	20	1338	147	38444	5.116	3.909	2.091e-07	6.711	79
STAT6	36	1338	397	38444	13.82	2.605	2.102e-07	6.106	80
TBP	19	1338	136	38444	4.733	4.014	2.748e-07	6.686	81
PPAR-beta(delta)	18	1338	123	38444	4.281	4.205	2.773e-07	6.76	82
ATH1	14	1338	76	38444	2.645	5.293	3.273e-07	7.113	83
Bcl-6	20	1338	156	38444	5.429	3.684	5.539e-07	6.378	84
b-Myb	15	1338	93	38444	3.237	4.634	7.55e-07	6.663	85
KLF11 (TIEG2)	9	1338	33	38444	1.149	7.836	1.322e-06	7.46	86
TR-alpha	17	1338	123	38444	4.281	3.971	1.34e-06	6.267	87
SHP	11	1338	52	38444	1.81	6.078	1.418e-06	6.958	88
NK31	13	1338	75	38444	2.61	4.98	1.767e-06	6.552	89
Evi-1	14	1338	89	38444	3.098	4.52	2.387e-06	6.313	90
NF-kB2 (p100)	6	1338	13	38444	0.4525	13.26	2.444e-06	8.396	91
PAX5	18	1338	144	38444	5.012	3.592	2.904e-06	5.916	92
c-Myb	21	1338	190	38444	6.613	3.176	3.356e-06	5.709	93
RUNX2	20	1338	176	38444	6.125	3.265	3.724e-06	5.719	94
ESR2	18	1338	147	38444	5.116	3.518	3.907e-06	5.809	95
USF1	23	1338	224	38444	7.796	2.95	4.127e-06	5.559	96
CTCF	19	1338	164	38444	5.708	3.329	4.86e-06	5.675	97
TAF1	8	1338	30	38444	1.044	7.662	6.228e-06	6.932	98
ZNF306	8	1338	30	38444	1.044	7.662	6.228e-06	6.932	99
HNF3-alpha	23	1338	230	38444	8.005	2.873	6.418e-06	5.411	100
p73	19	1338	169	38444	5.882	3.23	7.548e-06	5.518	101
PBX1	14	1338	98	38444	3.411	4.105	7.63e-06	5.844	102
KLF5	12	1338	73	38444	2.541	4.723	7.776e-06	6.046	103
DBP	32	1338	391	38444	13.61	2.352	8.448e-06	5.101	104
TEF-3	12	1338	74	38444	2.575	4.659	8.989e-06	5.983	105
PPAR-alpha	21	1338	204	38444	7.1	2.958	1.023e-05	5.324	106
SF1	12	1338	77	38444	2.68	4.478	1.368e-05	5.801	107
FXR	18	1338	162	38444	5.638	3.192	1.528e-05	5.31	108
CIC	6	1338	17	38444	0.5917	10.14	1.563e-05	7.158	109
TFIIB	12	1338	79	38444	2.75	4.364	1.788e-05	5.684	110
SREBP1 precursor	10	1338	56	38444	1.949	5.131	2.089e-05	5.874	111
SALL4	16	1338	136	38444	4.733	3.38	2.196e-05	5.28	112
ATF-6 alpha (50kDa)	7	1338	26	38444	0.9049	7.736	2.239e-05	6.524	113
ERM	6	1338	18	38444	0.6265	9.577	2.276e-05	6.912	114
ROR-alpha	13	1338	94	38444	3.272	3.974	2.283e-05	5.481	115
NF-kB1 (p105)	11	1338	69	38444	2.401	4.581	2.493e-05	5.653	116
Pdx-1 (IPF1)	15	1338	123	38444	4.281	3.504	2.564e-05	5.282	117
TEF-1	12	1338	82	38444	2.854	4.205	2.629e-05	5.517	118
GATA-2	20	1338	202	38444	7.03	2.845	2.901e-05	4.992	119
NF-kB2 (p52)	14	1338	110	38444	3.828	3.657	2.918e-05	5.299	120
JunB	16	1338	140	38444	4.873	3.284	3.152e-05	5.14	121
ZNF161	6	1338	19	38444	0.6613	9.073	3.228e-05	6.684	122
IRF1	20	1338	205	38444	7.135	2.803	3.584e-05	4.916	123
ZNF145	9	1338	48	38444	1.671	5.387	3.595e-05	5.776	124
STAT4	10	1338	61	38444	2.123	4.71	4.52e-05	5.507	125
HOXB9	4	1338	7	38444	0.2436	16.42	4.7e-05	7.747	126
TAL1	20	1338	209	38444	7.274	2.75	4.716e-05	4.816	127
GATA-1	30	1338	389	38444	13.54	2.216	4.842e-05	4.577	128
TAF3	5	1338	13	38444	0.4525	11.05	5.164e-05	6.883	129
Miz-1	14	1338	116	38444	4.037	3.468	5.301e-05	5.055	130
LXR-alpha	13	1338	102	38444	3.55	3.662	5.487e-05	5.112	131
ATF-2	18	1338	179	38444	6.23	2.889	5.825e-05	4.811	132
LXR-beta	8	1338	41	38444	1.427	5.606	7.238e-05	5.604	133
SMAD1	15	1338	135	38444	4.699	3.192	7.634e-05	4.846	134
E2F5	7	1338	31	38444	1.079	6.488	7.688e-05	5.805	135
SP4	10	1338	65	38444	2.262	4.42	7.913e-05	5.241	136
TWIST1	15	1338	136	38444	4.733	3.169	8.308e-05	4.812	137
RFX6	8	1338	42	38444	1.462	5.473	8.669e-05	5.507	138
ATF-1	10	1338	66	38444	2.297	4.353	9.038e-05	5.178	139
TRIP2	4	1338	8	38444	0.2784	14.37	9.139e-05	7.18	140
SP2	8	1338	43	38444	1.497	5.346	0.0001033	5.414	141
ZNF42 (MZF1)	9	1338	55	38444	1.914	4.702	0.0001096	5.217	142
MITF	15	1338	140	38444	4.873	3.078	0.0001155	4.678	143
EGR2 (Krox20)	13	1338	110	38444	3.828	3.396	0.0001204	4.778	144
MAZ	8	1338	44	38444	1.531	5.224	0.0001224	5.324	145
PXR	8	1338	44	38444	1.531	5.224	0.0001224	5.324	146
Elk-4	7	1338	34	38444	1.183	5.916	0.0001436	5.445	147
TFIIE, alpha subunit	4	1338	9	38444	0.3132	12.77	0.00016	6.706	148
MAFG	5	1338	16	38444	0.5569	8.979	0.0001606	6.062	149
C/EBPdelta	16	1338	161	38444	5.603	2.855	0.0001686	4.48	150
NF-kB p50/p50	10	1338	71	38444	2.471	4.047	0.0001691	4.88	151
CLOCK	11	1338	85	38444	2.958	3.718	0.0001758	4.764	152
USF2	15	1338	146	38444	5.081	2.952	0.0001847	4.487	153
STAT2	10	1338	72	38444	2.506	3.991	0.0001903	4.823	154
IRF9	6	1338	26	38444	0.9049	6.631	0.0002223	5.454	155
FLI1	13	1338	117	38444	4.072	3.192	0.0002248	4.51	156
hASH1	9	1338	61	38444	2.123	4.239	0.0002481	4.808	157
TFE3	7	1338	37	38444	1.288	5.436	0.0002509	5.126	158
BLIMP1 (PRDI-BF1)	11	1338	90	38444	3.132	3.512	0.0002928	4.53	159
Oct-1	17	1338	188	38444	6.543	2.598	0.0003321	4.171	160
N-Myc	20	1338	242	38444	8.423	2.375	0.0003438	4.073	161
REV-ERBalpha	8	1338	51	38444	1.775	4.507	0.0003547	4.759	162
COUP-TFII	12	1338	107	38444	3.724	3.222	0.0003551	4.371	163
NRF1	14	1338	140	38444	4.873	2.873	0.0003948	4.216	164
ERF	3	1338	5	38444	0.174	17.24	0.0003991	6.896	165
SOX9	16	1338	174	38444	6.056	2.642	0.0004075	4.122	166
HOXB4	7	1338	40	38444	1.392	5.028	0.0004149	4.84	167
NFYC	6	1338	29	38444	1.009	5.945	0.0004195	5.058	168
GLI-2	8	1338	54	38444	1.879	4.257	0.0005286	4.548	169
ETS2	13	1338	130	38444	4.525	2.873	0.000628	4.063	170
SMAD2	14	1338	147	38444	5.116	2.736	0.000646	4.005	171
ATF-5	4	1338	13	38444	0.4525	8.841	0.0008117	5.369	172
FoxL2	8	1338	60	38444	2.088	3.831	0.001082	4.167	173
Lef-1	14	1338	157	38444	5.464	2.562	0.00123	3.724	174
MYOD	15	1338	178	38444	6.195	2.421	0.001484	3.609	175
HNF3-beta	21	1338	292	38444	10.16	2.066	0.001495	3.473	176
ERR3	11	1338	110	38444	3.828	2.873	0.0016	3.736	177
Fra-1	10	1338	94	38444	3.272	3.057	0.001614	3.791	178
E4BP4	8	1338	64	38444	2.227	3.592	0.001657	3.94	179
NUR77	8	1338	64	38444	2.227	3.592	0.001657	3.94	180
PEG3	5	1338	26	38444	0.9049	5.525	0.001811	4.383	181
TITF1	10	1338	96	38444	3.341	2.993	0.001893	3.713	182
Elk-3	4	1338	16	38444	0.5569	7.183	0.001901	4.697	183
KLF17	4	1338	16	38444	0.5569	7.183	0.001901	4.697	184
Max	10	1338	97	38444	3.376	2.962	0.002046	3.674	185
FOXP3	20	1338	281	38444	9.78	2.045	0.002157	3.339	186
BTEB1	5	1338	27	38444	0.9397	5.321	0.00216	4.265	187
PRDM5	9	1338	83	38444	2.889	3.116	0.002382	3.664	188
MAD	4	1338	17	38444	0.5917	6.761	0.002418	4.511	189
BMAL1	11	1338	116	38444	4.037	2.725	0.002446	3.532	190
SLUG	8	1338	68	38444	2.367	3.38	0.002449	3.731	191
MIST1	5	1338	28	38444	0.9745	5.131	0.002555	4.152	192
TCF8	11	1338	117	38444	4.072	2.701	0.002616	3.5	193
YB-1	12	1338	135	38444	4.699	2.554	0.002738	3.435	194
FOXD3	6	1338	41	38444	1.427	4.205	0.002785	3.899	195
AML1 (RUNX1)	21	1338	308	38444	10.72	1.959	0.002835	3.209	196
RARgamma	8	1338	70	38444	2.436	3.284	0.002944	3.631	197
ELF5	5	1338	29	38444	1.009	4.954	0.003	4.045	198
NF-AT5	5	1338	29	38444	1.009	4.954	0.003	4.045	199
ID2	3	1338	9	38444	0.3132	9.577	0.003018	4.887	200
ZF5	3	1338	9	38444	0.3132	9.577	0.003018	4.887	201
E4F1	6	1338	42	38444	1.462	4.105	0.003155	3.823	202
GATA-4	14	1338	174	38444	6.056	2.312	0.003209	3.293	203
STAT5B	8	1338	71	38444	2.471	3.237	0.003218	3.583	204
Aiolos	4	1338	19	38444	0.6613	6.049	0.003725	4.18	205
FOXP1	6	1338	44	38444	1.531	3.918	0.004003	3.678	206
IRF7	6	1338	44	38444	1.531	3.918	0.004003	3.678	207
HSF2	5	1338	31	38444	1.079	4.634	0.004053	3.844	208
OTX2	8	1338	74	38444	2.575	3.106	0.004162	3.444	209
SNAIL1	10	1338	107	38444	3.724	2.685	0.004193	3.315	210
PAX7	6	1338	45	38444	1.566	3.831	0.004485	3.608	211
HES1	8	1338	76	38444	2.645	3.024	0.004902	3.355	212
NF-E2 (45 kDa)	7	1338	61	38444	2.123	3.297	0.005166	3.41	213
HOX11	3	1338	11	38444	0.3828	7.836	0.005627	4.306	214
TAF4 (TAFII130)	3	1338	11	38444	0.3828	7.836	0.005627	4.306	215
CDX2	11	1338	130	38444	4.525	2.431	0.005844	3.104	216
NF-AT2(NFATC1)	11	1338	130	38444	4.525	2.431	0.005844	3.104	217
HOXA2	5	1338	34	38444	1.183	4.225	0.006091	3.573	218
KLF2	6	1338	48	38444	1.671	3.592	0.006189	3.412	219
TCF7L1 (TCF3)	8	1338	79	38444	2.75	2.91	0.006193	3.226	220
TIEG1	4	1338	22	38444	0.7657	5.224	0.006472	3.763	221
TBX3	6	1338	49	38444	1.705	3.518	0.006849	3.349	222
CREB3L2	2	1338	4	38444	0.1392	14.37	0.00693	5.076	223
FOXN3	2	1338	4	38444	0.1392	14.37	0.00693	5.076	224
MLXIP	2	1338	4	38444	0.1392	14.37	0.00693	5.076	225
NAB1	2	1338	4	38444	0.1392	14.37	0.00693	5.076	226
MEF2A	8	1338	81	38444	2.819	2.838	0.007188	3.144	227
GFI-1	6	1338	50	38444	1.74	3.448	0.007558	3.289	228
ZNF217	9	1338	99	38444	3.446	2.612	0.007686	3.05	229
BAPX1	7	1338	66	38444	2.297	3.047	0.007945	3.161	230
BACH1	5	1338	37	38444	1.288	3.883	0.00876	3.331	231
CAR	4	1338	24	38444	0.8353	4.789	0.008898	3.526	232
EGR3	4	1338	24	38444	0.8353	4.789	0.008898	3.526	233
Menin	3	1338	13	38444	0.4525	6.631	0.00926	3.856	234
YAP1 (YAp65)	3	1338	13	38444	0.4525	6.631	0.00926	3.856	235
HNF1-beta	9	1338	103	38444	3.585	2.511	0.009864	2.915	236
ELF1	8	1338	86	38444	2.993	2.673	0.0102	2.949	237
MSX1	4	1338	25	38444	0.8701	4.597	0.01031	3.416	238
SOX5	4	1338	25	38444	0.8701	4.597	0.01031	3.416	239
FOXP2	14	1338	200	38444	6.961	2.011	0.01065	2.723	240
RARbeta	6	1338	54	38444	1.879	3.192	0.01093	3.062	241
ETV3	2	1338	5	38444	0.174	11.49	0.01128	4.456	242
IRF3	6	1338	55	38444	1.914	3.134	0.01192	3.008	243
ZNF281	5	1338	41	38444	1.427	3.504	0.01344	3.046	244
ChREBP	7	1338	73	38444	2.541	2.755	0.0135	2.85	245
ER81	4	1338	27	38444	0.9397	4.257	0.01354	3.214	246
MCR	4	1338	27	38444	0.9397	4.257	0.01354	3.214	247
HNF1-alpha	17	1338	269	38444	9.362	1.816	0.01372	2.55	248
CSDA	3	1338	15	38444	0.5221	5.746	0.01399	3.491	249
JDP2	3	1338	15	38444	0.5221	5.746	0.01399	3.491	250
RXRG	3	1338	15	38444	0.5221	5.746	0.01399	3.491	251
SREBP2 precursor	3	1338	15	38444	0.5221	5.746	0.01399	3.491	252
FOXK1	7	1338	74	38444	2.575	2.718	0.01448	2.809	253
PEA3	7	1338	75	38444	2.61	2.682	0.01551	2.768	254
Oct-2	5	1338	43	38444	1.497	3.341	0.01632	2.917	255
AHRR	2	1338	6	38444	0.2088	9.577	0.01654	3.99	256
HB9	2	1338	6	38444	0.2088	9.577	0.01654	3.99	257
ZNF224	2	1338	6	38444	0.2088	9.577	0.01654	3.99	258
IRF2	7	1338	76	38444	2.645	2.646	0.01658	2.728	259
DEC2	3	1338	16	38444	0.5569	5.387	0.01678	3.333	260
Nkx6.1	3	1338	16	38444	0.5569	5.387	0.01678	3.333	261
FOXK2 (ILF1-4)	4	1338	29	38444	1.009	3.963	0.01735	3.031	262
EKLF1	6	1338	60	38444	2.088	2.873	0.0178	2.757	263
SOX10	5	1338	44	38444	1.531	3.265	0.01789	2.855	264
SMAD5	7	1338	78	38444	2.715	2.579	0.01889	2.65	265
SOX3	4	1338	30	38444	1.044	3.831	0.01948	2.946	266
FBI-1 (Pokemon)	5	1338	45	38444	1.566	3.192	0.01957	2.794	267
MKL1	3	1338	17	38444	0.5917	5.07	0.01986	3.188	268
AP-4	6	1338	62	38444	2.158	2.781	0.02063	2.664	269
KLF6	6	1338	62	38444	2.158	2.781	0.02063	2.664	270
BACH2	4	1338	31	38444	1.079	3.707	0.02176	2.864	271
PREP1	4	1338	31	38444	1.079	3.707	0.02176	2.864	272
MeCP2	2	1338	7	38444	0.2436	8.209	0.02262	3.622	273
Mxi1	2	1338	7	38444	0.2436	8.209	0.02262	3.622	274
OVOL1	2	1338	7	38444	0.2436	8.209	0.02262	3.622	275
STOX1	2	1338	7	38444	0.2436	8.209	0.02262	3.622	276
PAX6	10	1338	138	38444	4.803	2.082	0.02277	2.418	277

## Sheet: E-MTAB-2872
Gene	RefSeq	FoldChange	p-Value
SERPINB3	NM_006919	16.8265	0.000188202
SERPINB4	NM_002974	6.54876	0.00338637
DKK1	NM_012242	4.6341	0.00033328
SLC7A11	NM_014331	4.50621	5.4971e-06
ULBP1	NM_025218	3.95563	0.0027384
CHST11	NM_018413	3.94077	0.00041054
ETV5	NM_004454	3.61318	2.9199e-05
MIR21	NR_029493	3.32972	0.000319132
GDF15	NM_004864	3.3048	0.000104283
STEAP4	NM_001205315	3.2305	4.6612e-05
ASNS	NM_133436	3.10915	0.000556505
GNG11	NM_004126	2.91872	8.1477e-06
C4BPA	NM_000715	2.87507	0.00135924
ABCC3	NM_003786	2.86377	0.00115968
TBC1D2	NM_001267571	2.85107	4.5542e-06
CFI	NM_000204	2.81433	0.000243142
ITGA2	NM_002203	2.80534	6.2464e-05
IL20RB	NM_144717	2.7637	0.000146356
SESN2	NM_031459	2.66612	5.9711e-05
STC2	NM_003714	2.65198	1.5143e-05
EHF	NM_001206616	2.64873	0.00129086
IL4R	NM_000418	2.62834	0.000183599
TSPAN1	NM_005727	2.62825	0.00207042
POM121L1P	NR_024591	2.57634	0.00417696
SLC16A6	NM_001174166	2.46159	5.0266e-05
TNS4	NM_032865	2.43687	0.000212686
ID1	NM_181353	2.42604	0.000636536
ETV4	NM_001986	2.41787	0.00104133
C1S	NM_201442	2.38537	0.00244801
CCDC177	NR_024630	2.38272	0.00253718
SPRY2	NM_005842	2.37205	0.000322745
GGT5	NM_001099781	2.36213	0.000128049
MMP7	NM_002423	2.35825	0.00451042
CP	NM_000096	2.3574	0.00109997
OSMR	NM_003999	2.33123	0.000385161
GFPT2	NM_005110	2.32572	0.00315095
LINC00882	NR_028303	2.29287	0.00156059
NUP50-AS1	NR_038956	2.26221	0.00145613
CD68	NM_001251	2.25532	0.000598019
C1QTNF1	NM_198593	2.17801	0.000211005
IER3	NM_003897	2.1764	0.000865329
GPCPD1	NM_019593	2.17268	0.00220656
PTGS2	NM_000963	2.15871	0.00336553
PDK4	NM_002612	2.15535	0.00465394
RHEBL1	NM_144593	2.14966	0.00146562
SAT1	NR_027783	2.14697	0.000338506
SLC45A4	NM_001080431	2.14566	0.000275157
FHL2	NM_201555	2.13799	5.7378e-06
MAP2K6	NM_002758	2.11899	0.00221213
IFIT2	NM_001547	2.11524	0.00614111
CYP24A1	NM_000782	2.10722	6.757e-05
IFNGR1	NM_000416	2.10487	7.6519e-05
H1F0	NM_005318	2.10102	0.000162109
TGFBI	NM_000358	2.0827	0.00086605
	NR_034120	2.06794	0.0010291
NPAS2	NM_002518	2.03104	0.000682923
PRDM1	NM_001198	2.02858	0.000209069
DDIT3	NM_001195056	2.02012	0.000116862
DLGAP1-AS1	NR_024101	2.01862	1.2457e-05
CTH	NM_001902	2.01317	0.000153231
BCL6	NM_001706	2.01177	5.1277e-05
PLAC4	NM_182832	1.99408	5.2214e-06
FAM84B	NM_174911	1.99086	0.000105914
TNFSF10	NM_003810	1.9779	7.1531e-05
C3	NM_000064	1.96815	4.6816e-05
EPAS1	NM_001430	1.96432	0.00260005
SERPING1	NM_000062	1.94917	0.00671124
C1RL	NM_016546	1.90285	0.000430192
CARS	NM_001014437	1.89362	0.00848701
ADGRG3	NM_170776	1.8876	0.00261314
LMO4	NM_006769	1.86314	0.000110283
OASL	NM_003733	1.85649	0.00567565
TUBE1	NM_016262	1.84851	0.000233183
RNF144B	NM_182757	1.84034	0.00173885
BMP6	NM_001718	1.83608	0.00141065
CYP1B1	NM_000104	1.82886	7.6474e-05
FZD10	NM_007197	1.82854	0.00236632
GSDMC	NM_031415	1.82069	0.00327669
DOCK11	NM_144658	1.81926	0.00999657
DUSP1	NM_004417	1.81671	0.000308131
NUDT9P1	NR_002779	1.81535	0.00558052
ECM2	NM_001393	1.81472	0.00342946
SOX4	NM_003107	1.81118	0.00269611
SH3RF3	NM_001099289	1.80745	0.000155468
ETHE1	NM_014297	1.807	0.00619185
DUSP4	NM_057158	1.80288	0.00593421
OR2A7	NM_001005328	1.79233	0.00232827
DDX58	NM_014314	1.78693	0.00240993
FZD4	NM_012193	1.78558	0.00139482
FGF2	NM_002006	1.78523	0.000191285
PAPPA	NM_002581	1.78132	0.000825248
TLE6	NM_001143986	1.77921	0.00194573
PSAT1	NM_058179	1.7639	6.6955e-05
SLFN5	NM_144975	1.74578	3.1275e-06
ARL4D	NM_001661	1.74378	0.0029291
JUNB	NM_002229	1.7415	0.00568728
RASL11A	NM_206827	1.7344	0.00717927
CEBPG	NM_001252296	1.72921	0.0012642
IFIT1	NM_001548	1.72689	0.0080966
PROS1	NM_000313	1.72445	0.00585748
LOC100128242	XR_110532	1.72379	0.000227901
TMEM2	NM_013390	1.71899	0.000386738
PKN1	NM_213560	1.71885	0.000171282
LGSN	NM_016571	1.70708	0.00980286
ACSL4	NM_022977	1.70403	0.000338866
SCNN1A	NM_001159576	1.69982	0.00715162
DDR2	NM_001014796	1.69038	0.00207666
MUC1	NM_001204286	1.68995	0.00103437
PARTICL	NR_038942	1.68899	0.00016608
BORCS5	NM_058169	1.68879	0.000207853
CITED4	NM_133467	1.68713	0.000523417
HOMER3	NR_027297	1.68679	0.000114594
KIF21B	NM_001252100	1.68018	0.00266326
NCOA7	NM_001199619	1.67766	0.000283391
EPGN	NM_001013442	1.67656	8.1854e-05
DRAM1	NM_018370	1.67501	0.000835799
NUPR1	NM_001042483	1.67118	0.00420983
SOCS3	NM_003955	1.66956	0.00311376
FTH1	NM_002032	1.66436	0.00707951
PLPP3	NM_003713	1.66194	0.000257583
DHRS3	NM_004753	1.66099	0.000348709
HEG1	NM_020733	1.6599	0.00193749
KYNU	NM_001199241	1.65711	0.000239818
C1R	NM_001733	1.65625	0.00149224
GARS	NM_002047	1.64776	0.000243613
ERRFI1	NM_018948	1.64587	1.9296e-05
ITGB4	NM_001005619	1.64572	0.000330681
IFIT3	NM_001031683	1.64133	0.00311706
GDPD1	NM_182569	1.63837	0.00325691
RAB31	NM_006868	1.63592	2.0268e-05
SEL1L3	NM_015187	1.62983	0.000435788
LINC00467	NR_026761	1.62912	4.1302e-05
SOCS6	NM_004232	1.62789	5.6118e-05
DTWD1	NM_020234	1.6264	0.000159352
IRF2BP2	NM_182972	1.62247	0.000462802
FUT1	NM_000148	1.60769	0.00858481
CD22	NM_001771	1.60503	0.00388355
CYB5B	NM_030579	1.5996	0.00145895
NFKBIZ	NM_031419	1.59626	0.000760771
MARS	NM_004990	1.58359	3.4666e-05
TCP11L2	NM_152772	1.58296	0.00109411
IL15	NM_172175	1.58129	0.00268865
WDR31	NM_001012361	1.58084	0.00974895
MIR548S	NR_036071	1.57629	0.0082955
SGPL1	NM_003901	1.57625	0.00632527
MMD	NM_012329	1.57538	7.9428e-07
SLC1A5	NM_005628	1.56501	8.7805e-05
TFPI	NM_001032281	1.56392	0.00123577
ARHGAP12	NM_018287	1.56067	0.000150029
HRK	NM_003806	1.55964	0.00201051
CDH10	NM_006727	1.55866	0.000662419
ZBED5-AS1	NR_034137	1.55429	0.00656786
LOC100506083	NR_039997	1.54776	0.00829236
LOC644669	NR_027417	1.54655	0.00421477
CRISPLD2	NM_031476	1.54056	0.00798361
MARVELD1	NM_031484	1.53519	0.0013764
HSPA13	NM_006948	1.52997	0.00270873
SERINC2	NM_001199039	1.52989	0.00523956
MME	NM_000902	1.52974	0.00291629
HIST1H2AI	NM_003509	1.52751	0.000317439
ANKS6	NM_173551	1.52714	0.0094958
WARS	NM_004184	1.52327	0.0014752
TFRC	NM_003234	1.52237	0.000399084
FLOT1	NM_005803	1.5214	0.00302832
SARS	NM_006513	1.51752	8.0075e-06
LOC100129534	NR_024489	1.51362	0.000449382
PTPRJ	NM_002843	1.51282	0.000468242
LINC00319	NR_026960	1.51141	0.0025436
RNF41	NR_040053	1.51019	4.1906e-05
DEPTOR	NM_022783	1.50601	0.00501891
TMPRSS3	NR_046020	1.50555	2.1203e-05
PPEF1	NM_006240	1.50409	0.00103304
CYP2S1	NM_030622	1.50167	0.000909601
EVA1C	NM_058187	1.50132	0.0046118
RGS2	NM_002923	1.50109	0.00997749
AHR	NM_001621	1.49895	0.00179669
FMNL2	NM_052905	1.49797	0.00285059
ICAM1	NM_000201	1.49735	9.0339e-05
HK2	NM_000189	1.49669	0.000797447
XPR1	NM_004736	1.49412	0.000950585
PAQR5	NM_017705	1.48445	0.00301007
SPRED2	NM_181784	1.48406	0.00122062
UBALD2	NM_182565	1.48404	0.000761717
KRT7	NM_005556	1.47584	0.00298572
GABPB1-AS1	NR_024490	1.47509	0.000536492
URB1-AS1	NR_026845	1.47457	0.00145483
TGFBR1	NM_004612	1.47357	0.00141374
LOC100506804	NR_040081	1.47342	0.00311333
IGFLR1	NM_024660	1.46787	0.00149198
TLCD2	NM_001164407	1.46716	0.00916713
ZFP36L1	NM_001244701	1.46678	0.00120805
TBC1D8	NM_001102426	1.46466	0.000175655
ANTXR1	NM_032208	1.46371	0.00727249
DDIT4	NM_019058	1.46066	0.000244206
TMEM35B	NM_001195156	1.45861	3.752e-06
SYDE1	NM_033025	1.45722	0.000344897
CEBPB	NM_005194	1.45391	0.0035978
SLC6A6	NM_003043	1.45026	0.000136965
PDP1	NM_001161779	1.45021	0.00317265
FOSL1	NM_005438	1.44811	0.00959637
ALDH3A1	NM_001135168	1.44613	0.00478977
JDP2	NM_001135049	1.44297	0.00109775
FAM60A	NM_001135811	1.44175	0.00237016
OSBP2	NM_030758	1.44006	0.00242405
VEGFA	NM_001025366	1.43773	0.00119274
STK17A	NM_004760	1.43511	0.00500753
FAM43A	NM_153690	1.43318	0.00231182
ZNF704	NM_001033723	1.43279	0.00216016
ZNF358	NM_018083	1.4321	0.00165095
TGFB1	NM_000660	1.42902	0.000347233
SECTM1	NM_003004	1.42548	0.00959755
LIPH	NM_139248	1.42543	0.00301597
CCDC18-AS1	NR_034089	1.42503	0.00303024
DUSP16	NM_030640	1.42389	0.000943842
CTSB	NM_001908	1.4216	0.00266543
SERPINF1	NM_002615	1.41807	0.00228534
IFI16	NM_005531	1.4177	0.00288645
RNU12	NR_029422	1.41597	0.00137394
PDE9A	NM_002606	1.41517	0.00258187
ENPP6	NM_153343	1.41402	0.00845521
ARSG	NM_014960	1.41215	0.000535567
USP40	NM_018218	1.40976	0.00115841
SHB	NM_003028	1.40726	0.00168022
BCDIN3D-AS1	NR_027499	1.40682	0.00205658
CMAHP	NR_002174	1.40644	0.00167216
ANKRD11	NM_001256182	1.40481	0.00140799
CSNK1E	NM_152221	1.40189	0.00072456
POLI	NM_007195	1.40173	0.00139549
PHACTR2	NM_001100164	1.39915	0.00148727
SMAGP	NM_001031628	1.3987	0.00131411
MFSD4B	NM_153369	1.39755	0.000748926
TNFSF12-TNFSF13	NM_172089	1.39684	0.00588955
STXBP5	NM_139244	1.3915	0.0045649
HAX1	NM_006118	1.38977	0.00839315
SPTSSA	NM_138288	1.38807	0.000769668
CMIP	NM_198390	1.38698	0.00934706
PRIM1	NM_000946	1.38403	0.00118018
SEMA4B	NM_020210	1.38323	0.00126839
PXK	NM_017771	1.38294	0.0037582
MAGEF1	NM_022149	1.38205	0.00576002
PKP2	NM_001005242	1.38172	0.00419643
MACC1-AS1	NR_046756	1.37835	0.0054978
MLXIPL	NM_032951	1.37187	0.00900073
RPGR	NM_000328	1.37184	0.00520006
LINC00518	NR_027793	1.3715	0.00193955
TBX3	NM_016569	1.37135	0.00296941
IFT81	NM_014055	1.37073	0.00595877
RAB27B	NM_004163	1.36958	0.000966401
MEX3C	NM_016626	1.36869	0.00148872
MEX3A	NM_001093725	1.36784	0.00184572
GTPBP2	NM_019096	1.36629	0.00337475
UBASH3B	NM_032873	1.36622	0.000450654
ITGA3	NM_002204	1.36559	7.2178e-05
CRTC3	NM_022769	1.36468	0.00165952
CAMK1D	NM_020397	1.36324	0.00889829
HIST1H3G	NM_003534	1.36206	0.00166424
TGIF1	NM_170695	1.3603	0.00283363
RBMS2	NM_002898	1.35884	0.00179126
VPS13C	NM_020821	1.35843	0.000399945
LINC01106	NR_027244	1.35758	0.000274669
LOC100288842	NR_027442	1.35677	0.00204427
MAL2	NM_052886	1.3554	0.00495987
LCE3E	NM_178435	1.35383	0.00556634
DDX60L	NM_001012967	1.35299	0.00397461
PDE4B	NM_001037341	1.35255	0.003048
RTTN	NM_173630	1.35173	0.00359432
KRCC1	NM_016618	1.35168	0.00224398
YPEL5	NM_001127401	1.3506	0.00511911
IQCB1	NM_001023570	1.34738	0.00481438
ANKRA2	NM_023039	1.34501	0.00138477
CD46	NM_002389	1.34489	0.00293031
PHKA2-AS1	NR_029379	1.34344	0.00595978
DUBR	NR_028302	1.34308	0.000922309
ZNF768	NM_024671	1.34233	0.00699965
MAT2A	NM_005911	1.34218	8.8957e-05
HIST1H3F	NM_021018	1.33992	0.00386311
APOL6	NM_030641	1.33744	0.00633546
ZFP36	NM_003407	1.33669	0.00148577
GLIPR1	NM_006851	1.33476	0.00823428
ZSWIM4	NM_023072	1.33444	2.5978e-05
IER2	NM_004907	1.33383	0.0045319
CREG2	NM_153836	1.33328	0.00905567
SRGAP3	NM_014850	1.33323	0.00305932
PGPEP1	NM_017712	1.33319	0.00279973
PDE4D	NM_001165899	1.33175	0.0083667
ZNF449	NM_152695	1.3314	0.00649626
H6PD	NM_004285	1.33017	0.00375552
AMOTL2	NM_016201	1.3292	0.000233414
PCNX1	NM_014982	1.3289	0.000717736
CYP2D7	NR_002570	1.32739	0.00876138
PGM2L1	NM_173582	1.32719	0.00119874
CFAP43	NM_025145	1.32647	0.0046775
PTPRS	NM_002850	1.32607	1.3254e-05
ZNF217	NM_006526	1.3257	0.00796034
AARS	NM_001605	1.32413	0.000593635
MSH5	NM_025259	1.32404	0.00481698
PTPRF	NM_002840	1.32343	0.00147983
METTL4	NM_022840	1.32271	0.00232035
SLC6A9	NM_201649	1.32267	0.00239013
ASCC1	NM_001198799	1.32168	0.00948323
FOXF2	NM_001452	1.31969	0.00191188
PPIL3	NM_130906	1.31958	5.6761e-05
RNASEH1-AS1	NR_038430	1.31725	0.00847273
TNFAIP1	NM_021137	1.31723	5.3907e-05
KLHL35	NM_001039548	1.31699	0.00367846
TIPARP	NM_001184717	1.31672	2.2248e-05
ETS2	NM_001256295	1.31664	0.00125405
LIAS	NM_006859	1.31641	0.000370813
PBX1	NM_002585	1.3163	0.00833427
PRTG	NM_173814	1.31612	0.00820393
STRA6	NM_001199040	1.31577	0.0001866
CLIC4	NM_013943	1.31561	5.9944e-05
CXCL10	NM_001565	1.3155	0.00141951
CAPG	NM_001747	1.31267	0.00144862
HIF1A	NM_001530	1.31222	8.6293e-05
BET1	NM_005868	1.31194	0.00902537
PCDH1	NM_032420	1.31078	0.00121286
TSEN15	NR_023349	1.30965	0.00235994
HIST1H1C	NM_005319	1.30962	0.000326818
SLC7A1	NM_003045	1.30902	0.00286539
MELTF	NM_005929	1.30806	0.00438603
GATAD1	NM_021167	1.30674	0.000334548
AGTPBP1	NM_015239	1.30656	0.00879551
FBLN2	NM_001165035	1.30507	0.00263917
FAM215A	NR_026770	1.30365	0.00392204
ACBD4	NM_001135704	1.30345	0.00078582
HINT2	NM_032593	1.3034	0.000978535
NOV	NM_002514	1.30263	0.00851663
LURAP1L	NM_203403	1.30236	0.00636642
PTGES	NM_004878	1.3011	0.00102318
SHMT2	NM_001166357	1.30079	0.00266496
MDM4	NM_002393	1.30067	0.0048254
GADD45B	NM_015675	1.29867	0.00433778
AKIP1	NR_045417	1.29826	0.00208912
FOXN3-AS1	NR_036500	1.2973	0.00935143
PHF21A	NM_001101802	1.29671	0.00139329
INPP5B	NM_005540	1.29622	0.00723916
YARS	NM_003680	1.29563	0.00284109
TRIM25	NM_005082	1.29539	0.00175624
ZNF41	NM_007130	1.2953	6.6787e-05
NR1D2	NM_005126	1.2951	0.00657232
MBNL2	NM_144778	1.2945	0.000669373
CEP41	NM_018718	1.29384	0.00349799
NTN4	NM_021229	1.29362	0.00324173
ANKRD29	NM_173505	1.29212	1.36e-05
EXOSC8	NM_181503	1.29183	0.00364584
TEAD1	NM_021961	1.28939	0.0070617
IL13RA1	NM_001560	1.28669	0.000197751
PTGR1	NM_001146108	1.28651	0.00595731
BZW1	NM_001207067	1.28645	0.00314709
NFX1	NM_002504	1.28486	0.00124064
TXNIP	NM_006472	1.2848	5.8088e-05
CALCOCO2	NM_001261390	1.28476	0.00177351
LINC-PINT	NR_015431	1.28329	0.00965258
PTPRM	NM_001105244	1.28269	0.000811254
TIMP1	NM_003254	1.28099	0.00650981
FBXO4	NM_012176	1.28064	0.00730166
JMY	NM_152405	1.28053	0.00417453
PCGF6	NM_001011663	1.27934	0.00721105
PRSS23	NM_007173	1.27796	0.00867385
SLC20A1	NM_005415	1.27618	0.00145451
OGT	NM_181672	1.27589	0.00862938
BRE	NM_199193	1.27502	4.8443e-05
DENND5B	NM_144973	1.27348	0.00317035
NUP160	NM_015231	1.27346	0.00172251
PLD2	NM_002663	1.27308	0.00896398
CALHM2	NM_015916	1.27284	0.00219004
SLC38A2	NM_018976	1.27262	0.000436928
ARRDC3	NM_020801	1.27258	0.00609487
TRIM66	NM_014818	1.27152	0.00443216
TADA3	NM_006354	1.27151	0.00493546
CTSF	NM_003793	1.27042	0.00334685
PLD1	NM_002662	1.26946	0.00439698
WDFY2	NM_052950	1.26938	0.00238094
SLC35E2B	NM_001110781	1.26879	0.00479081
SDCCAG8	NM_006642	1.26878	0.00874131
HIST1H4J	NM_021968	1.26845	0.00980071
ATP6AP1L	NM_001017971	1.26732	0.00635809
TBC1D5	NM_001134381	1.26686	0.00909362
GAA	NM_000152	1.26674	0.00441054
AGFG1	NM_001135187	1.26625	0.00830272
S100PBP	NM_022753	1.26623	0.00270596
NORAD	NR_027451	1.26612	0.00148087
CTDSP2	NM_005730	1.26576	0.000326639
LINC01123	NR_046110	1.26277	0.00159581
PRNP	NM_000311	1.26241	0.00726782
CCNL1	NM_020307	1.2596	0.00348737
VAPA	NM_003574	1.25949	0.000304507
SRR	NM_021947	1.25868	0.00613286
HMGN4	NM_006353	1.25862	0.00327462
PTER	NM_001001484	1.25752	0.000998497
SLC2A8	NM_014580	1.25656	0.0014776
TMEM8A	NM_021259	1.25645	0.00694448
MIR4737	NR_039890	1.2555	0.0038162
SMAD2	NM_005901	1.25531	0.000303539
MYOF	NM_013451	1.25423	0.000158396
CUX1	NM_001202543	1.25135	0.000738552
PPFIBP1	NM_003622	1.24926	0.00353492
PTPRH	NM_002842	1.24879	0.0092598
POLD3	NM_006591	1.24835	0.00925008
LOC646762	NR_024278	1.24731	0.000349208
MR1	NM_001531	1.24729	0.00404838
LRP4	NM_002334	1.24723	0.00204358
MAN2A2	NM_006122	1.24722	0.00709579
RREB1	NM_001003699	1.24691	0.00487904
NRIP1	NM_003489	1.24663	0.00611488
PROSER2	NM_153256	1.24653	0.00436628
SH2B3	NM_005475	1.24582	0.00237391
MUTYH	NM_001048171	1.24537	0.00596851
ARFGAP3	NM_014570	1.24416	0.00856818
ELL2	NM_012081	1.24405	0.00485596
SMIM10	NM_001163438	1.24399	0.007561
VHL	NM_000551	1.24279	0.00973357
LRRC61	NM_001142928	1.24252	0.0044052
DTX4	NM_015177	1.24222	0.00124293
37316	NM_016496	1.24214	0.00851819
MKRN2	NM_014160	1.24204	0.00677253
TSPAN14	NM_030927	1.24153	0.00862398
SLC41A2	NM_032148	1.2409	0.00260167
SNORA7B	NR_002992	1.23866	0.00719641
MIDN	NM_177401	1.23797	0.00676758
ABHD14B	NM_032750	1.23768	0.00461737
DOCK4	NM_014705	1.23695	0.0023526
LARS	NM_020117	1.23686	0.00105801
BACH1	NR_027655	1.23643	0.00598136
TMEM121	NM_025268	1.23638	0.000725383
NUB1	NM_001243351	1.2335	0.00276523
ABL1	NM_007313	1.23284	0.00541816
PLA2G6	NM_003560	1.23281	0.000367643
B4GALT5	NM_004776	1.23254	0.000620621
EAPP	NM_018453	1.23197	0.00926663
PCMTD2	NM_018257	1.23095	0.000351221
SALL4	NM_020436	1.23032	0.00100269
MLLT1	NM_005934	1.22995	0.00151469
ADARB1	NM_001112	1.2288	0.00338591
LOC100288846	NR_038935	1.22874	0.00531628
SLC25A36	NM_001104647	1.22858	9.2904e-05
CNBP	NM_001127192	1.22857	0.00218097
ARHGAP6	NM_013423	1.22753	0.00875757
SENP6	NM_015571	1.2273	0.00635864
LEP	NM_000230	1.22724	0.00597642
FNBP1	NM_015033	1.22496	0.00377277
LRRC8D	NM_001134479	1.22427	0.00598282
FYN	NM_002037	1.22406	0.00550435
IRF2BPL	NM_024496	1.22212	3.6909e-05
HEBP2	NM_014320	1.22202	0.00166873
IL24	NM_006850	1.22142	0.00949074
SLPI	NM_003064	1.22102	0.00252538
FARP1	NM_005766	1.2205	0.00289419
TLDC1	NM_020947	1.22034	0.00810807
LINC01144	NR_024270	1.22018	0.00367895
CNFN	NM_032488	1.21995	0.0037429
IFITM2	NM_006435	1.21949	0.00356039
INSL3	NM_001265587	1.21898	0.00618337
IFRD1	NM_001550	1.21688	1.1641e-05
MSRB2	NM_012228	1.21648	0.00556408
PHGDH	NM_006623	1.21616	0.000472542
UBE2H	NM_003344	1.2159	0.00493066
PTPN2	NM_002828	1.21491	0.00343504
TSTD2	NM_139246	1.21437	0.00229713
ZMYND8	NM_183047	1.21365	0.00209012
CDYL2	NM_152342	1.21355	0.00755913
PMS2P2	NR_003614	1.21244	0.00204781
PMS2P5	NR_027775	1.21244	0.00204781
NT5C2	NM_012229	1.21025	0.0017571
LRG1	NM_052972	1.2101	0.00193071
CHMP5	NM_016410	1.20909	0.00634078
AJUBA	NM_032876	1.20749	0.00494683
MTUS1	NM_001001924	1.2073	0.000702843
HEATR6	NM_022070	1.20726	0.000435777
ATXN3	NR_028459	1.20677	0.000915163
ZNF146	NM_007145	1.20634	0.00543969
GBAP1	NR_002188	1.206	0.00218279
ZFAND1	NM_024699	1.20567	0.00419969
CBS	NM_001178008	1.20547	0.00473503
PTTG1IP	NM_004339	1.20505	0.000690816
TMEM43	NM_024334	1.20462	0.00637501
FBXO36	NM_174899	1.20462	0.00523712
ZCCHC7	NM_032226	1.20459	0.00248971
SLC46A1	NM_080669	1.20452	0.000195244
C4A	NM_007293	1.20358	0.00358218
ODF2L	NM_001184765	1.20327	0.00694322
CCDC14	NM_022757	1.20121	0.002002
EYS	NM_001142800	1.20102	0.00205702
C4B	NM_001002029	1.20071	0.00969615
FOLR1	NM_016724	1.19985	0.00504637
CENPH	NM_022909	1.19981	0.000957084
LOC100192426	NR_024419	1.19928	0.000890363
CHKB-CPT1B	NR_027928	1.19899	0.00657886
GRN	NM_002087	1.19864	0.000666156
FRMD4B	NM_015123	1.19837	0.000455942
FAM129B	NM_022833	1.19837	0.00208112
SLC9A8	NM_001260491	1.19834	0.000575854
MUS81	NM_025128	1.19794	0.00816328
RBMS1	NM_016836	1.19775	0.00573869
PIGV	NM_001202554	1.19736	0.0033096
CTSD	NM_001909	1.19592	0.00111877
ZFAND5	NM_001102420	1.19563	0.00827265
MYC	NM_002467	1.19477	0.0044139
LINC01220	NR_038421	1.19445	0.00471022
CBLN3	NM_001039771	1.19425	0.00706162
FUT8	NM_178155	1.19349	0.00563985
HIST2H2AC	NM_003517	1.19343	0.0018438
GRPEL2	NM_152407	1.1933	9.9387e-05
TOM1L1	NM_005486	1.19159	0.000222768
WASH2P	NR_024077	1.19115	0.003244
PLEKHM2	NM_015164	1.18978	0.00984593
CUEDC2	NM_024040	1.18892	0.00507456
MCTS2P	NR_003677	1.18892	0.00363438
ZNF674-AS1	NR_015378	1.1886	0.00379978
EFNA3	NM_004952	1.1868	0.0097794
TMEM173	NM_198282	1.18671	0.00670505
PPP1R15B	NM_032833	1.18359	0.00473141
TARS	NM_001258438	1.18328	0.00190096
TEX21P	NR_033777	1.18077	0.00444626
TMEM203	NM_053045	1.177	0.00173283
STYXL1	NM_016086	1.1763	0.00636823
DPP7	NM_013379	1.17604	0.0078869
TTLL1	NR_027779	1.17569	0.00111841
NPC1	NM_000271	1.17505	0.00270675
WIPI2	NM_015610	1.1749	0.00356912
FAM149B1	NM_173348	1.17429	0.00572143
RAP1GAP2	NM_015085	1.17269	0.00488106
SIM2	NM_009586	1.17263	0.00542209
SLC27A2	NM_003645	1.17146	0.00647335
RHOBTB1	NR_024554	1.17066	0.00653501
SCMH1	NM_001031694	1.16944	0.0062509
TMEM198B	NR_036476	1.16867	0.00112633
CHEK2	NM_007194	1.16858	0.00746102
LIMCH1	NM_014988	1.16709	0.00699995
RRNAD1	NM_015997	1.16701	0.00314113
OR9Q2	NM_001005283	1.16673	0.00217118
H1FX	NM_006026	1.16643	0.00390678
MIR424	NR_029946	1.16428	0.00819024
CCNB1IP1	NM_182852	1.163	0.00839247
CTAGE15	NM_001008747	1.16185	0.00958306
CEP290	NM_025114	1.16063	0.00034161
ZCCHC11	NM_001009881	1.16025	0.00122088
RASSF5	NM_182663	1.15972	0.00722747
HDDC2	NM_016063	1.15951	0.00117999
NDC80	NM_006101	1.1589	0.00928023
LINC00917	NR_024406	1.15842	0.00792359
NUP210	NM_024923	1.15814	0.00956166
STK24	NM_003576	1.15761	0.00465406
HAUS4	NM_001166269	1.15707	0.00199256
ANGEL2	NM_144567	1.15685	0.004302
SNAPC5	NM_006049	1.15661	0.00508949
DENND1A	NM_024820	1.15569	0.0026792
YEATS4	NM_006530	1.1543	0.00530446
B4GALT1	NM_001497	1.15408	0.00584875
INTS6	NM_012141	1.1536	0.00182294
NPL	NM_030769	1.15325	0.000861464
MAP1S	NM_018174	1.15298	0.00944677
CD55	NM_000574	1.15282	0.00652735
NDRG1	NM_001135242	1.15278	0.0057833
EIF4G3	NM_001198801	1.15182	0.00534732
BBS4	NR_045566	1.15026	0.00664997
TNFRSF12A	NM_016639	1.14996	0.00303018
PXDN	NM_012293	1.14988	0.00357459
KAT5	NM_182710	1.14939	0.00496493
PP7080	NR_024158	1.14922	0.00592972
VMP1	NM_030938	1.14794	0.000222866
TBRG1	NM_032811	1.14556	0.006842
COMT	NM_001135162	1.14546	0.00953562
SUMF2	NM_015411	1.14488	0.00417032
NANOS1	NM_199461	1.14452	0.00163809
CDC34	NM_004359	1.1436	0.00405834
TCF20	NM_005650	1.14292	0.00562724
RNFT2	NM_001109903	1.14246	0.00820457
ZDHHC7	NM_001145548	1.14208	0.00234121
TMEM39B	NM_018056	1.14151	0.00194071
GPX8	NM_001008397	1.14129	0.00558271
CEP120	NM_153223	1.14123	0.00369849
TJP1	NM_003257	1.14069	0.00843381
GRAMD1A	NM_020895	1.13978	0.00181283
AMZ2	NM_016627	1.13951	0.0070564
KLHL2	NM_007246	1.13735	0.00991472
MAPT-AS1	NR_024559	1.13696	0.00973115
ERLIN2	NM_007175	1.13695	0.00747624
HSD17B1	NM_000413	1.13691	0.00128742
POLDIP2	NM_015584	1.13646	0.000254538
LGALS3BP	NM_005567	1.13546	0.00118951
NXN	NM_001205319	1.13485	0.000692863
PAIP1	NM_006451	1.13462	0.00467405
GART	NM_001136005	1.1345	0.00175132
FIZ1	NM_032836	1.13401	0.00997118
IPMK	NM_152230	1.13395	0.0047178
STAT3	NM_139276	1.13045	0.000243196
C4BPB	NM_000716	1.12929	0.00671244
SLC50A1	NM_018845	1.12891	0.00432094
SRI	NM_198901	1.12884	0.00245056
RCOR2	NM_173587	1.12857	0.00819596
CEACAM21	NM_001098506	1.12738	0.0056449
KRT18	NM_199187	1.12691	0.0097553
SLC3A2	NM_001012662	1.12594	0.00195746
KIAA0141	NM_014773	1.1253	0.00242493
RHOQ	NM_012249	1.12405	0.00409213
VWA9	NR_045105	1.12339	0.00445374
HNRNPH3	NM_012207	1.12323	0.00498569
CDKN2AIPNL	NM_080656	1.12261	0.00871043
EPN2	NM_014964	1.1223	0.00656424
PHF3	NM_015153	1.1208	0.00908795
DMTF1	NR_024549	1.1195	0.00911761
NCOA3	NM_181659	1.11936	0.00859807
GLG1	NR_027264	1.11924	0.00664306
ITGB1	NM_033668	1.11893	0.00978036
GRIN3B	NM_138690	1.11891	0.00389707
TERT	NM_198253	1.1187	0.00930774
XRN2	NM_012255	1.11602	0.00162487
CIRBP	NR_023312	1.11598	0.00631663
FUS	NM_004960	1.11576	0.0021703
MED13L	NM_015335	1.11358	0.00216045
TMEM37	NM_183240	1.11352	0.00818207
TERF2	NM_005652	1.11348	0.00686265
RNF214	NM_207343	1.11203	0.00419386
DPH5	NM_001077394	1.10913	0.00703879
	XR_109069	1.10795	0.00915253
RWDD2A	NM_033411	1.10766	0.00256902
SMCR8	NM_144775	1.10731	0.000543808
DDX21	NM_004728	1.10719	0.00664884
WNK1	NM_018979	1.10648	0.00785555
SNORD105	NR_004381	1.10528	0.00776848
NSRP1	NM_032141	1.10465	0.00383244
DCTN6	NM_006571	1.10338	0.00580323
WASH7P	NR_024540	1.10261	0.000604984
TRIM8	NM_030912	1.1015	0.000571314
PVR	NM_001135770	1.10144	0.00852544
EFEMP1	NM_001039348	1.10053	0.00790029
CSNK2A2	NM_001896	1.09932	0.00759458
PGAP2	NR_027018	1.09719	0.00404613
SHC1	NM_183001	1.09711	0.0049915
SLC38A1	NM_030674	1.09596	0.00684192
TAF15	NM_139215	1.09488	0.00111233
RPS6KB1	NM_003161	1.09466	0.000752686
CDC14A	NM_003672	1.09404	0.00170809
NUDT3	NM_006703	1.09358	0.00299836
TKFC	NM_015533	1.09256	0.00214753
ERLIN1	NM_006459	1.0919	0.00541245
CHTF8	NR_033227	1.0918	0.000423058
BOLA2	NM_001031827	1.08897	0.00552037
SERPINB8	NM_002640	1.08824	0.00581505
UBTF	NR_045058	1.08593	0.0011766
SLC25A39	NM_001143780	1.08332	0.00307891
UGGT2	NM_020121	1.08185	0.00366375
STX10	NM_003765	1.07868	0.00795339
ANP32B	NM_006401	1.0748	0.00182966
CDK10	NM_052988	1.07366	0.0045713
SYT1	NM_005639	1.07272	0.00679374
PSIP1	NM_033222	1.0707	0.00573817
PEX26	NM_001127649	1.0676	0.00967876
KATNA1	NM_007044	1.06345	0.00695698
WASH1	NM_182905	1.06207	0.00164519
ATF6B	NM_004381	1.06165	0.00572254
QSOX2	NM_181701	1.05895	0.00226124
EFCAB9	NM_001171183	1.05884	0.00149877
MYO1B	NM_001130158	1.05625	0.00437171
FAM120AOS	NM_198841	1.0501	0.00474553
NELFCD	NM_198976	1.04416	0.00485074
SBF2	NM_030962	1.03283	0.008357
AK2	NR_037592	1.02192	0.00438829
CDK1	NM_001786	-1.02724	0.00834352
ZNF644	NM_201269	-1.03887	0.000967918
PITPNA	NM_006224	-1.04337	0.00985931
FAM222B	NM_018182	-1.04592	0.00923888
GSPT1	NM_002094	-1.04877	0.000160669
MRPL17	NM_022061	-1.04926	0.00656245
KDELR2	NM_006854	-1.04949	0.00604768
TOPORS	NM_005802	-1.05231	0.00516863
YTHDC1	NM_001031732	-1.05396	0.0041686
NDUFB9	NM_005005	-1.05534	0.00475888
TTC38	NM_017931	-1.05974	0.00872389
FOXK1	NM_001037165	-1.06301	0.00480381
KIAA1147	NM_001080392	-1.06333	0.000352904
MRPS11	NM_022839	-1.06354	0.0018665
FKBP15	NM_015258	-1.06378	0.0084138
ALDH3A2	NM_001031806	-1.06484	0.00932746
COPG1	NM_016128	-1.06648	0.00613881
RIOK2	NM_018343	-1.06805	0.000512548
COX4I1	NM_001861	-1.06864	0.00593533
MMS22L	NM_198468	-1.06869	0.0063763
TFG	NM_006070	-1.07241	0.00100265
ADK	NM_001123	-1.07303	0.00737723
RPN1	NM_002950	-1.07476	0.00214929
PDHX	NM_003477	-1.07477	0.00552222
LINC01134	NR_024455	-1.07491	0.0091703
UBE2Q1	NM_017582	-1.07512	0.000294408
SSR1	NM_003144	-1.07664	7.4986e-05
RAB35	NM_006861	-1.07742	0.0054455
CCDC6	NM_005436	-1.07761	0.00222078
RSG1	NM_030907	-1.07786	0.00592389
PARP1	NM_001618	-1.07805	0.00234972
FAM21A	NM_001005751	-1.07807	0.00989682
ITGAV	NM_002210	-1.07892	0.00712591
PPP1CB	NM_002709	-1.08154	0.00106585
POLD1	NM_001256849	-1.08232	0.00868291
ZNF219	NM_001101672	-1.08368	0.00409547
SLC38A10	NM_001037984	-1.08382	0.00903012
HDAC5	NM_005474	-1.08465	0.00466868
FOXM1	NM_202002	-1.0858	0.000567497
HSD17B4	NM_001199291	-1.08609	0.00371766
MGST1	NM_145792	-1.08695	0.00958668
DONSON	NM_017613	-1.08829	0.00102509
CKAP2	NM_018204	-1.08873	0.00518864
MCM4	NM_005914	-1.08911	0.0041155
HS2ST1	NM_012262	-1.08923	0.00910945
VPS4A	NM_013245	-1.08931	0.0012779
PRSS54	NM_001080492	-1.08956	0.00997302
MRPS36	NM_033281	-1.0899	0.00847247
GDI2	NM_001494	-1.09068	0.00313479
PDLIM1	NM_020992	-1.09157	0.00166536
CDCA8	NM_001256875	-1.09216	0.00783046
COX20	NM_198076	-1.09296	0.00549083
RNPS1	NM_080594	-1.09379	0.00669136
RAB14	NM_016322	-1.09413	0.00905316
ARL8B	NM_018184	-1.09422	0.00933706
ZNF776	NM_173632	-1.09496	0.00435479
MRPS18A	NM_018135	-1.09501	0.00105967
CCNA2	NM_001237	-1.09678	0.00297392
TMEM97	NM_014573	-1.09692	0.00826072
AGO3	NM_024852	-1.09715	0.00823297
NISCH	NM_007184	-1.09963	0.00524398
MRI1	NM_001031727	-1.1002	0.0045298
MCEE	NM_032601	-1.10113	0.00947422
BMP4	NM_001202	-1.10117	0.00985556
KPNA1	NR_026698	-1.10145	0.00890955
AMD1	NM_001634	-1.10157	0.000223824
PLXNB2	NM_012401	-1.10203	0.00478907
PGM1	NM_002633	-1.10267	0.00165982
GTF3C5	NM_001122823	-1.10302	0.000240696
ALYREF	NM_005782	-1.10311	0.00728305
MYH10	NM_001256012	-1.10397	0.00759398
GANC	NM_198141	-1.10404	0.00759772
RRP1B	NM_015056	-1.10462	0.00915177
NETO2	NM_018092	-1.1051	0.00225002
CANX	NM_001746	-1.10535	0.00351335
EFCAB14	NM_014774	-1.10565	0.0070972
SYNJ2BP-COX16	NM_001202547	-1.10617	0.00857747
EIF3G	NM_003755	-1.10641	0.000606729
UBTD2	NM_152277	-1.1068	0.00661594
SCYL1	NM_020680	-1.10732	0.00651604
MIR3661	NR_037434	-1.10886	0.00772007
ATP5J2	NM_004889	-1.10923	0.00885781
CLDN3	NM_001306	-1.10931	0.000535264
RPRD1B	NM_021215	-1.11209	0.00569472
LMNB1	NM_005573	-1.11254	0.00141574
CLPB	NM_001258394	-1.11301	0.00738153
KIAA1586	NM_020931	-1.11324	0.00928025
NPTN	NM_012428	-1.11327	0.000706913
G6PC3	NR_028581	-1.11369	0.00203678
DHX15	NM_001358	-1.11378	0.00684769
RILP	NM_031430	-1.11378	0.00241083
DLD	NM_000108	-1.11444	0.00267994
LUZP6	NM_001128619	-1.11513	0.00873604
AQR	NM_014691	-1.11586	0.0055686
NOG	NM_005450	-1.11602	0.00262577
MAPKAP1	NM_001006617	-1.1171	0.00131607
NFIB	NM_001190737	-1.11744	0.00358948
ABCB8	NM_007188	-1.11773	0.00204097
STIM2	NM_001169117	-1.11815	0.00835317
TANGO6	NM_024562	-1.1187	0.000418858
FOXRED2	NM_001102371	-1.11875	0.00823767
RPA1	NM_002945	-1.1188	0.00121068
CLPTM1L	NM_030782	-1.12048	0.00984811
CLPTM1	NR_040006	-1.12054	0.00283241
SGMS1	NM_147156	-1.12062	0.000257955
SYCE1	NM_001143763	-1.12105	0.00736383
SLC39A13	NM_001128225	-1.12126	0.00594066
FMR1	NM_002024	-1.12155	0.00257731
NADK	NM_001198994	-1.12216	0.00925145
THADA	NM_001083953	-1.12283	0.00342058
HGH1	NM_016458	-1.12432	0.0098407
SLC25A13	NM_001160210	-1.12446	0.00520796
ATP6V0C	NM_001694	-1.1246	0.00510634
PER2	NM_022817	-1.1246	0.00908911
TTC21B	NM_024753	-1.12525	0.00809702
MAPK1	NM_138957	-1.12565	0.00062769
BAG3	NM_004281	-1.12609	0.00329722
HOXA5	NM_019102	-1.12627	0.00978233
PLEKHA1	NM_001195608	-1.12646	0.00582326
PABPC4	NM_001135653	-1.12673	0.00346468
TTF2	NM_003594	-1.12684	0.00565612
FAF2	NM_014613	-1.12706	0.00149419
UBAP2	NM_018449	-1.12714	0.00244595
ILK	NM_001014795	-1.12731	0.00245979
XAB2	NM_020196	-1.12778	0.00194657
HSPA8	NM_006597	-1.12855	0.000825739
OTX1	NM_001199770	-1.12906	0.00639519
PLEC	NM_201382	-1.12956	0.00472994
COPS4	NM_016129	-1.12976	0.00873398
ZNF556	NM_024967	-1.12995	0.0019129
LIG1	NM_000234	-1.13004	0.000256262
HUS1	NM_004507	-1.13009	0.00445879
RNF34	NM_194271	-1.13033	0.00198479
TOMM34	NM_006809	-1.13059	0.00135635
MYBL2	NM_002466	-1.13177	0.001515
REXO1L2P	NR_003594	-1.13209	0.00803604
TMEM87B	NM_032824	-1.13221	0.00621364
THOC7	NM_025075	-1.13223	0.00821469
PDIA4	NM_004911	-1.1325	0.00536906
BTBD9	NM_052893	-1.13257	0.00177398
RTKN	NM_033046	-1.13262	0.00791736
SIK3	NM_025164	-1.13303	0.00913747
EXOC6	NM_001013848	-1.13344	0.00885311
CTSZ	NM_001336	-1.13345	0.000609687
IMPAD1	NM_017813	-1.13389	4.464e-05
APOBEC3C	NM_014508	-1.13397	0.00678187
TCF25	NM_014972	-1.13403	0.00242226
STK40	NM_032017	-1.13464	0.0061885
PAPSS2	NM_004670	-1.13535	0.00371944
MFSD1	NM_022736	-1.13537	0.00766166
TCP1	NM_030752	-1.13557	0.000592672
ARCN1	NM_001655	-1.13572	0.00923252
BZW2	NM_001159767	-1.13649	0.00319961
KIF13A	NM_022113	-1.13659	0.00807941
AURKA	NM_198433	-1.13737	0.00764939
HDLBP	NM_001243900	-1.13789	0.00312138
TXNDC11	NM_015914	-1.1388	0.00666876
SRP68	NM_014230	-1.13909	0.00583906
TAP2	NM_000544	-1.13911	0.00338137
MAPRE1	NM_012325	-1.13911	0.00290484
AGL	NM_000028	-1.13952	0.000624163
SFN	NM_006142	-1.13978	0.000886448
EIF4E2	NM_004846	-1.13981	0.0083624
TMEM109	NM_024092	-1.14019	0.00454493
ROBO1	NM_002941	-1.14035	0.00674096
M6PR	NM_002355	-1.14068	0.00627261
HYOU1	NM_006389	-1.14075	0.00639599
FLNA	NM_001456	-1.14101	0.0033471
MAP7	NM_001198608	-1.14248	0.00164115
TNPO3	NR_034053	-1.1425	0.00209264
PM20D2	NM_001010853	-1.1432	0.00977903
PGD	NM_002631	-1.1436	0.00355275
PRPSAP1	NM_002766	-1.14373	0.000482902
DDX46	NM_014829	-1.14381	0.00605051
ASUN	NM_018164	-1.14384	0.000338867
PTAR1	NM_001099666	-1.14386	0.00066805
MCM10	NM_182751	-1.14434	0.00944226
BAZ1A	NM_013448	-1.14514	0.00933513
PMM2	NM_000303	-1.14585	0.00273297
STAG2	NM_001042750	-1.14594	0.00820501
SFXN2	NM_178858	-1.14605	0.00458701
TRAF6	NM_145803	-1.14626	0.00235764
SAMM50	NM_015380	-1.14635	0.0041342
DNMT3B	NM_006892	-1.14645	0.00702119
LOC727896	NR_026659	-1.14743	0.00150177
ATP6V1B2	NM_001693	-1.14812	0.00496448
ELOVL1	NM_001256399	-1.14831	0.00667593
CRYZ	NM_001130042	-1.15011	0.00541881
GYS1	NM_002103	-1.15065	0.000602114
CAPN6	NM_014289	-1.15106	0.00852473
TOR1AIP1	NM_001267578	-1.15108	0.00336938
POLH	NM_006502	-1.1518	0.00680778
KIAA0391	NM_014672	-1.15199	0.00992134
ISCU	NM_014301	-1.15252	0.00796839
MCU	NM_138357	-1.15254	0.00137564
TMEM147	NM_032635	-1.15261	0.00488432
TOMM22	NM_020243	-1.15324	0.0089655
EPT1	NM_033505	-1.15326	0.00026151
TECR	NR_038103	-1.15341	0.000589128
BIN1	NM_139343	-1.15343	0.006969
ADIPOR1	NR_046083	-1.15369	0.000507249
CLSTN1	NM_001009566	-1.15456	0.00473819
EFHD2	NM_024329	-1.15479	0.00325635
KPNA2	NM_002266	-1.15527	0.000362628
GGA2	NM_015044	-1.15527	0.00844407
PKP4	NM_003628	-1.15534	0.00449161
ASS1	NM_000050	-1.15573	0.00537499
SEL1L	NM_005065	-1.15663	0.00921481
TRA2A	NM_013293	-1.15682	0.00642331
RXRA	NM_002957	-1.15849	0.00270705
TAF9B	NM_015975	-1.15885	0.00897083
HPD	NM_001171993	-1.15941	0.00223843
LINC01622	NR_027115	-1.15962	0.00841029
VPS35	NM_018206	-1.16019	0.0025126
FLII	NM_002018	-1.16038	0.00976721
EI24	NM_004879	-1.16039	0.00058423
PPP2R3A	NM_002718	-1.16042	0.000188065
GBA2	NM_020944	-1.16154	0.00138184
SEC22B	NM_004892	-1.162	0.00797773
KIF11	NM_004523	-1.16201	0.00816274
CS	NM_004077	-1.16228	0.00258589
PDE10A	NR_045597	-1.16259	0.00444534
ZNF45	NM_003425	-1.16295	0.00147865
SRPK2	NM_182691	-1.16297	0.00653586
SPAST	NM_014946	-1.16319	0.00616698
ABCF3	NM_018358	-1.16332	0.00806522
TIMM22	NM_013337	-1.16382	0.00988568
LETM1	NM_012318	-1.16447	0.00417893
MYO9B	NM_004145	-1.16454	0.00126359
DHCR24	NM_014762	-1.16481	0.00232231
RAB8A	NM_005370	-1.16514	0.00643393
LPGAT1	NM_014873	-1.16557	0.00390581
DAG1	NM_001177634	-1.16746	0.00919714
LOC286437	NR_039980	-1.16798	0.00450078
HSD11B2	NM_000196	-1.1687	0.00507604
CHRNA5	NM_000745	-1.16873	0.00816114
NCAPD3	NM_015261	-1.16974	0.000191759
NLN	NM_020726	-1.17023	0.000827634
TBCD	NM_005993	-1.17055	0.00160437
TPMT	NM_000367	-1.17059	0.00877267
NUP188	NM_015354	-1.17133	0.000204149
PGRMC1	NM_006667	-1.17153	0.0012669
NOSIP	NM_015953	-1.17162	0.00335071
DHX38	NM_014003	-1.17267	0.00672062
CDV3	NM_001134422	-1.17319	0.000333799
HACD3	NM_016395	-1.1733	0.00493112
ACO2	NM_001098	-1.17427	0.0005621
PSMD11	NM_002815	-1.17431	0.00374317
HSP90B1	NM_003299	-1.17458	1.613e-05
HCCS	NM_005333	-1.17477	5.2643e-05
P2RX5-TAX1BP3	NR_037928	-1.17479	0.00725421
EXO1	NM_130398	-1.17492	0.000169825
ATP1B3	NM_001679	-1.17514	0.00383609
RBM23	NM_001077351	-1.17526	0.00559652
ZNF614	NM_025040	-1.17706	0.00140407
G3BP2	NM_012297	-1.17772	0.0066467
MTMR10	NM_017762	-1.17896	0.00567255
MUL1	NM_024544	-1.1791	0.0015965
RGS4	NM_001102445	-1.17949	0.00791436
NCAPH	NM_015341	-1.17957	7.3464e-05
INCENP	NM_001040694	-1.1798	0.000948193
VPS53	NM_001128159	-1.17999	0.00772106
ARRB2	NM_004313	-1.18005	0.00298263
CMBL	NM_138809	-1.18093	0.00540011
LMTK2	NM_014916	-1.18174	0.00589138
B3GNT4	NM_030765	-1.18256	0.00897818
HSD17B7P2	NR_003086	-1.18268	0.00705636
PRRC1	NM_130809	-1.18341	0.00525757
FAM83D	NM_030919	-1.18374	0.00803787
CPNE3	NM_003909	-1.18378	0.000749154
HSPG2	NM_005529	-1.18393	0.00936668
BEX3	NM_206917	-1.18434	0.00705316
ARHGEF12	NM_015313	-1.18457	0.00268584
PRPF38A	NM_032864	-1.1846	0.00338185
FGFR2	NM_022970	-1.18483	0.000579536
UBE4A	NM_004788	-1.18522	0.00377384
DLAT	NM_001931	-1.18602	0.00129505
PDE12	NM_177966	-1.18623	0.00788011
TMCO1	NM_001256165	-1.18639	0.00770745
ARRB1	NM_004041	-1.18644	0.00530222
RNF103	NM_005667	-1.18673	0.0029365
ORC1	NM_004153	-1.18682	0.00967276
PKM	NM_001206796	-1.18835	0.00351455
NF2	NM_016418	-1.18988	0.0057272
JMJD6	NM_015167	-1.1899	0.00964733
KIF20B	NM_016195	-1.18991	0.0022107
TRIM26	NM_003449	-1.18999	0.00711988
GNA11	NM_002067	-1.19001	0.000218033
PRPS1	NM_002764	-1.19025	0.00487399
TIMM17A	NM_006335	-1.19039	0.00894135
EIF4E3	NM_001134649	-1.19041	0.00489142
FSCN1	NM_003088	-1.19053	0.00214751
CLTC	NM_004859	-1.1915	0.000891493
OPA1	NM_130835	-1.19214	0.00176201
TP53I11	NM_001258320	-1.19259	0.0074492
DGCR2	NM_005137	-1.19271	0.00377263
ARHGEF9	NM_015185	-1.19284	0.00766162
SLC39A9	NM_018375	-1.19341	0.00888056
PLA2G15	NM_012320	-1.19362	0.000215849
SLC2A4RG	NM_020062	-1.19508	0.0065489
TMEM33	NM_018126	-1.19575	0.00163917
ATP5A1	NM_001001935	-1.19586	0.00977819
SPTAN1	NM_001130438	-1.19595	0.00129066
ZNF778	NM_001201407	-1.19648	0.00500043
GRAMD3	NM_001146321	-1.19801	0.00301379
VCL	NM_014000	-1.19864	0.00322552
36951	NM_022746	-1.19875	0.00215442
RBM8A	NM_005105	-1.1995	0.00644714
C2CD3	NM_015531	-1.19959	0.00440956
ARSB	NM_000046	-1.20017	0.00700022
KIF22	NM_001256270	-1.20021	0.00390295
PDE2A	NM_001143839	-1.20071	0.00732812
STK17B	NM_004226	-1.20086	0.00388823
CLOCK	NM_001267843	-1.20089	0.000187313
TRIP6	NM_003302	-1.2009	0.00857172
MTCL1	NM_015210	-1.2013	0.00517586
NUDT9	NM_024047	-1.20249	0.00358286
ZIK1	NM_001010879	-1.2028	0.00183905
SLC25A1	NM_005984	-1.20303	0.00326278
PIGS	NM_033198	-1.20321	0.0020067
PSMD3	NM_002809	-1.20428	0.00538543
MYH9	NM_002473	-1.2043	0.00746392
PALMD	NM_017734	-1.20464	0.00901254
GUCD1	NM_031444	-1.20466	0.00153771
FKBP14	NR_046478	-1.20561	0.00413259
SMAP1	NM_001044305	-1.20613	0.009363
CALM1	NM_006888	-1.20683	0.00441375
CKAP2L	NM_152515	-1.20775	0.0035187
PLLP	NM_015993	-1.2093	0.00345522
HERC3	NM_014606	-1.20954	0.00486449
TAF6L	NM_006473	-1.21059	0.000965768
DBI	NM_020548	-1.21105	0.00174379
TCTN3	NM_015631	-1.2114	0.0014908
RIC8B	NM_018157	-1.2114	0.00229852
TNFSF13B	NM_006573	-1.21167	0.00188985
ERLEC1	NM_015701	-1.21173	0.00645524
DDX24	NM_020414	-1.21217	0.00187056
NKRF	NM_001173487	-1.21293	0.000875707
MISP3	NR_024282	-1.21313	0.000874472
SLC25A44	NM_014655	-1.21316	0.00145413
KIAA0895L	NM_001040715	-1.21328	0.00360705
DPH2	NM_001384	-1.21455	0.00395748
KCTD12	NM_138444	-1.21521	0.000636971
PPP1R12A	NM_002480	-1.21659	0.00721713
SND1	NM_014390	-1.21663	0.000124042
LRRC59	NM_018509	-1.2174	0.00300867
TRAM2	NM_012288	-1.21761	0.00704472
MLXIP	NM_014938	-1.21798	0.00601043
SPATS2L	NM_001100422	-1.21816	0.00379276
ACTN4	NM_004924	-1.21838	2.6046e-05
ARHGDIA	NM_004309	-1.21852	0.00503771
ATP10D	NM_020453	-1.21858	0.00724994
ACLY	NM_001096	-1.21893	0.00561104
DNMBP	NM_015221	-1.21975	0.000454046
NSDHL	NM_001129765	-1.22023	0.0059802
NCLN	NM_020170	-1.22044	1.663e-05
DDX6	NM_001257191	-1.22071	0.00338413
MCCC1	NM_020166	-1.2214	0.0036597
KIF21A	NM_001173464	-1.22167	0.00244784
PRRT3-AS1	NR_046734	-1.22188	0.00635356
STK38	NM_007271	-1.2221	0.0023213
CAV1	NM_001172895	-1.22223	0.00780908
AHNAK	NM_001620	-1.22245	0.00506298
VPS26B	NM_052875	-1.22256	0.00250231
PLOD3	NM_001084	-1.22327	0.00869044
MOB3B	NM_024761	-1.22385	0.00913382
FAM83B	NM_001010872	-1.22416	0.00465152
CES2	NR_036684	-1.22442	0.00991623
FNBP1L	NM_001024948	-1.22451	0.000572603
PHTF1	NM_006608	-1.22539	0.00992393
SST	NM_001048	-1.22549	0.00320014
PLXNA3	NM_017514	-1.22553	0.00105523
THSD1	NM_018676	-1.22588	0.00886273
CYP51A1	NM_000786	-1.22689	0.000143883
ESYT1	NM_001184796	-1.2271	0.00128469
ZZEF1	NM_015113	-1.22766	0.0094793
MTMR4	NM_004687	-1.22784	0.00190651
NECAP1	NM_015509	-1.22964	0.00415031
TUBGCP4	NM_014444	-1.23149	7.987e-05
FASTKD1	NM_024622	-1.23208	0.00749178
PODXL	NM_001018111	-1.23314	0.000224582
PAPD5	NM_001040284	-1.23317	0.0013668
ZNF304	NM_020657	-1.23329	0.0029052
TIMM21	NM_014177	-1.23333	0.00661767
MPC1	NM_016098	-1.23351	0.00697011
MBOAT1	NM_001080480	-1.23354	0.00862198
PIK3R4	NM_014602	-1.23363	0.000222874
NPTX1	NM_002522	-1.23386	0.00466868
CDCA2	NM_152562	-1.23394	0.00451952
DAB2	NM_001343	-1.23412	0.00647038
CERK	NM_022766	-1.23466	0.00932498
HSPA4L	NM_014278	-1.23478	0.00848987
MICB	NM_005931	-1.23479	0.00337697
DHX57	NM_198963	-1.23587	0.00293321
WDR47	NM_001142550	-1.23599	0.00341003
USP5	NM_001098536	-1.23639	0.00413753
GPR180	NM_180989	-1.23655	0.00757517
FAM122B	NM_001170756	-1.23694	0.00409021
NSMF	NM_001130969	-1.23769	0.00601875
AGRN	NM_198576	-1.23769	0.00315875
SREBF1	NM_001005291	-1.23784	0.000500559
HPGDS	NM_014485	-1.2381	0.00988782
SPRTN	NM_001010984	-1.2383	0.00164795
TSPYL2	NM_022117	-1.23992	0.00026658
STK38L	NM_015000	-1.2408	0.00153234
ASCC2	NM_032204	-1.24114	0.00378707
SMPD4	NR_033230	-1.24194	0.00358353
EPB41	NM_203342	-1.24258	0.00252868
USP46	NM_022832	-1.2436	0.00699097
TLCD1	NM_138463	-1.24375	0.00105299
FLVCR1	NM_014053	-1.24464	0.00135161
FBXO5	NM_012177	-1.24564	0.00218636
SNX12	NM_013346	-1.24603	0.000822372
PLPP1	NM_003711	-1.24631	0.00637233
PUSL1	NM_153339	-1.24741	0.000449372
RACGAP1	NM_013277	-1.24839	0.00963198
UGDH	NM_003359	-1.24869	0.000108569
KIFC1	NM_002263	-1.25026	0.00829925
CDH24	NM_022478	-1.25044	0.00630514
PARVA	NM_018222	-1.25153	0.00247921
MGAT2	NM_002408	-1.2525	0.00443871
CDA	NM_001785	-1.2561	0.00914315
USP54	NM_152586	-1.25626	0.0051444
EHD2	NM_014601	-1.25658	0.00753885
MED31	NM_016060	-1.25838	0.00523693
TCF19	NM_007109	-1.25913	0.00445413
DUSP3	NM_004090	-1.26017	0.00189942
WBP2	NM_012478	-1.26083	0.00832921
TTTY9A	NR_001530	-1.26126	0.0088283
MVK	NM_000431	-1.26201	0.00822229
TNFAIP3	NM_006290	-1.26408	0.00486925
PRKCD	NM_006254	-1.26459	0.00434495
NSF	NR_040116	-1.26504	0.00384081
ASPM	NM_018136	-1.26509	0.00274136
HSP90AA1	NM_001017963	-1.26569	0.00163324
SLC9A6	NM_001042537	-1.2657	0.000266272
SPR	NM_003124	-1.26634	0.000649374
PLEKHF2	NM_024613	-1.26649	0.00712664
YOD1	NM_018566	-1.26658	0.000274262
FAM20B	NM_014864	-1.26684	0.0096971
LRRN2	NM_006338	-1.26716	0.00649567
WWTR1	NM_015472	-1.26731	0.00908875
DSC2	NM_024422	-1.26802	0.00281029
GABRE	NM_004961	-1.26883	0.00799234
SNORD99	NR_003077	-1.26949	0.00303479
MIRLET7I	NR_029661	-1.26984	0.00131981
SUCLG1	NM_003849	-1.26993	0.00492505
GALNT11	NM_022087	-1.27139	0.00921254
LDLR	NM_000527	-1.27221	0.00513237
ANKRD52	NM_173595	-1.27283	0.00639316
MTSS1L	NM_138383	-1.27303	0.00638023
ZNF367	NM_153695	-1.27534	0.0059474
SLC4A2	NM_001199692	-1.27662	0.000681469
SIRT7	NM_016538	-1.2767	0.00629127
MGAT5B	NM_198955	-1.27685	0.00732276
SCD	NM_005063	-1.27707	0.000466676
SNTB2	NM_006750	-1.27769	0.00838311
RNF38	NM_194328	-1.27847	0.000532177
BLVRB	NM_000713	-1.27852	0.00875515
IPPK	NM_022755	-1.27906	0.00856802
SPDYE5	NM_001099435	-1.27966	0.00933881
PKDCC	NM_138370	-1.27975	0.00541181
MPP3	NM_001932	-1.27979	0.00350164
LDHD	NM_153486	-1.27985	0.00648792
TMEM158	NM_015444	-1.2804	0.00254219
NAPEPLD	NM_001122838	-1.28151	0.00592516
DPP3	NM_005700	-1.28191	0.00435231
ZNF205	NM_003456	-1.28219	0.00150866
PIP4K2A	NM_005028	-1.28228	0.00180472
SKIDA1	NM_207371	-1.28258	0.00153503
MAP3K3	NM_203351	-1.28314	0.00850912
SCARA3	NM_016240	-1.28371	0.000795945
WDR1	NM_017491	-1.28562	0.000786316
PINK1	NM_032409	-1.28643	0.00386319
EIF4EBP2	NM_004096	-1.2876	0.00568756
CITED2	NM_006079	-1.28793	0.000633105
SEC24A	NM_021982	-1.2882	0.000272423
POP1	NM_001145860	-1.28845	0.00114948
CREB3L2	NM_194071	-1.28861	0.000289251
PGP	NM_001042371	-1.28929	0.00476129
VCP	NM_007126	-1.29104	0.000298604
STX12	NM_177424	-1.29193	0.00473367
CBFA2T3	NM_005187	-1.29392	0.00753198
MMP19	NM_002429	-1.29425	0.00877825
TJP2	NM_004817	-1.29432	0.00406856
ATP6V1A	NM_001690	-1.29529	0.00345313
SCAMP3	NM_005698	-1.29554	0.00764108
SEC24D	NM_014822	-1.29573	0.00164507
PRKAR1B	NM_001164761	-1.29592	0.00168091
ATG4A	NM_052936	-1.29936	0.00997066
PFKL	NR_024108	-1.29987	0.00808689
CHAC2	NM_001008708	-1.30051	0.0035267
SNCG	NM_003087	-1.30063	0.0016753
GAS2L3	NM_174942	-1.30199	0.00391008
GBF1	NM_004193	-1.30396	0.00157773
SGK3	NM_013257	-1.3046	0.00269172
ZNF92	NM_007139	-1.30669	0.00772807
MFN2	NM_014874	-1.30712	0.00824915
PHTF2	NM_001127357	-1.30719	8.9317e-05
SNX31	NM_152628	-1.30845	0.00943097
GLE1	NM_001003722	-1.30929	0.00204107
LRRC58	NM_001099678	-1.30957	0.00350018
HSPA5	NM_005347	-1.31124	8.6157e-05
CDKN3	NM_005192	-1.31264	0.00668909
GSR	NM_000637	-1.31327	0.000333279
SC5D	NM_006918	-1.31381	0.00206399
KCNAB2	NM_003636	-1.31469	0.00410307
ME1	NM_002395	-1.31579	0.00487045
SLC26A4	NM_000441	-1.31588	0.000419608
UPRT	NR_030774	-1.31815	0.000406342
SLC25A4	NM_001151	-1.31937	0.00728304
MECOM	NM_004991	-1.31961	0.00380268
PRADC1	NM_032319	-1.31962	0.0012316
MICA	NR_036523	-1.32103	0.00450436
RHOD	NM_014578	-1.32184	0.00758042
PSMD1	NM_002807	-1.32356	0.00713775
UNC13B	NM_006377	-1.32398	0.00205942
LOC81691	NM_001199053	-1.32467	0.00330459
UNC13D	NM_199242	-1.32497	0.000767536
NDRG3	NM_032013	-1.32521	0.00760232
ATP6V0A1	NM_001130020	-1.32549	0.00281997
EPB41L1	NM_012156	-1.32574	0.00586093
RAP1GAP	NM_001145657	-1.32621	0.00150101
MAMDC2	NM_153267	-1.32703	0.00100315
SQLE	NM_003129	-1.32734	0.00274139
ARL6IP5	NM_006407	-1.32759	0.000306182
ARL2BP	NM_012106	-1.3277	0.00596065
ALG14	NM_144988	-1.32771	0.00696381
DNAJB1	NM_006145	-1.32822	0.00067832
GAS1	NM_002048	-1.32844	0.00359378
SCML2	NM_006089	-1.32844	0.00983958
VAV3	NM_006113	-1.32857	0.00541471
PPARGC1B	NM_133263	-1.33037	0.00828936
FAM126B	NM_173822	-1.33208	0.00145542
PDCD4	NM_145341	-1.33247	0.0012269
OSBPL5	NM_020896	-1.33253	0.00359174
RNF40	NM_014771	-1.33265	0.00578256
TMEM133	NM_032021	-1.33297	0.00610358
ABCD3	NM_002858	-1.334	0.000125484
CHKA	NM_001277	-1.33843	0.00130663
SLC44A2	NM_020428	-1.33854	0.00811881
MITF	NM_198177	-1.33856	0.00519291
ABCG2	NM_004827	-1.33951	0.00282457
GNB4	NM_021629	-1.34067	0.0065479
ARHGAP17	NM_001006634	-1.34081	0.0065459
USH1C	NM_153676	-1.3423	0.00976545
KATNAL1	NM_032116	-1.34264	0.00184311
FAM106CP	NR_026810	-1.34403	0.000203334
ABHD4	NM_022060	-1.34467	0.00138783
SLC2A1-AS1	NR_033967	-1.34473	0.000362945
LGALS8	NM_201544	-1.34513	0.0036745
L1CAM	NM_000425	-1.34565	0.0037815
DDAH1	NM_001134445	-1.34657	0.000210225
UST	NM_005715	-1.34675	0.0053764
E2F7	NM_203394	-1.34678	0.00146517
TRIM5	NM_033092	-1.34932	0.00440887
ZCCHC2	NM_017742	-1.34966	0.00752996
AP2B1	NM_001030006	-1.35126	0.000587289
LMNA	NM_170707	-1.35167	0.000157454
DOCK10	NM_014689	-1.35322	0.0073549
SPAG5	NM_006461	-1.35361	0.000390447
LBR	NM_002296	-1.3546	0.000308364
LL0XNC01-250H12.3	XR_109768	-1.35482	6.2457e-05
GDE1	NM_016641	-1.35542	0.000533191
UHRF1BP1L	NM_015054	-1.35554	0.0086433
TMEM50B	NR_040016	-1.35587	0.00311694
WDR66	NM_144668	-1.36326	0.00475846
E2F8	NM_001256371	-1.3634	0.00895687
HCFC2	NM_013320	-1.36702	0.00480643
CNKSR3	NM_173515	-1.36718	0.000357396
SHQ1	NM_018130	-1.36849	0.00372238
CARD10	NM_014550	-1.37185	0.00481834
DAGLA	NM_006133	-1.37213	0.000554975
DNAJC3	NM_006260	-1.37321	0.00513087
TDG	NM_003211	-1.37397	0.000563568
E2F1	NM_005225	-1.37553	0.000222967
DNAJC6	NM_001256865	-1.37576	0.00578851
ATF5	NM_001193646	-1.37599	0.00162207
HYAL1	NR_047690	-1.3765	0.00741913
ETS1	NM_001143820	-1.37848	0.00394679
SYNPO	NM_001166209	-1.37863	0.001058
NPR3	NM_001204375	-1.37872	0.00187408
ADCY6	NM_015270	-1.37942	0.00577368
OR2V2	NM_206880	-1.38057	0.00588226
KIF20A	NM_005733	-1.38113	0.00875884
SELENBP1	NM_001258289	-1.38762	8.9924e-05
RP2	NM_006915	-1.38894	0.000932445
TREX1	NM_016381	-1.3892	0.00306514
DNMT3L	NM_013369	-1.38991	0.00157699
PTH1R	NM_000316	-1.39087	0.00998092
HMGCR	NM_000859	-1.39153	0.000940134
MAPK4	NM_002747	-1.39287	0.00430769
PDE4DIP	NM_014644	-1.39584	0.00456471
HSPA1L	NM_005527	-1.39761	0.000519693
PGAM1	NM_002629	-1.40198	0.00172968
HSPH1	NM_006644	-1.40389	0.000450513
MYPN	NR_045662	-1.40446	0.000475423
EDN1	NM_001955	-1.40844	0.00720904
CHORDC1	NM_012124	-1.412	0.00979783
BMF	NM_001003940	-1.41276	0.00269018
NR4A3	NM_173200	-1.41368	0.00883138
ABCC2	NM_000392	-1.41496	0.00178443
SNAP25	NM_003081	-1.4155	0.00035556
TRAFD1	NM_001143906	-1.41584	0.00527603
MYBL1	NM_001080416	-1.4186	0.0053946
NPR1	NM_000906	-1.42087	0.00998968
KBTBD6	NM_152903	-1.42343	4.6278e-05
PIM2	NM_006875	-1.42368	0.0054582
HMGCS1	NM_001098272	-1.42491	7.399e-05
ARHGAP18	NM_033515	-1.426	0.00332489
SCFD2	NM_152540	-1.42745	0.00630747
STEAP3	NM_182915	-1.43012	0.000348796
ICK	NM_016513	-1.43186	0.000913851
DCT	NM_001129889	-1.43353	0.00854864
WNT10B	NM_003394	-1.43601	0.00673145
ZNF654	NM_018293	-1.43797	0.00279245
PDE3B	NM_000922	-1.44036	0.00108683
IDI1	NM_004508	-1.44356	0.000545188
DCP2	NM_152624	-1.44379	0.00285971
PSMB9	NM_002800	-1.44403	3.1656e-05
PIK3R3	NM_003629	-1.4483	0.00033889
SLC9B2	NM_178833	-1.4509	0.00544331
SLC9A3R1	NM_004252	-1.45308	0.000230545
PLEKHH1	NM_020715	-1.45811	0.00725611
BTG2	NM_006763	-1.46015	0.000336716
TAP1	NM_000593	-1.46234	0.00101945
ELOVL6	NM_024090	-1.46285	0.000575531
FAM98A	NM_015475	-1.46395	0.000274617
PRSS8	NM_002773	-1.46492	0.00976224
NCS1	NM_014286	-1.47079	0.0020929
SFXN3	NM_030971	-1.48029	0.00229424
SPCS3	NM_021928	-1.4807	0.00112664
CCNE2	NM_057749	-1.48628	0.000606471
MXRA7	NM_001008528	-1.48935	0.00985003
NRG2	NM_004883	-1.49266	0.00548399
	NM_001630	-1.49519	0.00956413
MAP3K14	NM_003954	-1.49689	0.00431336
WIPF1	NM_003387	-1.49872	0.00689165
FBXO9	NM_033480	-1.49884	2.0686e-05
ID3	NM_002167	-1.50018	0.00102953
ADGRG1	NM_001145772	-1.50491	0.000463229
NECAB3	NM_031232	-1.50898	0.00324671
ENO3	NM_001976	-1.51038	0.00345009
SPDEF	NM_012391	-1.51245	0.00174975
MPC2	NM_001143674	-1.51291	0.00528051
SYBU	NM_001099744	-1.51822	0.00442049
KIAA0825	NM_001145678	-1.52236	0.00427804
LPIN1	NM_001261427	-1.52641	0.00568297
FASN	NM_004104	-1.52699	0.0017116
KLHL13	NM_033495	-1.52884	0.00476724
OGDH	NM_002541	-1.53161	0.000135886
LINC00987	NR_036466	-1.53767	0.000720874
LINC00052	NR_026869	-1.54849	0.00120335
ANXA8	NM_001040084	-1.55231	0.00123864
CDC42EP4	NM_012121	-1.55406	0.000324206
ACSL5	NM_016234	-1.55443	2.8497e-05
EMP3	NM_001425	-1.55537	0.000104578
PTRF	NM_012232	-1.56069	0.00111632
GLCE	NM_015554	-1.56373	0.0023238
SEMA7A	NM_003612	-1.57615	0.00601995
UBL3	NM_007106	-1.5972	0.00271545
DLX3	NM_005220	-1.59905	0.00866766
HEY1	NM_012258	-1.60012	0.000629978
USP2	NM_004205	-1.60056	0.003298
FOXP2	NR_033766	-1.60105	0.00157148
INSIG1	NM_005542	-1.60292	0.00124761
CYB5R1	NM_016243	-1.60446	0.00251341
SEMA6D	NM_001198999	-1.60467	0.000168074
MIR568	NR_030293	-1.61462	0.000859309
LSS	NM_002340	-1.62853	0.000151782
MCF2	NM_001099855	-1.63579	9.5662e-05
ANXA8L1	NM_001098845	-1.63781	0.000248217
BRINP3	NM_199051	-1.63841	0.0014372
PIR-FIGF	NR_037859	-1.64124	0.00702962
IL17RC	NM_153460	-1.64332	0.00283403
PCYT2	NR_033683	-1.64678	0.000228412
DIO2	NM_001242502	-1.65232	0.00540395
SDF2L1	NM_022044	-1.65496	0.000457777
RAB11FIP4	NM_032932	-1.65717	0.000154137
SLC2A1	NM_006516	-1.66402	0.000399419
TMOD1	NM_001166116	-1.66721	0.00211047
PLCD4	NM_032726	-1.6701	0.00538087
KCNIP3	NM_013434	-1.68185	0.0035256
FRK	NM_002031	-1.68221	0.000113899
NRG4	NM_138573	-1.69276	0.00200835
OLFML2A	NM_182487	-1.6939	0.00266001
PXMP4	NM_007238	-1.72064	0.000678153
HSPA1B	NM_005346	-1.73274	5.6535e-05
HSPB7	NM_014424	-1.75188	0.00210854
P2RY6	NM_176796	-1.75285	0.000472974
IL6R	NM_000565	-1.76384	0.00740974
IL17RE	NM_153480	-1.77503	0.00192122
FAM46B	NM_052943	-1.78836	0.00245986
P2RY2	NM_176072	-1.80655	0.00117436
HSPA1A	NM_005345	-1.82008	8.4592e-05
SERPINI1	NM_005025	-1.82742	0.0017493
CRABP2	NM_001878	-1.82765	0.00191471
FAT4	NM_024582	-1.8349	0.000129492
MYLK4	NM_001012418	-1.83869	0.00238322
MYLK3	NM_182493	-1.90101	0.00392756
OGN	NM_033014	-1.96163	0.000426773
TBXA2R	NM_001060	-1.99009	0.00117562
CACNB2	NM_201596	-2.12915	6.1505e-05
FA2H	NM_024306	-2.17558	0.000989849
GPR155	NM_001267050	-2.30266	0.00044359
KRT13	NM_153490	-3.84911	0.00298343

## Sheet: Fatty Acid TF Enrichment
Transcription Factors
Network Object Name	Actual	n	R	N	Expected	Ratio	p-value	z-score	Rank
PPAR-gamma	66	1310	322	21873	19.28	3.422	6.933e-19	11.05	1
SP1	181	1310	1618	21873	96.9	1.868	6.37e-17	9.156	2
c-Myc	245	1310	2461	21873	147.4	1.662	1.823e-16	8.802	3
c-Fos	61	1310	357	21873	21.38	2.853	9.976e-14	8.91	4
c-Jun	102	1310	825	21873	49.41	2.064	2.027e-12	7.866	5
C/EBPalpha	58	1310	397	21873	23.78	2.439	2.731e-10	7.305	6
CREB1	399	1310	5100	21873	305.4	1.306	5.426e-10	6.304	7
RelA (p65 NF-kB subunit)	102	1310	914	21873	54.74	1.863	7.665e-10	6.73	8
PPAR-alpha	36	1310	201	21873	12.04	2.99	3.144e-09	7.156	9
Androgen receptor	103	1310	979	21873	58.63	1.757	1.483e-08	6.114	10
C/EBPbeta	75	1310	638	21873	38.21	1.963	1.685e-08	6.23	11
HSF1	43	1310	283	21873	16.95	2.537	1.725e-08	6.569	12
ESR1 (nuclear)	123	1310	1244	21873	74.5	1.651	2.164e-08	5.967	13
E2F1	90	1310	828	21873	49.59	1.815	2.792e-08	6.034	14
SREBP1 (nuclear)	27	1310	140	21873	8.385	3.22	5.872e-08	6.651	15
PPAR-beta(delta)	25	1310	124	21873	7.427	3.366	7.272e-08	6.67	16
STAT1	48	1310	351	21873	21.02	2.283	7.725e-08	6.118	17
RUNX2	31	1310	179	21873	10.72	2.892	8.535e-08	6.414	18
ChREBP	18	1310	73	21873	4.372	4.117	2.059e-07	6.733	19
RXRA	32	1310	196	21873	11.74	2.726	2.17e-07	6.127	20
ERR1	32	1310	200	21873	11.98	2.672	3.475e-07	5.994	21
NANOG	78	1310	731	21873	43.78	1.782	5.042e-07	5.425	22
VDR	35	1310	238	21873	14.25	2.455	7.948e-07	5.698	23
EGR1	54	1310	449	21873	26.89	2.008	8.432e-07	5.448	24
HSF4	9	1310	21	21873	1.258	7.156	1.47e-06	7.123	25
SRF	49	1310	404	21873	24.2	2.025	2.112e-06	5.249	26
HNF4-alpha	59	1310	523	21873	31.32	1.884	2.191e-06	5.162	27
MEF2A	18	1310	86	21873	5.151	3.495	2.72e-06	5.851	28
TR-alpha	22	1310	123	21873	7.367	2.986	3.591e-06	5.576	29
SMAD3	36	1310	265	21873	15.87	2.268	3.702e-06	5.243	30
C/EBPdelta	26	1310	162	21873	9.702	2.68	4.008e-06	5.416	31
SP3	57	1310	512	21873	30.66	1.859	4.869e-06	4.963	32
TEF-1	17	1310	81	21873	4.851	3.504	4.918e-06	5.699	33
NRF2	31	1310	216	21873	12.94	2.396	5.554e-06	5.205	34
p53	111	1310	1221	21873	73.13	1.518	6.34e-06	4.701	35
KLF4	41	1310	328	21873	19.64	2.087	6.728e-06	5.007	36
SOX2	64	1310	609	21873	36.47	1.755	8.697e-06	4.767	37
NF-kB p50/p50	15	1310	69	21873	4.132	3.63	1.119e-05	5.522	38
HIF1A	70	1310	691	21873	41.38	1.691	1.164e-05	4.662	39
Fra-1	18	1310	96	21873	5.75	3.131	1.38e-05	5.281	40
TFIIB	16	1310	79	21873	4.731	3.382	1.496e-05	5.353	41
ERR3	19	1310	109	21873	6.528	2.91	2.372e-05	5.047	42
Oct-3/4	111	1310	1261	21873	75.52	1.47	2.595e-05	4.337	43
c-Rel (NF-kB subunit)	29	1310	215	21873	12.88	2.252	3.602e-05	4.657	44
HNF1-alpha	33	1310	260	21873	15.57	2.119	3.791e-05	4.582	45
GCR	52	1310	487	21873	29.17	1.783	3.899e-05	4.41	46
RFX6	11	1310	44	21873	2.635	4.174	4.179e-05	5.32	47
TITF1	17	1310	96	21873	5.75	2.957	5.096e-05	4.85	48
HNF3-beta	36	1310	299	21873	17.91	2.01	5.332e-05	4.44	49
NF-kB1 (p50)	49	1310	457	21873	27.37	1.79	5.808e-05	4.309	50
IRF8	33	1310	267	21873	15.99	2.064	6.438e-05	4.414	51
FosB	13	1310	63	21873	3.773	3.445	7.581e-05	4.906	52
ATF-3	24	1310	170	21873	10.18	2.357	7.975e-05	4.484	53
FXR	23	1310	161	21873	9.642	2.385	9.27e-05	4.453	54
USF1	28	1310	216	21873	12.94	2.164	9.866e-05	4.341	55
SOX4	18	1310	111	21873	6.648	2.708	0.0001024	4.552	56
ROR-alpha	16	1310	94	21873	5.63	2.842	0.0001365	4.517	57
SOX9	24	1310	176	21873	10.54	2.277	0.0001382	4.293	58
PR (nuclear)	31	1310	255	21873	15.27	2.03	0.0001434	4.175	59
IRF2	14	1310	76	21873	4.552	3.076	0.0001484	4.575	60
MLX	5	1310	10	21873	0.5989	8.348	0.0001495	5.866	61
LXR-alpha	17	1310	105	21873	6.289	2.703	0.0001611	4.416	62
Oct-2	10	1310	44	21873	2.635	3.795	0.0002189	4.684	63
YY1	95	1310	1111	21873	66.54	1.428	0.0002778	3.693	64
NF-AT5	8	1310	30	21873	1.797	4.453	0.0002896	4.776	65
RARbeta	11	1310	55	21873	3.294	3.339	0.0003558	4.384	66
IRF7	9	1310	39	21873	2.336	3.853	0.0003983	4.501	67
C/EBP zeta	15	1310	93	21873	5.57	2.693	0.0004002	4.13	68
TBP	19	1310	134	21873	8.025	2.367	0.0004019	4.008	69
NFYB	20	1310	146	21873	8.744	2.287	0.0004532	3.939	70
ZNF145	10	1310	48	21873	2.875	3.479	0.000464	4.339	71
RelB (NF-kB subunit)	24	1310	191	21873	11.44	2.098	0.0004773	3.847	72
AP-2A	31	1310	273	21873	16.35	1.896	0.0004796	3.76	73
HOXB4	9	1310	40	21873	2.396	3.757	0.000487	4.405	74
ETS1	40	1310	388	21873	23.24	1.721	0.0005908	3.618	75
BMAL1	17	1310	117	21873	7.007	2.426	0.0005977	3.904	76
FLI1	17	1310	117	21873	7.007	2.426	0.0005977	3.904	77
PU.1	40	1310	389	21873	23.3	1.717	0.0006215	3.601	78
FOXE1	6	1310	19	21873	1.138	5.273	0.0006292	4.703	79
IRF4	43	1310	428	21873	25.63	1.677	0.0006423	3.573	80
ATF-4	20	1310	150	21873	8.984	2.226	0.0006443	3.804	81
NF-kB2 (p100)	5	1310	13	21873	0.7786	6.422	0.0006561	4.936	82
Fra-2	13	1310	78	21873	4.672	2.783	0.0006936	3.981	83
ELF3	8	1310	34	21873	2.036	3.929	0.0007256	4.314	84
NF-kB1 (p105)	12	1310	69	21873	4.132	2.904	0.0007445	3.998	85
USF2	19	1310	142	21873	8.505	2.234	0.0008326	3.724	86
MCR	7	1310	27	21873	1.617	4.329	0.0008362	4.368	87
STAT3	60	1310	661	21873	39.59	1.516	0.0008858	3.398	88
JunB	19	1310	143	21873	8.564	2.218	0.0009074	3.69	89
NFYA	22	1310	177	21873	10.6	2.075	0.0009313	3.626	90
EAR2	5	1310	14	21873	0.8385	5.963	0.0009705	4.689	91
FOXO3A	26	1310	225	21873	13.48	1.929	0.00102	3.537	92
GATA-1	39	1310	387	21873	23.18	1.683	0.001057	3.42	93
IRF1	24	1310	202	21873	12.1	1.984	0.001064	3.546	94
NeuroD1 (NDF1)	12	1310	72	21873	4.312	2.783	0.0011	3.824	95
GRHL2	12	1310	73	21873	4.372	2.745	0.001246	3.769	96
AML1 (RUNX1)	32	1310	302	21873	18.09	1.769	0.001275	3.397	97
PAX6	18	1310	138	21873	8.265	2.178	0.001513	3.503	98
PRDM14	8	1310	38	21873	2.276	3.515	0.00158	3.917	99
ZIC3	7	1310	30	21873	1.797	3.896	0.001638	4.006	100
ATH1	12	1310	76	21873	4.552	2.636	0.001783	3.607	101
SREBP1 precursor	10	1310	57	21873	3.414	2.929	0.001879	3.681	102
E2F7	9	1310	48	21873	2.875	3.131	0.001942	3.73	103
THB Beta-1	4	1310	10	21873	0.5989	6.679	0.002009	4.534	104
AHR	30	1310	286	21873	17.13	1.751	0.002073	3.229	105
NF-AT2(NFATC1)	17	1310	131	21873	7.846	2.167	0.002132	3.381	106
JunD	23	1310	202	21873	12.1	1.901	0.00234	3.248	107
FoxL2	10	1310	59	21873	3.534	2.83	0.002453	3.553	108
SREBP2 (nuclear)	11	1310	69	21873	4.132	2.662	0.002522	3.49	109
IRF3	9	1310	50	21873	2.995	3.005	0.002606	3.583	110
FOXD3	8	1310	41	21873	2.456	3.258	0.002632	3.653	111
YB-1	17	1310	134	21873	8.025	2.118	0.002717	3.277	112
KLF11 (TIEG2)	7	1310	33	21873	1.976	3.542	0.002937	3.688	113
EBF2	4	1310	11	21873	0.6588	6.072	0.003008	4.247	114
AP-2C	16	1310	125	21873	7.486	2.137	0.003263	3.218	115
E2A	16	1310	126	21873	7.546	2.12	0.003535	3.183	116
Miz-1	15	1310	116	21873	6.947	2.159	0.003914	3.159	117
NUR77	10	1310	63	21873	3.773	2.65	0.004021	3.311	118
MEF2D	13	1310	95	21873	5.69	2.285	0.004296	3.168	119
HMG2	4	1310	12	21873	0.7187	5.566	0.004299	3.993	120
POU4F2	5	1310	19	21873	1.138	4.394	0.004387	3.736	121
ATF-2	20	1310	176	21873	10.54	1.897	0.004448	3.017	122
b-Myb	13	1310	96	21873	5.75	2.261	0.004704	3.125	123
RARalpha	17	1310	142	21873	8.505	1.999	0.004956	3.014	124
SMAD4	24	1310	227	21873	13.6	1.765	0.004971	2.926	125
CLOCK	12	1310	86	21873	5.151	2.33	0.005082	3.119	126
E2F3	20	1310	179	21873	10.72	1.866	0.005373	2.935	127
PEG3	6	1310	28	21873	1.677	3.578	0.005502	3.445	128
STAT6	36	1310	385	21873	23.06	1.561	0.005526	2.804	129
C/EBPgamma	5	1310	20	21873	1.198	4.174	0.005565	3.585	130
CTCF	18	1310	156	21873	9.343	1.927	0.005758	2.931	131
ATF-5	4	1310	13	21873	0.7786	5.138	0.005918	3.766	132
HOXD10	3	1310	7	21873	0.4192	7.156	0.006251	4.111	133
NF-AT1(NFATC2)	14	1310	111	21873	6.648	2.106	0.006502	2.948	134
PAX5	17	1310	146	21873	8.744	1.944	0.006543	2.889	135
ERR2	11	1310	78	21873	4.672	2.355	0.006597	3.025	136
FKHR	28	1310	284	21873	17.01	1.646	0.006717	2.767	137
DLX5	6	1310	30	21873	1.797	3.339	0.007831	3.236	138
CSX (Nkx2.5)	12	1310	92	21873	5.51	2.178	0.008697	2.858	139
NURR1	7	1310	40	21873	2.396	2.922	0.008907	3.071	140
Sry	9	1310	60	21873	3.593	2.505	0.009018	2.945	141
TAF1	6	1310	31	21873	1.857	3.232	0.009228	3.138	142
DMTF1	3	1310	8	21873	0.4791	6.261	0.009559	3.757	143
PURB	3	1310	8	21873	0.4791	6.261	0.009559	3.757	144
Lef-1	17	1310	152	21873	9.103	1.867	0.009669	2.709	145
p63	38	1310	427	21873	25.57	1.486	0.009747	2.559	146
COUP-TFII	13	1310	105	21873	6.289	2.067	0.009937	2.767	147
CUX1 (p110)	99	1310	1313	21873	78.64	1.259	0.01022	2.443	148
E2F6	12	1310	94	21873	5.63	2.132	0.01027	2.775	149
JDP2	4	1310	15	21873	0.8984	4.453	0.01027	3.376	150
SREBP2 precursor	4	1310	15	21873	0.8984	4.453	0.01027	3.376	151
Bcl-6	17	1310	153	21873	9.163	1.855	0.01029	2.679	152
PMX2	2	1310	3	21873	0.1797	11.13	0.01032	4.429	153
SPBP	2	1310	3	21873	0.1797	11.13	0.01032	4.429	154
TEF-3	10	1310	72	21873	4.312	2.319	0.0104	2.83	155
C/EBPepsilon	6	1310	32	21873	1.917	3.131	0.0108	3.044	156
HOXD13	6	1310	32	21873	1.917	3.131	0.0108	3.044	157
NRF1	16	1310	142	21873	8.505	1.881	0.01106	2.659	158
TWIST1	15	1310	131	21873	7.846	1.912	0.01185	2.642	159
XBP1	17	1310	156	21873	9.343	1.82	0.01234	2.593	160
SP7	5	1310	24	21873	1.437	3.479	0.01251	3.066	161
Elk-3	4	1310	16	21873	0.9583	4.174	0.01305	3.206	162
IRX3	4	1310	16	21873	0.9583	4.174	0.01305	3.206	163
STAT5A	14	1310	121	21873	7.247	1.932	0.01352	2.594	164
FOXJ3	3	1310	9	21873	0.539	5.566	0.01371	3.458	165
HES6	3	1310	9	21873	0.539	5.566	0.01371	3.458	166
HOXC8	3	1310	9	21873	0.539	5.566	0.01371	3.458	167
NRB54	3	1310	9	21873	0.539	5.566	0.01371	3.458	168
OVOL2	3	1310	9	21873	0.539	5.566	0.01371	3.458	169
SOX1	3	1310	9	21873	0.539	5.566	0.01371	3.458	170

## Sheet: GSE21023
Gene	Signal
Pik3c2g	3.65624
Pdk4	3.5938
Acot1	2.17897
Retsat	2.16044
Aqp7	2.06639
Nudt7	1.80011
Ucp2	1.69469
Hmgcs2	1.58173
Lipe	1.57307
LOC100911615	1.51011
Plin2	1.44788
Ech1	1.38154
Plbd1	1.22366
Decr1	1.22057
Cd36	1.20982
Fitm2	1.17729
Ucp3	1.135
Eci2	1.0798
Acsl1	1.06015
Slc25a20	1.05663
Etfdh	1.02009
Mlycd	1.00972
Crat	0.986252
Cpt1a	0.979943
Impa2	0.917134
Plin5	0.913952
Cbr1	0.897215
Cidea	0.884272
Arfip2	0.879532
Plpp3	0.866449
Chkb	0.862961
Lix1l	0.861091
Cpt1b	0.851306
Sparc	0.797448
Pxdc1	0.777769
Ptp4a1	0.770284
Acox1	0.72789
Mppe1	0.727864
Fabp3	0.715057
Acaa2	0.709373
Rab30	0.651564
Idi1	0.651238
Acad11	0.608415
Cpt2	0.608021
Scn3b	0.591056
Slc27a1	0.571639
Hadhb	0.570113
Ppcs	0.558537
Serpine2	0.534862
Ephx2	0.531332
LOC100911356	0.528371
Upp1	0.523781
Pex11a	0.522195
Acot2	0.504912
Slc25a34	0.489189
Slc40a1	0.481664
Angptl4	0.479207
Lpar1	0.465258
Artn	0.463119
Acot7	0.438928
Txnip	0.438584
Cyr61	0.43376
Dbi	0.429122
Gpam	0.423679
Pi4kb	0.405416
Fbp1	0.404273
Klf10	0.40026
Glrx	0.398736
Ppp2ca	0.395928
Rhob	0.370542
Hsd17b4	0.37032
Eif3a	0.355975
Sc5d	0.355378
Hsd17b10	0.352527
Slc4a4	0.345937
Slc22a3	0.342774
Rad21	0.338113
Cracr2b	0.295381
Acadl	0.288974
Faim	0.286219
Trit1	0.27506
Fastkd3	0.274201
Trove2	0.262259
Bcl2l14	0.260262
Acsl4	0.255351
Ripply2	0.253563
Zfyve16	0.253059
Cox6a1	0.246976
Rasd2	0.241295
Ptgr2	0.240501
Myo5b	0.237166
Eif4a2	0.230419
Stx12	0.230286
Bdnf	0.226338
Rabgef1	0.223267
Atcay	0.222441
Dram2	0.21853
Adamts2	0.209483
Bsdc1	0.208493
Laptm4b	0.20821
Slc25a30	0.204434
Bpi	0.200948
Nop14	0.200944
Efhb	0.1979
Epas1	0.187983
Hnrnpm	0.186259
Dync1i1	0.180808
Ly49i7	0.180558
Olr150	0.179672
Fnbp1l	0.176018
Ctsm	0.175076
Slc44a4	0.169215
Rnf217	0.167175
Slc17a9	0.164006
Fbp1	0.163379
Tgoln2	0.159312
LOC100362344	0.157235
Sorcs2	0.157108
Pglyrp1	0.155191
Olr903	0.155093
Gfpt1	0.15365
Zmiz1	0.152839
Olr244	0.15207
Cmtr2	0.150258
Klf11	0.150058
Kazald1	0.147713
Olr828	0.146536
Gipc2	0.143236
Usp32	0.142749
Olr1345	0.141773
Ablim3	0.141448
Mfsd4	0.141441
Hpse	0.14081
Palb2	0.140361
Fam161a	0.14001
Ocln	0.138812
Parvb	0.137684
Msl3	0.136224
Ush1g	0.136011
Lhx9	0.134157
Olr1411	0.133849
Tceal3	0.133444
Hcst	0.133105
Fam81a	0.1327
Wdr26	0.132642
Olr1138	0.130057
E230034O05Rik	0.129613
Tspan14	0.127873
Pum3	0.127284
Ankrd27	0.127249
Cyp2j16	0.126857
LOC299282	0.126623
Dnase2b	0.126392
Olr845	0.126139
Dcstamp	0.125624
Olr387	0.124928
Kctd11	0.124539
B3galt5	0.123339
Grk1	0.123058
Olr883	0.122793
Abhd12b	0.12222
Olr1227	0.122161
Olr110	0.121838
Fam114a1l1	0.120051
Polr2g	0.119439
Prpmp5	0.119299
Pde4c	0.119028
Mrm1	0.118993
Rab22a	0.117522
Olr466	0.117136
Klf17	0.116737
Batf3	0.11644
Olr1159	0.115636
Dgcr8	0.115478
Prdm9	0.114526
Epn2	0.114216
Slc9a7	0.114163
Cyp26b1	0.114116
Olr115	0.113564
Col1a1	0.113433
Gjc2	0.113315
Amdhd1	0.112646
Rnf44	0.112634
Olr1232	0.111496
Syt3	0.11049
Capza3	0.109777
Sppl2c	0.109724
Dpp6	0.109417
Akr1e2	0.109263
Dpep1	0.107874
Moxd2	0.107542
Abcb8	0.10719
Vom2r56	0.106247
Thrsp	0.106044
Olr1193	0.105863
Arap2	0.105732
Ppargc1b	0.105696
Cbarp	0.105038
Hoxd3	0.104104
Flrt1	0.103823
Ubp1	0.1037
Ccp110	0.102421
LOC100361934	0.101735
Ccnb3	0.0998219
Lipg	0.099428
LOC499542	0.0980962
N4bp2l1	0.0977454
Olr670	0.0975461
Reep6	0.0964647
Capzb	0.0963154
Stxbp4	0.0960692
Mogat1	0.0958488
Olr285	0.0956905
RGD1306750	0.0953641
C8a	0.0947768
Snap25	0.094594
Ly49i5	0.0940441
Olr132	0.0939806
Bhlhb9	0.0933367
Olr1311	0.0927717
Olr197	0.092418
Ism1	0.0912092
Scml4	0.0906645
Olr305	0.0901595
Ptprc	0.0893858
Pomk	0.0890691
Olr671	0.0888547
Tnfsf11	0.088827
Hck	0.086639
Arhgap42	0.0864743
Olr1264	0.0862731
Fabp6	0.0826001
Tifab	0.0825893
Adgrb3	0.0822582
Ltc4s	0.0816191
Slamf8	0.0791669
Olr1057	-0.0696005
Smarce1l	-0.0722407
Olr1256	-0.0733812
Guca2a	-0.0770491
Fam188b	-0.077565
Serp2	-0.0787239
Padi6	-0.07898
Il12b	-0.0795729
Ugt2b	-0.080692
Sema6c	-0.0837431
Chrm3	-0.0841808
Gpr4	-0.0860543
Olr48	-0.0861321
Pitx3	-0.0868261
Cpne5	-0.0886236
Gfi1	-0.0898007
Mylk	-0.0898771
Ttc9	-0.0899274
Adm2	-0.0902145
Klhl21	-0.0907015
Olr684	-0.0921187
Mrgprb2	-0.0931916
Olr104	-0.0940426
Pklr	-0.0949886
Slc35f2	-0.0953248
Olr357	-0.0953313
Cdk18	-0.0953733
Cst9l	-0.0957784
Cpne8	-0.0978156
Kcnn4	-0.100068
Podnl1	-0.100195
Hsd17b13	-0.101246
Krt42	-0.101294
Ccdc24	-0.101703
Tmem101	-0.101816
Slc9a5	-0.102476
Pinlyp	-0.102638
Fam166a	-0.103492
Fam69b	-0.104649
Vom1r47	-0.105409
Batf	-0.106577
Smtnl1	-0.106908
Olr1707	-0.107201
Klhl1	-0.108723
Oas1a	-0.108808
Ano7	-0.108968
Asmt	-0.111095
Apob	-0.112059
Acvr1c	-0.112822
Tas2r135	-0.113209
Cnot3	-0.113931
Grm8	-0.114636
Rab7b	-0.114981
Zfp329	-0.115628
Rnf112	-0.117504
Adam9	-0.118373
Casp12	-0.118845
Brf2	-0.119268
Slc51b	-0.119355
Gpr31	-0.119464
Cd86	-0.119574
Fam24a	-0.1198
Rbm6	-0.119912
Aoc3	-0.120793
Olr1391	-0.121107
Arsi	-0.122546
Zdhhc24	-0.123033
Camkv	-0.123561
Atxn1	-0.124106
Kdm5a	-0.12496
Igfals	-0.125993
Krt1	-0.127995
Slc39a11	-0.130645
Chac1	-0.132736
Mmp27	-0.132818
Gdap1	-0.133091
Hsp90ab1	-0.133226
Wdr78	-0.134301
Nkain4	-0.134349
Gla	-0.134559
Tex19.1	-0.135105
Nfu1	-0.139937
Apoa2	-0.140878
LOC100361475	-0.141314
LOC100360449	-0.145295
Olr193	-0.145423
Lrrc25	-0.14647
Slc22a2	-0.147854
Clasrp	-0.14966
Ptger3	-0.150429
Trim36	-0.151862
Dscc1	-0.152102
Fgd4	-0.152274
Gbp5	-0.152797
Nsun5	-0.153444
Asic3	-0.153761
Tpm3	-0.154264
Arhgef39	-0.154458
Ung	-0.154944
Rrp1b	-0.154992
Sh3bp4	-0.15586
Naaa	-0.156099
Wisp2	-0.156856
Plxdc2	-0.157977
Chrna1	-0.15813
Icmt	-0.159538
Hunk	-0.162278
Kifc1	-0.16479
Dennd3	-0.16556
Arl3	-0.169117
Dock6	-0.169636
Arl2bp	-0.170208
Ilkap	-0.171959
Kcnq1	-0.17319
Apbb3	-0.173846
Magix	-0.175759
Sipa1l1	-0.176137
Qser1	-0.178306
Faf1	-0.178711
Gtf2f1	-0.179824
Slc6a9	-0.180815
Edaradd	-0.18147
Stx5	-0.184051
Bag1	-0.185504
Tmem189	-0.186793
Gpatch3	-0.187121
Tnnt2	-0.187909
Ccdc116	-0.190898
Ccs	-0.193682
Man2b1	-0.19386
Egfl7	-0.195179
Thap4	-0.197966
Trmu	-0.198708
Zcrb1	-0.199439
Nkiras2	-0.200673
Cda	-0.203018
Dok4	-0.204797
Trim50	-0.206519
Map4k1	-0.207325
Rnaset2	-0.207355
Akr1c19	-0.207836
Gpr108	-0.210861
Aplp2	-0.212237
Prkx	-0.213624
mrpl11	-0.214537
Orai3	-0.217188
Fchsd2	-0.217444
Il18bp	-0.219334
Ptprh	-0.219508
Suv39h1	-0.220332
Gtf2h4	-0.220462
Psmd9	-0.220705
Rdm1	-0.220712
Cops8	-0.222899
Arfgef2	-0.226067
Tapbpl	-0.229037
Cpa2	-0.230237
Rbks	-0.2303
Med12	-0.230938
Ranbp3	-0.232318
Nus1	-0.232409
Nol3	-0.233783
Polrmt	-0.234899
Rbm20	-0.236854
Mcur1	-0.238147
Otud5	-0.238879
Vps72	-0.240062
Cpxm2	-0.240194
Leng1	-0.241588
Pxmp2	-0.241996
Lsm4	-0.242605
Gck	-0.243045
Isyna1	-0.243099
Ntf3	-0.244537
Clu	-0.245013
Gne	-0.245614
Ufc1	-0.246542
Ogfod3	-0.248697
Atp2a2	-0.249767
Pomc	-0.250595
Rtel1	-0.250958
Mettl17	-0.251021
Bok	-0.251065
Wipi2	-0.252173
Hdac1	-0.252351
Prpsap1	-0.252994
Cnksr1	-0.256367
Tmem220	-0.258251
Dnpep	-0.259024
Lancl1	-0.26063
Lpp	-0.260983
Pigs	-0.262494
Hist1h2bo	-0.263952
Adrm1	-0.264478
Nupr2	-0.264646
Flcn	-0.265187
Cnot10	-0.266507
Trim54	-0.267746
Sat2	-0.268535
Hdgfrp2	-0.268725
Ece1	-0.269046
Dgcr6	-0.270627
Mgat4b	-0.271908
Spsb1	-0.273154
F11r	-0.274369
Hes6	-0.274961
Sec14l3	-0.275123
Cox19	-0.276411
Slc25a35	-0.280083
Bckdha	-0.280099
Got2	-0.280652
Cgrrf1	-0.282227
Atp12a	-0.283344
Tufm	-0.286159
Isg20l2	-0.288346
Hsf4	-0.289021
Htra1	-0.289118
Khdrbs3	-0.289236
Rbm10	-0.289843
Gsta1	-0.292894
Cdh13	-0.294247
Osbpl6	-0.29524
Spink8	-0.296572
Pqbp1	-0.296824
Tom1	-0.299351
Prkcq	-0.300217
Raph1	-0.300881
Ndufb9	-0.305
Gpx1	-0.305055
Tmbim1	-0.305987
Dbh	-0.30691
Lgals3bp	-0.307939
Plb1	-0.308814
Dcaf11	-0.310295
Zfp36	-0.311869
Mrps36	-0.312146
Ndufs7	-0.312571
Pdzk1	-0.312617
LOC100911238	-0.313961
Mrps26	-0.314591
Cbx2	-0.316087
A3galt2	-0.317836
Cflar	-0.323237
Timm22	-0.327427
Serpinb9	-0.327547
Carhsp1	-0.328214
Aco2	-0.329774
Ehmt2	-0.331512
Actr3b	-0.332437
Ecm1	-0.333842
Tnni3k	-0.334342
C2	-0.334442
Idh3g	-0.335721
Tesc	-0.336197
Gnb3	-0.338622
Klf15	-0.338753
Tlr2	-0.339971
Aldh4a1	-0.3404
Csf1	-0.341509
Slc25a38	-0.341521
Ak2	-0.342356
Brd9	-0.342818
Flot1	-0.34366
Psmb5	-0.344872
Slc7a5	-0.34779
Basp1	-0.348557
Nup210	-0.350946
Tfdp2	-0.352914
Asb11	-0.355156
Abcc8	-0.360717
Rmi1	-0.361193
Mri1	-0.362502
Rcan2	-0.365851
Sqstm1	-0.370073
Cyp11a1	-0.37677
Cabin1	-0.380016
Dus3l	-0.381993
RGD1303003	-0.382163
Ppp1r16a	-0.382493
Gstk1	-0.384366
Ctnnal1	-0.38831
Igsf9	-0.391985
Acad9	-0.392463
Gchfr	-0.393231
Polr1a	-0.39353
Polr2i	-0.398736
Ctgf	-0.407689
Tmem222	-0.40783
Echs1	-0.411365
Ddt	-0.416707
Mrps7	-0.422622
Sil1	-0.430961
Cd320	-0.433119
Slc2a4	-0.434314
Fibp	-0.440097
Mmaa	-0.441405
Gbp2	-0.441653
Psph	-0.443003
Psmb9	-0.443557
Casp7	-0.448135
Fgd6	-0.462849
Pycard	-0.466986
Rhox2	-0.467789
Pik3ip1	-0.473363
Slc5a3	-0.473808
Dsp	-0.476002
RT1-S3	-0.477174
Slc25a29	-0.481801
Ptgfrn	-0.505615
Bdh1	-0.51213
Gcgr	-0.512607
Mccc1	-0.515591
Bfsp1	-0.515871
Rbl2	-0.527006
Bcat2	-0.560771
Ddit3	-0.572747
Mid1ip1	-0.62658
Coq8a	-0.630361
Stc1	-0.725759
Nupr1l1	-0.730617
Myl2	-0.816187
Rnase1	-0.871632
Cdo1	-0.948978
Fam180a	-1.10819
Hamp	-1.32048

## Sheet: GSE22693
Gene	Signal
Cox8b	5.30572
Galc	5.16669
Slitrk1	4.91307
C78891	4.61664
Cyhr1	4.53324
Mela	4.50606
Apoc4	4.50122
Abcb9	4.40607
Slc5a1	4.39198
Hsd3b5	4.32298
Ahrr	4.18947
Ahr	4.16822
Csn2	4.09783
Gm38422	4.06599
Stx19	4.06509
Sema4b	4.03482
Acss1	4.03421
Slc6a14	4.03382
Depdc7	4.00137
Ppara	3.99489
Cpsf4l	3.89786
Arr3	3.89126
Pax9	3.8776
Lipf	3.84682
Rbfox1	3.84587
Crygb	3.78769
AA517841	3.76089
Zfp42	3.69657
Svs6	3.60737
Proz	3.60026
Ahi1	3.57166
Auh	3.57154
Npy6r	3.4568
Chchd10	3.39208
Elane	3.36577
Obp2a	3.36321
AA517858	3.33389
Rag2	3.33286
Rimklb	3.28904
Elovl7	3.24603
Gfra2	3.24046
Dlgap5	3.22688
Hcn1	3.189
Synpr	3.17507
Vmn1r45	3.17064
Pcnx	3.13252
Klra16	3.12286
Lmbr1	3.10732
Ibsp	3.10624
Adh4	3.09803
Cidea	3.09229
Pcdhb12	3.08966
Ces4a	3.0698
Chst11	3.06437
Chchd10	3.06434
Map4	3.04393
Chrm3	3.03862
Npy5r	3.02244
Vsx1	3.01994
D2Ertd127e	3.00574
C79329	2.97733
Pla2g1b	2.96676
Vmn1r172	2.91581
Ptafr	2.912
Spsb4	2.89734
Slc10a1	2.86834
Cmya5	2.86121
A2m	2.81476
Erlin1	2.79755
Dnaaf1	2.79633
Hao2	2.7875
Psme3	2.75121
Cox7a1	2.74763
Sost	2.73118
Synj2	2.73022
Mtag2	2.72689
Cd3e	2.68867
BC016548	2.6806
5730408K05Rik	2.67444
Fktn	2.65987
Mpl	2.64123
Gad1	2.63857
Elavl2	2.61575
4930421J07Rik	2.5736
Pdk4	2.57309
Gria1	2.57065
Chkb	2.51913
Trim12a	2.50122
Adtrp	2.48479
Noct	2.47444
6330509M05Rik	2.47104
Dusp15	2.44701
Slc25a20	2.43588
Syt9	2.41244
Pou5f1	2.40619
Plin5	2.38901
Cs	2.34369
DXErtd223e	2.31501
Capn8	2.30013
Fgf6	2.2953
Lce3c	2.28327
Ephx2	2.27212
Rad23a	2.25869
Nabp1	2.25645
Slc17a9	2.24785
Gcnt2	2.23431
Oplah	2.23406
Ak4	2.21979
Psmd9	2.21239
Acaa1b	2.1982
Zbed3	2.19133
Olfr544	2.18698
Gm38961	2.17972
Acsl1	2.11062
Acadvl	2.1033
Reep6	2.0995
Tst	2.07586
Hist1h1t	2.0717
Nabp1	2.03366
Etv4	2.00757
Hacl1	2.00522
Rftn2	1.96784
Fuom	1.96146
Lypd3	1.96131
Tuba4a	1.92391
Tmprss11d	1.91436
Adam12	1.9064
Hsd17b12	1.89796
Nup54	1.88189
Syt3	1.88008
Klk6	1.85908
Etfdh	1.85379
Ppa1	1.84049
Mchr1	1.8279
Hsd17b12	1.80411
Nabp1	1.73113
Tuba4a	1.73112
Acsl1	1.73078
Krtap19-1	1.68874
Idh3b	1.59429
Ampd3	-1.56588
Gm12816	-1.59784
Got2	-1.60438
Col5a2	-1.61761
Clu	-1.61966
Pdlim1	-1.62042
Fam114a1	-1.64875
Fbn1	-1.67076
Iqgap1	-1.70928
Flnb	-1.71131
F13a1	-1.71538
Anxa3	-1.75207
Ccna2	-1.75396
Ctnnal1	-1.75478
Ndrg1	-1.75922
0610037L13Rik	-1.79342
Fcgr2b	-1.79882
Mycbp2	-1.79925
Tgfbi	-1.80524
Hip1	-1.81251
Ptprc	-1.81498
Tpm4	-1.81805
Slc7a4	-1.8285
Tor4a	-1.83097
Drg2	-1.83251
Slc44a2	-1.83502
Igfbp5	-1.84175
Atp1b1	-1.84317
Col3a1	-1.86642
Fstl1	-1.873
C1s1	-1.87833
Scd2	-1.88125
Alox5ap	-1.88978
S100a6	-1.901
4930427A07Rik	-1.90523
Gnb4	-1.91681
Grik5	-1.91745
Mfap5	-1.94227
Vim	-1.94416
Kcnk3	-1.95916
Cryab	-1.96577
Gas6	-1.9774
Nup62	-1.97773
Clic3	-1.9794
Dvl2	-1.99733
Ccr1l1	-2.00492
Ccl6	-2.01745
Ripk4	-2.0213
Rian	-2.02248
Elovl6	-2.02782
Lbp	-2.04071
Rcan2	-2.04563
Cox5b	-2.06015
Lyz1	-2.07373
Cnp	-2.08678
Lyz1	-2.098
Fn1	-2.10203
H2-Ea-ps	-2.10937
BC028777	-2.13899
Rnasel	-2.14602
Cotl1	-2.16277
4930430F08Rik	-2.16771
Sorcs1	-2.18895
Syn1	-2.19327
Aqr	-2.21231
Slc17a6	-2.22799
Frmd4b	-2.234
Dnm1	-2.24018
Ear12	-2.24945
Clu	-2.27415
Cysltr1	-2.27423
Upk3b	-2.27566
Ddx49	-2.30173
Sema6b	-2.32188
Crmp1	-2.32616
St8sia2	-2.33498
Bdh1	-2.3455
Adamts5	-2.34996
Pira1	-2.36297
Ccl9	-2.36872
F5	-2.3738
Runx1t1	-2.38587
Ccl6	-2.39193
Cacna1c	-2.39657
Usp36	-2.40122
St6galnac5	-2.41364
Myef2	-2.41603
Thbd	-2.41641
Clu	-2.42094
Ap1g1	-2.45441
Mt2	-2.4679
Usp7	-2.47919
Ccnb2	-2.4804
Dmc1	-2.48576
Nudt10	-2.50128
Tmem191c	-2.51024
Btc	-2.5123
Irak4	-2.51633
Kif2c	-2.53619
Efemp1	-2.54082
Fam234b	-2.54408
Syk	-2.56351
P2ry6	-2.57562
Ppp2cb	-2.59144
Mbd4	-2.60591
Gm13889	-2.61038
Hal	-2.61836
Ptgfrn	-2.6201
Prss23	-2.62704
Rab31	-2.62737
Retnla	-2.63361
Serpinb1a	-2.64272
Bmyc	-2.64978
Stac	-2.65286
B3gnt9	-2.6611
Gpc6	-2.6761
Ppnr	-2.68244
Ccdc102a	-2.69237
Gm3417	-2.70371
Tom1l2	-2.70885
Tesc	-2.71134
Dffb	-2.71388
Zfy2	-2.72589
Cacna2d1	-2.73722
Hpgd	-2.74321
Emp1	-2.7451
Ppp3cc	-2.7492
Ssx2ip	-2.75911
Rasal3	-2.77569
Cebpg	-2.78691
Cfp	-2.78902
Sox4	-2.80644
Dpysl3	-2.80698
Rest	-2.80741
Srrm1	-2.80849
Acta2	-2.81819
Brdt	-2.82287
2610020H08Rik	-2.82617
Tyrp1	-2.8281
Vnn1	-2.83186
E2f3	-2.83284
Ceacam1	-2.8378
Galnt3	-2.84995
Hcls1	-2.85644
Slc5a5	-2.89129
Ildr1	-2.89321
Scml2	-2.9
Cd209b	-2.90325
Rims2	-2.90339
Ano1	-2.93254
Lefty1	-2.94163
Itgav	-2.9462
Pitx1	-2.95323
Limk1	-2.95701
Cd320	-3.03331
Odf2	-3.05006
Rufy3	-3.07788
Klk1b11	-3.08124
Zwilch	-3.09305
Pip4k2b	-3.09475
Klrb1b	-3.12761
Hamp	-3.13105
Phxr4	-3.14405
Dnm2	-3.14937
Tnfsf13b	-3.15513
Hist1h3d	-3.16485
Pm20d1	-3.17749
Zfp82	-3.19504
Obox1	-3.20289
Cox8a	-3.21131
Myof	-3.2323
Slc15a3	-3.23543
Timp4	-3.23937
Dnase1l3	-3.27089
Slc44a4	-3.27271
Ncf1	-3.29568
Scel	-3.30579
Nr2c2	-3.3102
Bst1	-3.3634
Emb	-3.38489
Mfsd6	-3.39308
Nudt16	-3.39562
Top2a	-3.45002
Isl1	-3.45328
Spink1	-3.45344
Spata6	-3.49709
Frk	-3.49983
Epb41l5	-3.50006
Galnt7	-3.54303
Sfrp5	-3.54671
AA408650	-3.57009
Nkx2-6	-3.58995
Ms4a6d	-3.60831
Trdn	-3.61152
Fubp1	-3.61554
Oxtr	-3.73936
Nap1l3	-3.76015
Glipr2	-3.78096
Hspb7	-3.78266
Rnase2a	-3.79276
Tsr2	-3.80244
Mest	-3.88872
Tspyl4	-3.91993
Hoxb5	-4.14361
Iglv1	-4.29501
Ptgs1	-4.32164
Rpgr	-4.63329
Thbs1	-5.19076
Mmp12	-5.42335

## Sheet: GSE42220
Gene	Signal
Scarna13	1.03
Fmod	0.857
Sfrp2	0.634
Hmgn5	0.585
Ogn	0.559
Adgrg6	0.554
Mastl	0.521
Plagl1	0.499
5730471H19Rik	0.477
Clk1	0.465
Itgbl1	0.439
Plat	0.435
Cidea	0.434
Prrg4	0.433
P4ha3	0.427
Ago2	0.423
Mn1	0.417
Zbtb33	0.405
B3galt2	0.402
Itga1	0.4
Cpe	0.387
Krt18	0.378
Il2ra	0.373
Phex	0.358
Pygb	0.353
Psd3	0.352
Mki67	0.35
Malat1	0.347
Olfr806	0.347
Chaf1b	0.346
Tspan18	0.346
Kif26b	0.343
Mum1l1	0.343
Npnt	0.343
Aldh1l1	0.34
Prss23	0.34
Emx2	0.338
Sema3c	0.338
Armcx2	0.336
Clec3b	0.332
Bub1	0.331
Paxbp1	0.33
Cfh	0.328
Islr	0.326
Tex19.1	0.326
Gtf2h1	0.324
Stxbp4	0.324
Hacd4	0.322
Zfp710	0.32
Ncaph	0.317
Lox	0.316
Piezo2	0.316
Atp11c	0.314
Mapkbp1	0.311
Aldh1a3	0.31
Slit2	0.31
Cep350	0.309
Cpne3	0.302
Gxylt2	0.302
Rbm47	0.302
Camk2a	0.3
Farp1	0.3
Fancd2	0.299
Fut8	0.298
Cmip	0.297
Ctdsp1	0.297
Sema3f	0.296
Acap2	0.295
Syt11	0.293
Topbp1	0.292
Ttc28	0.292
Adamts15	0.291
Hexim1	0.291
Sema4g	0.291
Ercc6l2	0.29
Eya4	0.288
Aoc2	0.287
Lnx2	0.287
Asah2	0.284
Pkp4	0.284
Wasf1	0.284
Cxcl12	0.283
Impa1	0.283
Ssc5d	0.282
Gas6	0.28
Dnajc13	0.279
Stat5a	0.278
Trio	0.277
Arl14ep	0.276
Arhgap18	0.274
Ltbp1	0.273
Abi3bp	0.272
Nucks1	0.272
Tarsl2	0.272
Myl9	0.27
Zfp521	0.269
Arhgap11a	0.268
Igsf10	0.268
Rxrg	0.268
Pald1	0.267
Sgsm2	0.267
Olfr960	0.266
Zpbp	0.266
Gltscr1	0.265
Cpa5	0.264
Garnl3	0.263
Hao2	0.263
Svep1	0.263
Pcdh18	0.262
Zfp341	0.262
Klf9	0.261
Zfp706	0.261
Rev3l	0.26
Tbc1d8	0.259
Mgp	0.258
Sipa1l3	0.258
Gpc4	0.257
Zfhx3	0.257
Ncam1	0.256
Setd1b	0.256
Atxn7l1	0.253
Mtss1	0.253
Pi15	0.253
Dicer1	0.252
Strip2	0.252
Rnf38	0.251
Runx1t1	0.251
Nfia	0.249
Sqle	0.249
Mkx	0.248
Ptchd1	0.248
Rasd1	0.248
Ap4e1	0.247
Efna3	0.247
Plcb4	0.247
Lpp	0.246
Setdb2	0.245
Ltn1	0.244
Cand2	0.243
Klhl2	0.243
Glt8d2	0.242
Nrep	0.242
Aebp1	0.241
Crat	0.24
Gp1ba	0.24
Itga6	0.24
Top1mt	0.24
Dlc1	0.239
Ebf2	0.239
Kat2b	0.239
Npr3	0.239
Plpp3	0.238
Ddx6	0.237
Lrpap1	0.236
Hadhb	0.235
Thbs2	0.235
Trabd2b	0.235
Klhdc8b	0.234
Podxl2	0.234
Wnk1	0.234
Angptl1	0.233
Taok1	0.232
Aldh3b3	0.231
Atf1	0.231
Twsg1	0.231
Cldn6	0.23
Glis1	0.23
Tet3	0.23
Col11a1	0.229
Ebf3	0.229
Myo18b	0.229
Zfp148	0.229
Cdh11	0.228
Ptgfrn	0.228
Rad21	0.228
Ddah1	0.227
Ash1l	0.226
Atp1b1	0.226
Slc26a2	0.225
C1s2	0.224
Dock1	0.224
Neil3	0.224
Plekhb2	0.224
Adamts12	0.223
Gipr	0.223
9930021J03Rik	0.222
Gab1	0.222
Jag1	0.222
Lgals12	0.222
Rgma	0.222
Ttll10	0.222
Efnb1	0.221
Rapgef3	0.221
Tcf7l2	0.221
Tbl1xr1	0.22
Sorbs2	0.219
Akap8	0.218
Ebf1	0.218
Pot1a	0.218
Med13l	0.216
Mknk2	0.216
Rhobtb3	0.216
Egfr	0.215
Gstm3	0.215
Lmbrd2	0.215
Maml2	0.215
Slit1	0.215
Vgll3	0.215
Nufip2	0.214
Fnbp1	0.213
Irx2	0.213
Pmepa1	0.212
Cobll1	0.211
Mlxip	0.211
Nol8	0.211
Postn	0.211
Sdpr	0.211
Lrp6	0.21
Shb	0.21
Gli3	0.209
Man2b2	0.209
Npc2	0.209
Fam214a	0.207
Rnf24	0.207
Sh3bp2	0.207
Ccdc15	0.206
Chst11	0.206
Brd4	0.204
Dab2	0.204
Nxpe5	0.204
Ptgfr	0.204
Ric1	0.204
Pycard	0.204
Dmxl1	0.201
Egln3	0.201
Reck	0.201
Cdkl3	0.2
Mir540	0.2
Sec24d	0.2
Foxo1	0.199
Rnf111	0.199
Zeb2	0.199
Kmt2b	0.197
Col6a1	0.196
Rcor1	0.196
Cog7	0.195
Plcl1	0.195
Ppp2r5d	0.195
Plin1	0.193
Sprtn	0.193
Il15ra	0.192
Slc22a30	0.192
Patl1	0.191
Cdca2	0.19
Ddx17	0.189
Tnrc6a	0.189
Ttc21b	0.189
Ccdc180	0.188
Ttc7b	0.186
Extl3	0.185
Epb41l2	0.184
Ptprs	0.183
Rreb1	0.183
Yeats2	0.183
Dido1	0.182
Nudt4	0.182
Sipa1l2	0.182
Zfhx4	0.182
Adcy6	0.181
Ncan	0.18
Ppp2r5c	0.178
Ncor2	0.173
0610007P14Rik	-0.176
Rn28s1	-0.181
Ddrgk1	-0.186
Hprt	-0.189
Timm23	-0.193
Adamts18	-0.196
Nefl	-0.196
AU022751	-0.199
Cyp7b1	-0.203
Spef2	-0.206
Vmn1r89	-0.206
Rpl21	-0.207
Trav12-2	-0.207
Synj2bp	-0.21
Rhoc	-0.211
Rpl12	-0.211
Mrps17	-0.212
Nt5c3	-0.214
Psma5	-0.216
Surf1	-0.216
Tma7	-0.216
Tnfsf4	-0.216
Myc	-0.217
Pla2g2e	-0.217
Gm10913	-0.221
Rpl30	-0.223
Wfdc21	-0.223
Mt1	-0.225
Mafk	-0.226
Eef1e1	-0.229
Hist1h1b	-0.229
Eef1b2	-0.23
Ssr4	-0.23
Actr10	-0.232
Nlrc5	-0.232
Rps8	-0.233
Hsph1	-0.234
Eif2s1	-0.235
Rpl17	-0.235
Fam60a	-0.236
Vmn2r65	-0.237
Hspe1	-0.238
Srp14	-0.239
Mlx	-0.24
Ifi27	-0.242
Bet1l	-0.243
Il6	-0.243
Dpy30	-0.246
Snrpg	-0.246
Gtf2a2	-0.247
Cyp4f18	-0.248
Sec61b	-0.248
Msantd3	-0.25
Ppih	-0.251
Rpl35	-0.251
Minos1	-0.252
Mrps12	-0.252
Rwdd1	-0.254
Hspb1	-0.257
Clec2d	-0.258
Usmg5	-0.258
Rpl11	-0.263
Fopnl	-0.264
Polr1d	-0.265
Gtf2h5	-0.267
Olfr874	-0.269
Ostc	-0.272
Tomm20	-0.272
Mrpl48	-0.273
Magea7-ps	-0.274
Rpl13a	-0.275
Srxn1	-0.275
Sdhaf3	-0.276
Dcps	-0.278
Psma7	-0.279
Mrpl14	-0.28
2410015M20Rik	-0.282
Ppp1r15a	-0.282
Rps21	-0.282
Pcbd2	-0.283
Nubp1	-0.284
Tmem199	-0.285
Dusp6	-0.288
Commd2	-0.289
Atf3	-0.29
Bola1	-0.29
Pstk	-0.29
Ifitm3	-0.292
Junb	-0.292
9130401M01Rik	-0.293
Rps27a	-0.293
Tgif1	-0.298
Lrrc52	-0.302
Triqk	-0.303
Rps27l	-0.304
Snrnp25	-0.304
Ptgir	-0.305
Atp6v0b	-0.307
Rps12-ps16	-0.307
Nme2	-0.309
Sat1	-0.31
Med10	-0.311
Hist1h4b	-0.315
Cnih4	-0.316
Capg	-0.322
Trmt112	-0.322
Gm5617	-0.325
Uqcc2	-0.327
Cxcl10	-0.328
Hint1	-0.329
Rpl35a	-0.33
Ereg	-0.331
Phf11d	-0.331
Gadd45b	-0.334
Bloc1s1	-0.338
Snord96a	-0.338
Mcee	-0.339
Gm5779	-0.341
Amn1	-0.342
Aig1	-0.343
Mrpl21	-0.344
1700071K01Rik	-0.346
Lgals2	-0.35
Tmem182	-0.354
Tomm7	-0.356
Atp5h	-0.361
Ankrd37	-0.364
Tbca	-0.367
Ccl9	-0.369
Ciart	-0.376
BC023105	-0.378
Polr2h	-0.378
Rprl2	-0.385
Mmp11	-0.391
Ccdc116	-0.393
Gm10177	-0.393
Itih4	-0.395
Rps14	-0.397
Cd9	-0.4
Dnajc15	-0.4
Rpa3	-0.401
Naa20	-0.402
S100a8	-0.403
Cox6a2	-0.41
Gm16381	-0.42
Mustn1	-0.424
Snord57	-0.426
Casp4	-0.428
Rps24	-0.428
Adig	-0.434
Ptgs2	-0.435
Immp1l	-0.436
Slc7a11	-0.436
Pdcd10	-0.438
Ier2	-0.447
Med21	-0.452
Gng11	-0.459
Gm10548	-0.484
Cxxc1	-0.489
Lsm7	-0.504
Chchd1	-0.517
Sap30	-0.521
Ifi27l2a	-0.597
Rnu2-10	-0.602
Plppr2	-0.634
I830127L07Rik	-0.635
Car6	-0.636
Egr1	-0.742
Lcn2	-1.04
