# Supplementary material for: TFAP2 transcription factors are regulators of lipid droplet biogenesis
Source: eLife. 2018 Sep 26;7:e36330. doi: 10.7554/eLife.36330 (PMC6170152; doi:10.7554/eLife.36330)
Supplement: Figure 2—source data 3. [file elife-36330-fig2-data3.xlsx]

## Sheet: TFAP2 Sites Per LD Gene
TABLE S4
Gene	Sites		TFAP2A_V1	TFAP2A_V2	TFAP2C_V1	TFAP2C_V2
ABCA1	No Upstream Sequence
ABCA5	0		0	0	0	0
ABCA7	5		0	2	1	2
ABCG1	0		0	0	0	0
ABHD4	No Upstream Sequence
ABHD5	No Upstream Sequence
ACSL3	9		2	2	3	2
ACSL4	0		0	0	0	0
AGT	No Upstream Sequence
AGTR1	0		0	0	0	0
AIFM2	3		1	0	1	1
ALDH3B2	0		0	0	0	0
ALOX15	1		0	1	0	0
ANKRA2	No Upstream Sequence
ANXA2	0		0	0	0	0
APOA1	No Upstream Sequence
APOA2	0		0	0	0	0
APOA4	7		3	2	0	2
APOA5	0		0	0	0	0
APOB	2		1	0	1	0
APOBR	No Upstream Sequence
APOC1	No Upstream Sequence
APOC3	4		2	0	2	0
APOC4	2		0	1	0	1
APOC4-APOC2	2		0	1	0	1
APOE	13		3	2	6	2
APOF	0		0	0	0	0
APOH	0		0	0	0	0
APOL1	8		2	1	3	2
APOL2	0		0	0	0	0
APOL5	0		0	0	0	0
APOM	No Upstream Sequence
APOO	No Upstream Sequence
ARF1	20		5	6	4	5
ATG2A	6		1	2	0	3
ATG2B	No Upstream Sequence
BCAP31	4		0	2	0	2
BSCL2	No Upstream Sequence
CAV1	1		1	0	0	0
CD36	No Upstream Sequence
CDH13	0		0	0	0	0
CETP	4		1	1	0	2
CIDEA	5		0	1	3	1
CIDEB	No Upstream Sequence
CIDEC	0		0	0	0	0
CKAP4	No Upstream Sequence
CLU	1		1	0	0	0
COLEC12	8		1	4	0	3
CRP	0		0	0	0	0
CYB5R3	18		2	5	5	6
DDHD2	0		0	0	0	0
DFFA	No Upstream Sequence
DGAT1	14		2	4	2	6
DGAT2	No Upstream Sequence
EHD1	5		2	1	1	1
FAAH2	0		0	0	0	0
FABP4	0		0	0	0	0
FAF2	0		0	0	0	0
FITM1	No Upstream Sequence
FITM2	1		0	0	1	0
G0S2	0		0	0	0	0
GAPDH	1		0	0	1	0
GBF1	4		1	0	3	0
GIMAP2	0		0	0	0	0
GIMAP7	2		0	1	0	1
GPIHBP1	18		4	4	7	3
HDLBP	No Upstream Sequence
HILPDA	6		2	2	0	2
HPR	0		0	0	0	0
HSD17B11	2		0	1	0	1
HSD17B13	No Upstream Sequence
IRAK1	No Upstream Sequence
LCAT	No Upstream Sequence
LDAH	7		1	3	0	3
LDLR	0		0	0	0	0
LIPC	No Upstream Sequence
LIPE	6		1	2	1	2
LIPG	2		1	0	1	0
LMLN	1		0	1	0	0
LPA	0		0	0	0	0
LPCAT1	14		2	6	3	3
LPCAT2	2		0	1	1	0
LPL	0		0	0	0	0
LRP8	1		0	1	0	0
LSR	3		1	0	1	1
LSS	5		1	1	1	2
MAPT	No Upstream Sequence
METTL7A	0		0	0	0	0
MPO	4		1	1	1	1
MSR1	0		0	0	0	0
MTTP	No Upstream Sequence
NR1H2	No Upstream Sequence
NSDHL	0		0	0	0	0
PCSK9	4		1	0	3	0
PCYOX1	0		0	0	0	0
PITPNM1	0		0	0	0	0
PLA2G2A	6		1	2	1	2
PLA2G7	0		0	0	0	0
PLAGL2	7		2	2	1	2
PLIN1	No Upstream Sequence
PLIN2	0		0	0	0	0
PLIN3	4		2	0	1	1
PLIN4	3		1	0	0	2
PLIN5	No Upstream Sequence
PLTP	1		1	0	0	0
PNPLA1	4		2	0	2	0
PNPLA2	0		0	0	0	0
PNPLA3	1		0	1	0	0
PNPLA4	1		0	0	1	0
PNPLA5	12		3	4	3	2
PON1	5		1	2	0	2
PPIA	12		2	5	1	4
PPID	1		0	1	0	0
PRPF19	0		0	0	0	0
PTGFRN	0		0	0	0	0
RAB18	1		0	0	1	0
RAB3GAP1	6		1	2	1	2
RAB5C	No Upstream Sequence
RAB7A	0		0	0	0	0
RAP1B	15		0	7	1	7
REPIN1	No Upstream Sequence
RSAD2	No Upstream Sequence
SAA1	0		0	0	0	0
SAA2	4		2	0	2	0
SAA4	No Upstream Sequence
SCARB1	6		1	2	1	2
SCARF1	0		0	0	0	0
SCCPDH	7		2	1	3	1
SIGMAR1	2		0	1	0	1
SOAT1	1		0	1	0	0
SOAT2	0		0	0	0	0
SORL1	No Upstream Sequence
SPAST	0		0	0	0	0
SPG20	5		2	0	2	1
STAB1	8		1	4	1	2
STAB2	3		1	1	1	0
STARD13	3		1	1	1	0
TBC1D20	9		0	5	0	4
THBS1	8		1	4	0	3
TRAF6	0		0	0	0	0
TRAP1	4		1	2	1	0
VCP	0		0	0	0	0
VIMP	1		0	1	0	0
VLDLR	No Upstream Sequence

## Sheet: Site Data
seq_id	ft_type	ft_name	strand	start	end	sequence	weight	Pval	ln_Pval	sig	rank	rank_pm
ABCA1	limit	START_END	D	0	-1	.	0	0	0	0
ABCA5	limit	START_END	D	-3000	-1	.	0	0	0	0
ABCA7	limit	START_END	D	-1032	-1	.	0	0	0	0
ABCG1	limit	START_END	D	-3000	-1	.	0	0	0	0
ABHD4	limit	START_END	D	0	-1	.	0	0	0	0
ABHD5	limit	START_END	D	0	-1	.	0	0	0	0
ACSL3	limit	START_END	D	-3000	-1	.	0	0	0	0
ACSL4	limit	START_END	D	-3000	-1	.	0	0	0	0
AGT	limit	START_END	D	0	-1	.	0	0	0	0
AGTR1	limit	START_END	D	-1579	-1	.	0	0	0	0
AIFM2	limit	START_END	D	-3000	-1	.	0	0	0	0
ALDH3B2	limit	START_END	D	-1571	-1	.	0	0	0	0
ALOX15	limit	START_END	D	-3000	-1	.	0	0	0	0
ANKRA2	limit	START_END	D	0	-1	.	0	0	0	0
ANXA2	limit	START_END	D	-1579	-1	.	0	0	0	0
APOA1	limit	START_END	D	0	-1	.	0	0	0	0
APOA2	limit	START_END	D	-2307	-1	.	0	0	0	0
APOA4	limit	START_END	D	-3000	-1	.	0	0	0	0
APOA5	limit	START_END	D	-3000	-1	.	0	0	0	0
APOB	limit	START_END	D	-3000	-1	.	0	0	0	0
APOBR	limit	START_END	D	0	-1	.	0	0	0	0
APOC1	limit	START_END	D	0	-1	.	0	0	0	0
APOC3	limit	START_END	D	-3000	-1	.	0	0	0	0
APOC4	limit	START_END	D	-3000	-1	.	0	0	0	0
APOC4-APOC2	limit	START_END	D	-3000	-1	.	0	0	0	0
APOE	limit	START_END	D	-2064	-1	.	0	0	0	0
APOF	limit	START_END	D	-3000	-1	.	0	0	0	0
APOH	limit	START_END	D	-3000	-1	.	0	0	0	0
APOL1	limit	START_END	D	-3000	-1	.	0	0	0	0
APOL2	limit	START_END	D	-3000	-1	.	0	0	0	0
APOL5	limit	START_END	D	-3000	-1	.	0	0	0	0
APOM	limit	START_END	D	0	-1	.	0	0	0	0
APOO	limit	START_END	D	0	-1	.	0	0	0	0
ARF1	limit	START_END	D	-3000	-1	.	0	0	0	0
ATG2A	limit	START_END	D	-304	-1	.	0	0	0	0
ATG2B	limit	START_END	D	0	-1	.	0	0	0	0
BCAP31	limit	START_END	D	-170	-1	.	0	0	0	0
BSCL2	limit	START_END	D	0	-1	.	0	0	0	0
CAV1	limit	START_END	D	-3000	-1	.	0	0	0	0
CD36	limit	START_END	D	0	-1	.	0	0	0	0
CDH13	limit	START_END	D	-3000	-1	.	0	0	0	0
CETP	limit	START_END	D	-3000	-1	.	0	0	0	0
CIDEA	limit	START_END	D	-3000	-1	.	0	0	0	0
CIDEB	limit	START_END	D	0	-1	.	0	0	0	0
CIDEC	limit	START_END	D	-3000	-1	.	0	0	0	0
CKAP4	limit	START_END	D	0	-1	.	0	0	0	0
CLU	limit	START_END	D	-3000	-1	.	0	0	0	0
COLEC12	limit	START_END	D	-3000	-1	.	0	0	0	0
CRP	limit	START_END	D	-3000	-1	.	0	0	0	0
CYB5R3	limit	START_END	D	-3000	-1	.	0	0	0	0
DDHD2	limit	START_END	D	-3000	-1	.	0	0	0	0
DFFA	limit	START_END	D	0	-1	.	0	0	0	0
DGAT1	limit	START_END	D	-3000	-1	.	0	0	0	0
DGAT2	limit	START_END	D	0	-1	.	0	0	0	0
EHD1	limit	START_END	D	-1263	-1	.	0	0	0	0
FAAH2	limit	START_END	D	-3000	-1	.	0	0	0	0
FABP4	limit	START_END	D	-3000	-1	.	0	0	0	0
FAF2	limit	START_END	D	-3000	-1	.	0	0	0	0
FITM1	limit	START_END	D	0	-1	.	0	0	0	0
FITM2	limit	START_END	D	-3000	-1	.	0	0	0	0
G0S2	limit	START_END	D	-3000	-1	.	0	0	0	0
GAPDH	limit	START_END	D	-428	-1	.	0	0	0	0
GBF1	limit	START_END	D	-3000	-1	.	0	0	0	0
GIMAP2	limit	START_END	D	-3000	-1	.	0	0	0	0
GIMAP7	limit	START_END	D	-990	-1	.	0	0	0	0
GPIHBP1	limit	START_END	D	-3000	-1	.	0	0	0	0
HDLBP	limit	START_END	D	0	-1	.	0	0	0	0
HILPDA	limit	START_END	D	-3000	-1	.	0	0	0	0
HPR	limit	START_END	D	-2168	-1	.	0	0	0	0
HSD17B11	limit	START_END	D	-3000	-1	.	0	0	0	0
HSD17B13	limit	START_END	D	0	-1	.	0	0	0	0
IRAK1	limit	START_END	D	0	-1	.	0	0	0	0
LCAT	limit	START_END	D	0	-1	.	0	0	0	0
LDAH	limit	START_END	D	-3000	-1	.	0	0	0	0
LDLR	limit	START_END	D	-3000	-1	.	0	0	0	0
LIPC	limit	START_END	D	0	-1	.	0	0	0	0
LIPE	limit	START_END	D	-861	-1	.	0	0	0	0
LIPG	limit	START_END	D	-3000	-1	.	0	0	0	0
LMLN	limit	START_END	D	-57	-1	.	0	0	0	0
LPA	limit	START_END	D	-1968	-1	.	0	0	0	0
LPCAT1	limit	START_END	D	-3000	-1	.	0	0	0	0
LPCAT2	limit	START_END	D	-2306	-1	.	0	0	0	0
LPL	limit	START_END	D	-3000	-1	.	0	0	0	0
LRP8	limit	START_END	D	-162	-1	.	0	0	0	0
LSR	limit	START_END	D	-3000	-1	.	0	0	0	0
LSS	limit	START_END	D	-392	-1	.	0	0	0	0
MAPT	limit	START_END	D	0	-1	.	0	0	0	0
METTL7A	limit	START_END	D	-3000	-1	.	0	0	0	0
MPO	limit	START_END	D	-3000	-1	.	0	0	0	0
MSR1	limit	START_END	D	-3000	-1	.	0	0	0	0
MTTP	limit	START_END	D	0	-1	.	0	0	0	0
NR1H2	limit	START_END	D	0	-1	.	0	0	0	0
NSDHL	limit	START_END	D	-189	-1	.	0	0	0	0
PCSK9	limit	START_END	D	-3000	-1	.	0	0	0	0
PCYOX1	limit	START_END	D	-3000	-1	.	0	0	0	0
PITPNM1	limit	START_END	D	-233	-1	.	0	0	0	0
PLA2G2A	limit	START_END	D	-3000	-1	.	0	0	0	0
PLA2G7	limit	START_END	D	-3000	-1	.	0	0	0	0
PLAGL2	limit	START_END	D	-88	-1	.	0	0	0	0
PLIN1	limit	START_END	D	0	-1	.	0	0	0	0
PLIN2	limit	START_END	D	-3000	-1	.	0	0	0	0
PLIN3	limit	START_END	D	-3000	-1	.	0	0	0	0
PLIN4	limit	START_END	D	-3000	-1	.	0	0	0	0
PLIN5	limit	START_END	D	0	-1	.	0	0	0	0
PLTP	limit	START_END	D	-3000	-1	.	0	0	0	0
PNPLA1	limit	START_END	D	-3000	-1	.	0	0	0	0
PNPLA2	limit	START_END	D	-3000	-1	.	0	0	0	0
PNPLA3	limit	START_END	D	-3000	-1	.	0	0	0	0
PNPLA4	limit	START_END	D	-3000	-1	.	0	0	0	0
PNPLA5	limit	START_END	D	-3000	-1	.	0	0	0	0
PON1	limit	START_END	D	-3000	-1	.	0	0	0	0
PPIA	limit	START_END	D	-3000	-1	.	0	0	0	0
PPID	limit	START_END	D	-3000	-1	.	0	0	0	0
PRPF19	limit	START_END	D	-200	-1	.	0	0	0	0
PTGFRN	limit	START_END	D	-525	-1	.	0	0	0	0
RAB18	limit	START_END	D	-3000	-1	.	0	0	0	0
RAB3GAP1	limit	START_END	D	-3000	-1	.	0	0	0	0
RAB5C	limit	START_END	D	0	-1	.	0	0	0	0
RAB7A	limit	START_END	D	-3000	-1	.	0	0	0	0
RAP1B	limit	START_END	D	-3000	-1	.	0	0	0	0
REPIN1	limit	START_END	D	0	-1	.	0	0	0	0
RSAD2	limit	START_END	D	0	-1	.	0	0	0	0
SAA1	limit	START_END	D	-3000	-1	.	0	0	0	0
SAA2	limit	START_END	D	-3000	-1	.	0	0	0	0
SAA4	limit	START_END	D	0	-1	.	0	0	0	0
SCARB1	limit	START_END	D	-3000	-1	.	0	0	0	0
SCARF1	limit	START_END	D	-397	-1	.	0	0	0	0
SCCPDH	limit	START_END	D	-3000	-1	.	0	0	0	0
SIGMAR1	limit	START_END	D	-323	-1	.	0	0	0	0
SOAT1	limit	START_END	D	-3000	-1	.	0	0	0	0
SOAT2	limit	START_END	D	-1172	-1	.	0	0	0	0
SORL1	limit	START_END	D	0	-1	.	0	0	0	0
SPAST	limit	START_END	D	-3000	-1	.	0	0	0	0
SPG20	limit	START_END	D	-3000	-1	.	0	0	0	0
STAB1	limit	START_END	D	-2266	-1	.	0	0	0	0
STAB2	limit	START_END	D	-3000	-1	.	0	0	0	0
STARD13	limit	START_END	D	-3000	-1	.	0	0	0	0
TBC1D20	limit	START_END	D	-3000	-1	.	0	0	0	0
THBS1	limit	START_END	D	-3000	-1	.	0	0	0	0
TRAF6	limit	START_END	D	-88	-1	.	0	0	0	0
TRAP1	limit	START_END	D	-3000	-1	.	0	0	0	0
VCP	limit	START_END	D	-585	-1	.	0	0	0	0
VIMP	limit	START_END	D	-3000	-1	.	0	0	0	0
VLDLR	limit	START_END	D	0	-1	.	0	0	0	0
ABCA7	site	TFAP2C_V1	D	-229	-215	CGTTCCCGGAGGGCG	8.8	2.9e-05	-10.438	4.533	1	1
ABCA7	site	TFAP2A_V2	R	-226	-215	CGCCCTCCGGGA	8	5.7e-05	-9.772	4.244	2	1
ABCA7	site	TFAP2A_V2	D	-226	-215	TCCCGGAGGGCG	7.7	7.8e-05	-9.456	4.107	3	2
ABCA7	site	TFAP2C_V2	D	-226	-215	TCCCGGAGGGCG	7.6	8.1e-05	-9.427	4.094	4	1
ABCA7	site	TFAP2C_V2	R	-226	-215	CGCCCTCCGGGA	7.6	8.1e-05	-9.427	4.094	5	2
ACSL3	site	TFAP2A_V2	D	-49	-38	CGCCCCGGGCCG	10.5	1.4e-06	-13.445	5.839	1	1
ACSL3	site	TFAP2C_V2	D	-49	-38	CGCCCCGGGCCG	9.6	6.1e-06	-12.011	5.216	2	1
ACSL3	site	TFAP2C_V2	R	-49	-38	CGGCCCGGGGCG	9.4	8e-06	-11.735	5.096	3	2
ACSL3	site	TFAP2A_V2	R	-49	-38	CGGCCCGGGGCG	9.2	1.3e-05	-11.23	4.877	4	2
ACSL3	site	TFAP2C_V1	D	-52	-38	CCCCGCCCCGGGCCG	9	2.3e-05	-10.696	4.645	5	1
ACSL3	site	TFAP2C_V1	D	-445	-431	TCTTGCCCCAGGCAG	8.4	4.5e-05	-10	4.343	6	2
ACSL3	site	TFAP2C_V1	R	-856	-842	GCCAGCCTCAGGCTA	8.3	5.1e-05	-9.893	4.297	7	3
ACSL3	site	TFAP2A_V1	R	-856	-842	GCCAGCCTCAGGCTA	8.1	5.4e-05	-9.835	4.271	8	1
ACSL3	site	TFAP2A_V1	D	-52	-38	CCCCGCCCCGGGCCG	7.7	7.8e-05	-9.462	4.109	9	2
AIFM2	site	TFAP2A_V1	D	-2306	-2292	CCAAGCCTCAGGGCT	9.1	1.9e-05	-10.894	4.731	1	1
AIFM2	site	TFAP2C_V1	D	-2306	-2292	CCAAGCCTCAGGGCT	8.6	3.7e-05	-10.204	4.431	2	1
AIFM2	site	TFAP2C_V2	D	-2303	-2292	AGCCTCAGGGCT	7.4	0.0001	-9.188	3.99	3	1
ALOX15	site	TFAP2A_V2	D	-480	-469	TGCCGTGAGCCG	7.4	0.0001	-9.169	3.982	1	1
APOA4	site	TFAP2A_V1	R	-2092	-2078	ACCAGCCTGAGGCCT	8.7	2.9e-05	-10.454	4.54	1	1
APOA4	site	TFAP2A_V2	R	-325	-314	TGCCTCGAGGCC	8.4	3.7e-05	-10.215	4.436	2	1
APOA4	site	TFAP2A_V1	D	-328	-314	CAGGGCCTCGAGGCA	8.4	3.9e-05	-10.145	4.406	3	2
APOA4	site	TFAP2C_V2	R	-325	-314	TGCCTCGAGGCC	8.1	4.8e-05	-9.954	4.323	4	1
APOA4	site	TFAP2C_V2	D	-325	-314	GGCCTCGAGGCA	8	5.3e-05	-9.844	4.275	5	2
APOA4	site	TFAP2A_V1	D	-1234	-1220	GATTGCTTGAGGCCA	7.9	6.4e-05	-9.655	4.193	6	3
APOA4	site	TFAP2A_V2	D	-325	-314	GGCCTCGAGGCA	7.5	9.5e-05	-9.26	4.021	7	2
APOB	site	TFAP2C_V1	R	-278	-264	CAGCGCCTCAGGGTC	8.8	2.9e-05	-10.438	4.533	1	1
APOB	site	TFAP2A_V1	R	-278	-264	CAGCGCCTCAGGGTC	8.4	3.9e-05	-10.145	4.406	2	1
APOC3	site	TFAP2A_V1	R	-493	-479	CAGAGCCCGAGGCCT	9.5	1.1e-05	-11.396	4.949	1	1
APOC3	site	TFAP2C_V1	R	-493	-479	CAGAGCCCGAGGCCT	8.2	5.6e-05	-9.783	4.249	2	1
APOC3	site	TFAP2A_V1	D	-126	-112	ATGGGCCCGAGGCCC	7.8	7.1e-05	-9.553	4.149	3	2
APOC3	site	TFAP2C_V1	D	-562	-548	TCCTCCCCCAGGGGA	7.7	9e-05	-9.314	4.045	4	2
APOC4	site	TFAP2A_V2	R	-1677	-1666	CACCCCAGGGCA	7.8	7e-05	-9.563	4.153	1	1
APOC4	site	TFAP2C_V2	R	-1677	-1666	CACCCCAGGGCA	7.7	7.5e-05	-9.499	4.126	2	1
APOC4-APOC2	site	TFAP2A_V2	R	-1677	-1666	CACCCCAGGGCA	7.8	7e-05	-9.563	4.153	1	1
APOC4-APOC2	site	TFAP2C_V2	R	-1677	-1666	CACCCCAGGGCA	7.7	7.5e-05	-9.499	4.126	2	1
APOE	site	TFAP2C_V1	R	-1829	-1815	CCTACCCTCAGGCAA	9.7	8.5e-06	-11.672	5.069	1	1
APOE	site	TFAP2A_V1	D	-1831	-1817	CCTTGCCTGAGGGTA	9.6	1e-05	-11.512	5	2	1
APOE	site	TFAP2A_V2	R	-1828	-1817	TACCCTCAGGCA	8.7	2.5e-05	-10.593	4.6	3	1
APOE	site	TFAP2C_V1	R	-83	-69	CCCTGCCCCAGGCAC	8.7	3.3e-05	-10.319	4.482	4	2
APOE	site	TFAP2C_V1	D	-1460	-1446	TCTGCCCCCAGGGTC	8.4	4.5e-05	-10	4.343	5	3
APOE	site	TFAP2A_V1	R	-1458	-1444	CAGACCCTGGGGGCA	8.2	4.9e-05	-9.932	4.313	6	2
APOE	site	TFAP2C_V1	R	-23	-9	CCCTCCCCCAGGGAT	8.3	5.1e-05	-9.893	4.297	7	4
APOE	site	TFAP2C_V1	D	-1831	-1817	CCTTGCCTGAGGGTA	8.2	5.6e-05	-9.783	4.249	8	5
APOE	site	TFAP2C_V2	R	-1828	-1817	TACCCTCAGGCA	7.9	6e-05	-9.719	4.221	9	1
APOE	site	TFAP2C_V1	R	-1895	-1881	AGCGACCCCAGGCCA	7.9	7.5e-05	-9.503	4.127	10	6
APOE	site	TFAP2A_V1	R	-1829	-1815	CCTACCCTCAGGCAA	7.7	7.8e-05	-9.462	4.109	11	3
APOE	site	TFAP2C_V2	D	-1828	-1817	TGCCTGAGGGTA	7.4	0.0001	-9.188	3.99	12	2
APOE	site	TFAP2A_V2	D	-380	-369	CGCCCCCAGCCC	7.4	0.0001	-9.169	3.982	13	2
APOL1	site	TFAP2A_V1	R	-1700	-1686	GTCTGCCTCAGGGTA	9.9	6.6e-06	-11.925	5.179	1	1
APOL1	site	TFAP2C_V1	R	-1700	-1686	GTCTGCCTCAGGGTA	9.1	2e-05	-10.807	4.694	2	1
APOL1	site	TFAP2A_V2	D	-1700	-1689	TACCCTGAGGCA	8.3	4e-05	-10.133	4.401	3	1
APOL1	site	TFAP2C_V1	R	-868	-854	CTTTGCCCCAGGCAG	8.4	4.5e-05	-10	4.343	4	2
APOL1	site	TFAP2C_V2	D	-1700	-1689	TACCCTGAGGCA	8.1	4.8e-05	-9.954	4.323	5	1
APOL1	site	TFAP2C_V1	R	-96	-82	CGCATCCTCAGGGCT	8.2	5.6e-05	-9.783	4.249	6	3
APOL1	site	TFAP2A_V1	R	-96	-82	CGCATCCTCAGGGCT	8	5.9e-05	-9.738	4.229	7	2
APOL1	site	TFAP2C_V2	R	-1700	-1689	TGCCTCAGGGTA	7.9	6e-05	-9.719	4.221	8	2
ARF1	site	TFAP2A_V2	R	-104	-93	TGCCCCGGGCCG	9.7	6.2e-06	-11.996	5.21	1	1
ARF1	site	TFAP2A_V2	D	-920	-909	TGCCCCCGGGCC	9.6	7.3e-06	-11.822	5.134	2	2
ARF1	site	TFAP2C_V2	D	-104	-93	CGGCCCGGGGCA	9.3	9.4e-06	-11.576	5.027	3	1
ARF1	site	TFAP2A_V1	R	-920	-906	CGAGGCCCGGGGGCA	9.4	1.3e-05	-11.268	4.894	4	1
ARF1	site	TFAP2C_V2	R	-104	-93	TGCCCCGGGCCG	9	1.4e-05	-11.146	4.841	5	2
ARF1	site	TFAP2A_V1	D	-314	-300	CAGTCCCCGAGGCCT	8.9	2.3e-05	-10.681	4.639	6	2
ARF1	site	TFAP2C_V2	D	-920	-909	TGCCCCCGGGCC	8.6	2.6e-05	-10.573	4.592	7	3
ARF1	site	TFAP2C_V1	R	-1063	-1049	CTCTCCCCCAGGGCT	8.8	2.9e-05	-10.438	4.533	8	1
ARF1	site	TFAP2A_V2	D	-104	-93	CGGCCCGGGGCA	8.6	2.9e-05	-10.435	4.532	9	3
ARF1	site	TFAP2C_V1	R	-104	-90	CCCTGCCCCGGGCCG	8.7	3.3e-05	-10.319	4.482	10	2
ARF1	site	TFAP2A_V1	R	-1063	-1049	CTCTCCCCCAGGGCT	8.5	3.5e-05	-10.247	4.45	11	3
ARF1	site	TFAP2C_V2	R	-920	-909	GGCCCGGGGGCA	8.2	4.3e-05	-10.057	4.368	12	4
ARF1	site	TFAP2A_V2	R	-1063	-1052	TCCCCCAGGGCT	7.8	7e-05	-9.563	4.153	13	4
ARF1	site	TFAP2A_V1	R	-104	-90	CCCTGCCCCGGGCCG	7.8	7.1e-05	-9.553	4.149	14	4
ARF1	site	TFAP2C_V1	D	-314	-300	CAGTCCCCGAGGCCT	7.9	7.5e-05	-9.503	4.127	15	3
ARF1	site	TFAP2C_V1	D	-922	-908	CCTGCCCCCGGGCCT	7.8	8.2e-05	-9.403	4.084	16	4
ARF1	site	TFAP2A_V1	D	-923	-909	CCCTGCCCCCGGGCC	7.5	9.3e-05	-9.285	4.032	17	5
ARF1	site	TFAP2A_V2	R	-920	-909	GGCCCGGGGGCA	7.5	9.5e-05	-9.26	4.021	18	5
ARF1	site	TFAP2A_V2	R	-347	-336	CGCCCCTCGCCG	7.5	9.5e-05	-9.26	4.021	19	6
ARF1	site	TFAP2C_V2	R	-1063	-1052	TCCCCCAGGGCT	7.4	0.0001	-9.188	3.99	20	5
ATG2A	site	TFAP2A_V2	D	-104	-93	CGCCCGAAGGCT	10	3.6e-06	-12.522	5.438	1	1
ATG2A	site	TFAP2C_V2	D	-104	-93	CGCCCGAAGGCT	9.8	4.1e-06	-12.416	5.392	2	1
ATG2A	site	TFAP2C_V2	R	-104	-93	AGCCTTCGGGCG	9.4	8e-06	-11.735	5.096	3	2
ATG2A	site	TFAP2A_V2	R	-104	-93	AGCCTTCGGGCG	9.4	9.7e-06	-11.541	5.012	4	2
ATG2A	site	TFAP2A_V1	D	-107	-93	TCGCGCCCGAAGGCT	8.7	2.9e-05	-10.454	4.54	5	1
ATG2A	site	TFAP2C_V2	R	-16	-5	CGCCTCCGGACG	7.4	0.0001	-9.188	3.99	6	3
BCAP31	site	TFAP2A_V2	D	-39	-28	CGCCCCTCGGCG	9.1	1.4e-05	-11.143	4.839	1	1
BCAP31	site	TFAP2C_V2	R	-39	-28	CGCCGAGGGGCG	8.1	4.8e-05	-9.954	4.323	2	1
BCAP31	site	TFAP2C_V2	D	-39	-28	CGCCCCTCGGCG	7.8	6.8e-05	-9.594	4.167	3	2
BCAP31	site	TFAP2A_V2	R	-39	-28	CGCCGAGGGGCG	7.6	8.6e-05	-9.367	4.068	4	2
CAV1	site	TFAP2A_V1	D	-1966	-1952	GATTGCTTGAGGCCA	7.9	6.4e-05	-9.655	4.193	1	1
CETP	site	TFAP2C_V2	D	-976	-965	TGCCCAGGGGCA	8.2	4.3e-05	-10.057	4.368	1	1
CETP	site	TFAP2A_V1	R	-976	-962	GATTGCCCCTGGGCA	8.3	4.4e-05	-10.04	4.36	2	1
CETP	site	TFAP2C_V2	R	-976	-965	TGCCCCTGGGCA	7.9	6e-05	-9.719	4.221	3	2
CETP	site	TFAP2A_V2	R	-976	-965	TGCCCCTGGGCA	7.7	7.8e-05	-9.456	4.107	4	1
CIDEA	site	TFAP2C_V1	D	-143	-129	CGCGGCTCCAGGCTG	9	2.3e-05	-10.696	4.645	1	1
CIDEA	site	TFAP2C_V1	R	-2544	-2530	CACACCCTCAGGGAG	8.5	4.1e-05	-10.107	4.389	2	2
CIDEA	site	TFAP2C_V2	D	-165	-154	CGGCCCAAGGCA	8	5.3e-05	-9.844	4.275	3	1
CIDEA	site	TFAP2C_V1	R	-410	-396	CCCAGCCCCAGGCTC	8.1	6.2e-05	-9.685	4.206	4	3
CIDEA	site	TFAP2A_V2	D	-165	-154	CGGCCCAAGGCA	7.4	0.0001	-9.169	3.982	5	1
CLU	site	TFAP2A_V1	R	-925	-911	GGCAGCCTCGGGGAA	7.8	7.1e-05	-9.553	4.149	1	1
COLEC12	site	TFAP2C_V2	D	-356	-345	ACCCCCGGGGCA	9	1.4e-05	-11.146	4.841	1	1
COLEC12	site	TFAP2A_V2	D	-356	-345	ACCCCCGGGGCA	9	1.6e-05	-11.032	4.791	2	1
COLEC12	site	TFAP2A_V2	R	-106	-95	CGCCCTCGGCCC	8.7	2.5e-05	-10.593	4.6	3	2
COLEC12	site	TFAP2A_V1	D	-359	-345	GCCACCCCCGGGGCA	8.6	3.2e-05	-10.345	4.493	4	1
COLEC12	site	TFAP2C_V2	R	-356	-345	TGCCCCGGGGGT	8.2	4.3e-05	-10.057	4.368	5	2
COLEC12	site	TFAP2C_V2	R	-2965	-2954	AACCCGGAGGCA	7.7	7.5e-05	-9.499	4.126	6	3
COLEC12	site	TFAP2A_V2	R	-356	-345	TGCCCCGGGGGT	7.6	8.6e-05	-9.367	4.068	7	3
COLEC12	site	TFAP2A_V2	R	-2965	-2954	AACCCGGAGGCA	7.5	9.5e-05	-9.26	4.021	8	4
CYB5R3	site	TFAP2C_V2	D	-217	-206	CGGCCCGAGGCA	9.1	1.3e-05	-11.251	4.886	1	1
CYB5R3	site	TFAP2A_V2	R	-217	-206	TGCCTCGGGCCG	8.8	2.2e-05	-10.716	4.654	2	1
CYB5R3	site	TFAP2A_V2	D	-217	-206	CGGCCCGAGGCA	8.7	2.5e-05	-10.593	4.6	3	2
CYB5R3	site	TFAP2C_V2	R	-217	-206	TGCCTCGGGCCG	8.5	2.9e-05	-10.45	4.538	4	2
CYB5R3	site	TFAP2C_V2	D	-271	-260	CGCCGCCGGCGA	8.4	3.2e-05	-10.34	4.49	5	3
CYB5R3	site	TFAP2C_V1	D	-219	-205	CCCGGCCCGAGGCAG	8.7	3.3e-05	-10.319	4.482	6	1
CYB5R3	site	TFAP2A_V2	D	-271	-260	CGCCGCCGGCGA	8.4	3.7e-05	-10.215	4.436	7	3
CYB5R3	site	TFAP2A_V2	R	-271	-260	TCGCCGGCGGCG	8.4	3.7e-05	-10.215	4.436	8	4
CYB5R3	site	TFAP2A_V1	R	-392	-378	CGCTCCCGGAGGGCA	8.4	3.9e-05	-10.145	4.406	9	1
CYB5R3	site	TFAP2A_V1	R	-217	-203	AGCTGCCTCGGGCCG	8.3	4.4e-05	-10.04	4.36	10	2
CYB5R3	site	TFAP2A_V2	R	-257	-246	CGCCCGGAGCCT	8.2	4.5e-05	-9.999	4.343	11	5
CYB5R3	site	TFAP2C_V1	R	-217	-203	AGCTGCCTCGGGCCG	8.2	5.6e-05	-9.783	4.249	12	2
CYB5R3	site	TFAP2C_V1	R	-392	-378	CGCTCCCGGAGGGCA	8	6.8e-05	-9.589	4.165	13	3
CYB5R3	site	TFAP2C_V2	R	-271	-260	TCGCCGGCGGCG	7.7	7.5e-05	-9.499	4.126	14	4
CYB5R3	site	TFAP2C_V1	R	-914	-900	TCCGCCTCCAGGGTT	7.8	8.2e-05	-9.403	4.084	15	4
CYB5R3	site	TFAP2C_V1	R	-734	-720	TCCGCCTCCAGGGTT	7.8	8.2e-05	-9.403	4.084	16	5
CYB5R3	site	TFAP2C_V2	R	-392	-381	TCCCGGAGGGCA	7.5	9.2e-05	-9.293	4.036	17	5
CYB5R3	site	TFAP2C_V2	R	-257	-246	CGCCCGGAGCCT	7.5	9.2e-05	-9.293	4.036	18	6
DGAT1	site	TFAP2C_V2	D	-52	-41	CGCCCGCGGCGA	10.2	2.3e-06	-12.996	5.644	1	1
DGAT1	site	TFAP2A_V2	D	-52	-41	CGCCCGCGGCGA	10.2	2.7e-06	-12.819	5.567	2	1
DGAT1	site	TFAP2A_V2	R	-52	-41	TCGCCGCGGGCG	10.2	2.7e-06	-12.819	5.567	3	2
DGAT1	site	TFAP2C_V2	R	-52	-41	TCGCCGCGGGCG	9.8	4.1e-06	-12.416	5.392	4	2
DGAT1	site	TFAP2A_V2	D	-521	-510	CCCCCTAAGGCG	8.9	1.9e-05	-10.885	4.727	5	3
DGAT1	site	TFAP2A_V1	D	-55	-41	GCGCGCCCGCGGCGA	8.8	2.6e-05	-10.557	4.585	6	1
DGAT1	site	TFAP2A_V2	R	-94	-83	TCGCCGCGGCCG	8.6	2.9e-05	-10.435	4.532	7	4
DGAT1	site	TFAP2A_V1	D	-2411	-2397	ATCAGCCTGAGGCCC	8.4	3.9e-05	-10.145	4.406	8	2
DGAT1	site	TFAP2C_V2	D	-521	-510	CCCCCTAAGGCG	7.9	6e-05	-9.719	4.221	9	3
DGAT1	site	TFAP2C_V2	D	-94	-83	CGGCCGCGGCGA	7.9	6e-05	-9.719	4.221	10	4
DGAT1	site	TFAP2C_V2	R	-94	-83	TCGCCGCGGCCG	7.8	6.8e-05	-9.594	4.167	11	5
DGAT1	site	TFAP2C_V1	R	-2580	-2566	CCAGGCCTCAGGGAG	7.7	9e-05	-9.314	4.045	12	1
DGAT1	site	TFAP2C_V2	R	-2352	-2341	AGCCCGAAGCGA	7.5	9.2e-05	-9.293	4.036	13	6
DGAT1	site	TFAP2C_V1	R	-53	-39	AGTCGCCGCGGGCGC	7.6	9.8e-05	-9.235	4.011	14	2
EHD1	site	TFAP2C_V1	R	-630	-616	AGGACCCCCAGGGCA	8.5	4.1e-05	-10.107	4.389	1	1
EHD1	site	TFAP2A_V1	R	-630	-616	AGGACCCCCAGGGCA	8.3	4.4e-05	-10.04	4.36	2	1
EHD1	site	TFAP2C_V2	R	-630	-619	ACCCCCAGGGCA	8.1	4.8e-05	-9.954	4.323	3	1
EHD1	site	TFAP2A_V2	R	-630	-619	ACCCCCAGGGCA	8	5.7e-05	-9.772	4.244	4	1
EHD1	site	TFAP2A_V1	D	-818	-804	GACTCCTTGAGGGCA	7.5	9.3e-05	-9.285	4.032	5	2
FITM2	site	TFAP2C_V1	R	-2804	-2790	ATCACCCCGAGGGAC	7.6	9.8e-05	-9.235	4.011	1	1
GAPDH	site	TFAP2C_V1	D	-358	-344	CTTCGCCCCAGGCTG	8.5	4.1e-05	-10.107	4.389	1	1
GBF1	site	TFAP2C_V1	R	-790	-776	CTCACCCCCAGGCCA	9.5	1.1e-05	-11.377	4.941	1	1
GBF1	site	TFAP2A_V1	R	-790	-776	CTCACCCCCAGGCCA	8.5	3.5e-05	-10.247	4.45	2	1
GBF1	site	TFAP2C_V1	R	-710	-696	AACAGCCCCAGGGTG	8.3	5.1e-05	-9.893	4.297	3	2
GBF1	site	TFAP2C_V1	D	-983	-969	CCAACCCTCAGGCCC	7.9	7.5e-05	-9.503	4.127	4	3
GIMAP7	site	TFAP2A_V2	R	-840	-829	CGCCCCACGCCA	9	1.6e-05	-11.032	4.791	1	1
GIMAP7	site	TFAP2C_V2	R	-840	-829	CGCCCCACGCCA	8	5.3e-05	-9.844	4.275	2	1
GPIHBP1	site	TFAP2A_V1	R	-728	-714	CGCTCCCTGAGGCCA	9.9	6.6e-06	-11.925	5.179	1	1
GPIHBP1	site	TFAP2C_V1	R	-2439	-2425	CAAGCCCCCAGGGCA	9.4	1.3e-05	-11.238	4.881	2	1
GPIHBP1	site	TFAP2A_V2	R	-1480	-1469	CGCCCTCGGCCC	8.7	2.5e-05	-10.593	4.6	3	1
GPIHBP1	site	TFAP2C_V1	D	-1160	-1146	CCCAGCCTCAGGCGC	8.8	2.9e-05	-10.438	4.533	4	2
GPIHBP1	site	TFAP2A_V1	R	-2439	-2425	CAAGCCCCCAGGGCA	8.5	3.5e-05	-10.247	4.45	5	2
GPIHBP1	site	TFAP2A_V1	D	-447	-433	CTTAGCTTGAGGGCA	8.5	3.5e-05	-10.247	4.45	6	3
GPIHBP1	site	TFAP2C_V1	R	-728	-714	CGCTCCCTGAGGCCA	8.4	4.5e-05	-10	4.343	7	3
GPIHBP1	site	TFAP2A_V1	D	-1160	-1146	CCCAGCCTCAGGCGC	8	5.9e-05	-9.738	4.229	8	4
GPIHBP1	site	TFAP2A_V2	R	-2647	-2636	CACCCCAGGGCA	7.8	7e-05	-9.563	4.153	9	2
GPIHBP1	site	TFAP2C_V2	R	-2647	-2636	CACCCCAGGGCA	7.7	7.5e-05	-9.499	4.126	10	1
GPIHBP1	site	TFAP2C_V1	D	-730	-716	GGTGGCCTCAGGGAG	7.8	8.2e-05	-9.403	4.084	11	4
GPIHBP1	site	TFAP2C_V1	R	-2519	-2505	TGGTCCCCCAGGGCC	7.7	9e-05	-9.314	4.045	12	5
GPIHBP1	site	TFAP2C_V1	R	-2498	-2484	AAGACCTTCAGGGCA	7.7	9e-05	-9.314	4.045	13	6
GPIHBP1	site	TFAP2C_V2	D	-2591	-2580	AGCCCAGGGGCG	7.5	9.2e-05	-9.293	4.036	14	2
GPIHBP1	site	TFAP2A_V2	R	-2519	-2508	TCCCCCAGGGCC	7.5	9.5e-05	-9.26	4.021	15	3
GPIHBP1	site	TFAP2C_V1	R	-82	-68	CCCAGCTCCAGGCGC	7.6	9.8e-05	-9.235	4.011	16	7
GPIHBP1	site	TFAP2C_V2	D	-2708	-2697	GGCCCCAAGGCA	7.4	0.0001	-9.188	3.99	17	3
GPIHBP1	site	TFAP2A_V2	R	-2591	-2580	CGCCCCTGGGCT	7.4	0.0001	-9.169	3.982	18	4
HILPDA	site	TFAP2A_V2	R	-108	-97	ACCCCGCGGGCA	10.1	3.1e-06	-12.668	5.502	1	1
HILPDA	site	TFAP2C_V2	R	-108	-97	ACCCCGCGGGCA	9.9	3.6e-06	-12.536	5.445	2	1
HILPDA	site	TFAP2C_V2	D	-108	-97	TGCCCGCGGGGT	9	1.4e-05	-11.146	4.841	3	2
HILPDA	site	TFAP2A_V2	D	-108	-97	TGCCCGCGGGGT	8.7	2.5e-05	-10.593	4.6	4	2
HILPDA	site	TFAP2A_V1	R	-108	-94	CCCACCCCGCGGGCA	8.7	2.9e-05	-10.454	4.54	5	1
HILPDA	site	TFAP2A_V1	D	-111	-97	CGTTGCCCGCGGGGT	8.6	3.2e-05	-10.345	4.493	6	2
HSD17B11	site	TFAP2C_V2	D	-157	-146	CGCCCAGCGGCA	8.1	4.8e-05	-9.954	4.323	1	1
HSD17B11	site	TFAP2A_V2	D	-157	-146	CGCCCAGCGGCA	8	5.7e-05	-9.772	4.244	2	1
LDAH	site	TFAP2C_V2	R	-987	-976	TGCCCTAAGGCA	9.9	3.6e-06	-12.536	5.445	1	1
LDAH	site	TFAP2C_V2	D	-987	-976	TGCCTTAGGGCA	9.6	6.1e-06	-12.011	5.216	2	2
LDAH	site	TFAP2A_V2	R	-987	-976	TGCCCTAAGGCA	9.7	6.2e-06	-11.996	5.21	3	1
LDAH	site	TFAP2A_V2	D	-987	-976	TGCCTTAGGGCA	8.8	2.2e-05	-10.716	4.654	4	2
LDAH	site	TFAP2A_V2	D	-44	-33	CGCCGCGCGCCA	8.7	2.5e-05	-10.593	4.6	5	3
LDAH	site	TFAP2A_V1	D	-990	-976	CCATGCCTTAGGGCA	8.8	2.6e-05	-10.557	4.585	6	1
LDAH	site	TFAP2C_V2	D	-44	-33	CGCCGCGCGCCA	8	5.3e-05	-9.844	4.275	7	3
LIPE	site	TFAP2A_V2	R	-525	-514	CGCCCCCGGGCC	10.3	2.3e-06	-13.002	5.647	1	1
LIPE	site	TFAP2C_V2	R	-525	-514	CGCCCCCGGGCC	9.3	9.4e-06	-11.576	5.027	2	1
LIPE	site	TFAP2C_V1	R	-526	-512	CCCGCCCCCGGGCCT	8.6	3.7e-05	-10.204	4.431	3	1
LIPE	site	TFAP2C_V2	D	-525	-514	GGCCCGGGGGCG	8.3	3.7e-05	-10.197	4.429	4	2
LIPE	site	TFAP2A_V2	D	-525	-514	GGCCCGGGGGCG	8.2	4.5e-05	-9.999	4.343	5	2
LIPE	site	TFAP2A_V1	R	-526	-512	CCCGCCCCCGGGCCT	7.7	7.8e-05	-9.462	4.109	6	1
LIPG	site	TFAP2A_V1	D	-2587	-2573	CCTAGCCTCAAGCCA	8.4	3.9e-05	-10.145	4.406	1	1
LIPG	site	TFAP2C_V1	D	-1332	-1318	AACTCCTCCAGGCGA	8.2	5.6e-05	-9.783	4.249	2	1
LMLN	site	TFAP2A_V2	R	-24	-13	CGCCCCTCGCCG	7.5	9.5e-05	-9.26	4.021	1	1
LPCAT1	site	TFAP2C_V1	D	-2867	-2853	CCGGGCCCCAGGCCT	9.9	6e-06	-12.019	5.22	1	1
LPCAT1	site	TFAP2A_V2	R	-76	-65	CGCCGGCCGGCA	8.5	3.3e-05	-10.332	4.487	2	1
LPCAT1	site	TFAP2A_V1	D	-2867	-2853	CCGGGCCCCAGGCCT	8.5	3.5e-05	-10.247	4.45	3	1
LPCAT1	site	TFAP2A_V1	D	-613	-599	CGGGGCCTGAGGCCT	8.5	3.5e-05	-10.247	4.45	4	2
LPCAT1	site	TFAP2A_V2	R	-69	-58	CGCCTCCCGCCG	8.4	3.7e-05	-10.215	4.436	5	2
LPCAT1	site	TFAP2A_V2	D	-76	-65	TGCCGGCCGGCG	8.3	4e-05	-10.133	4.401	6	3
LPCAT1	site	TFAP2A_V2	D	-823	-812	CACCCGGAGGCA	8.2	4.5e-05	-9.999	4.343	7	4
LPCAT1	site	TFAP2A_V2	D	-284	-273	TCCCCGCGAGCA	8.2	4.5e-05	-9.999	4.343	8	5
LPCAT1	site	TFAP2A_V2	R	-73	-62	TCCCGCCGGCCG	8.2	4.5e-05	-9.999	4.343	9	6
LPCAT1	site	TFAP2C_V1	R	-611	-597	TCAGGCCTCAGGCCC	8.3	5.1e-05	-9.893	4.297	10	2
LPCAT1	site	TFAP2C_V2	D	-823	-812	CACCCGGAGGCA	7.9	6e-05	-9.719	4.221	11	1
LPCAT1	site	TFAP2C_V2	R	-76	-65	CGCCGGCCGGCA	7.9	6e-05	-9.719	4.221	12	2
LPCAT1	site	TFAP2C_V1	D	-1993	-1979	ACCTGCTCCAGGCCT	7.9	7.5e-05	-9.503	4.127	13	3
LPCAT1	site	TFAP2C_V2	D	-76	-65	TGCCGGCCGGCG	7.4	0.0001	-9.188	3.99	14	3
LPCAT2	site	TFAP2A_V2	R	-19	-8	CCCCCTCAGGCA	8.2	4.5e-05	-9.999	4.343	1	1
LPCAT2	site	TFAP2C_V1	R	-20	-6	CACCCCCTCAGGCAT	7.6	9.8e-05	-9.235	4.011	2	1
LRP8	site	TFAP2A_V2	D	-27	-16	CGCCGCCGAGCG	8.5	3.3e-05	-10.332	4.487	1	1
LSR	site	TFAP2C_V1	R	-211	-197	TTCGGCCCCTGGGCA	8.2	5.6e-05	-9.783	4.249	1	1
LSR	site	TFAP2A_V1	R	-211	-197	TTCGGCCCCTGGGCA	7.9	6.4e-05	-9.655	4.193	2	1
LSR	site	TFAP2C_V2	R	-334	-323	CGACCGAGGGCG	7.6	8.1e-05	-9.427	4.094	3	1
LSS	site	TFAP2A_V2	D	-181	-170	CGCCCCACGCCG	9.6	7.3e-06	-11.822	5.134	1	1
LSS	site	TFAP2C_V1	D	-196	-182	CGCTCCCTCAGGCCC	9.6	1e-05	-11.515	5.001	2	1
LSS	site	TFAP2A_V1	D	-196	-182	CGCTCCCTCAGGCCC	8.9	2.3e-05	-10.681	4.639	3	1
LSS	site	TFAP2C_V2	D	-181	-170	CGCCCCACGCCG	8.1	4.8e-05	-9.954	4.323	4	1
LSS	site	TFAP2C_V2	R	-181	-170	CGGCGTGGGGCG	7.4	0.0001	-9.188	3.99	5	2
MPO	site	TFAP2C_V1	R	-727	-713	AGTGCCCCCAGGGAA	9.1	2e-05	-10.807	4.694	1	1
MPO	site	TFAP2A_V1	D	-729	-715	TCTTCCCTGGGGGCA	8.1	5.4e-05	-9.835	4.271	2	1
MPO	site	TFAP2C_V2	R	-726	-715	TGCCCCCAGGGA	7.5	9.2e-05	-9.293	4.036	3	1
MPO	site	TFAP2A_V2	R	-726	-715	TGCCCCCAGGGA	7.4	0.0001	-9.169	3.982	4	1
PCSK9	site	TFAP2C_V1	D	-44	-30	GCGCGCCCCAGGCGT	9.3	1.5e-05	-11.092	4.817	1	1
PCSK9	site	TFAP2A_V1	D	-44	-30	GCGCGCCCCAGGCGT	8.5	3.5e-05	-10.247	4.45	2	1
PCSK9	site	TFAP2C_V1	R	-1710	-1696	TCCTCCTTCAGGGCA	8	6.8e-05	-9.589	4.165	3	2
PCSK9	site	TFAP2C_V1	D	-1168	-1154	TCTTGCTCCAGGGGA	7.6	9.8e-05	-9.235	4.011	4	3
PLA2G2A	site	TFAP2C_V2	D	-12	-1	AGCCCGAAGGCT	8.4	3.2e-05	-10.34	4.49	1	1
PLA2G2A	site	TFAP2A_V2	D	-12	-1	AGCCCGAAGGCT	8.1	5.1e-05	-9.881	4.291	2	1
PLA2G2A	site	TFAP2C_V2	R	-12	-1	AGCCTTCGGGCT	8	5.3e-05	-9.844	4.275	3	2
PLA2G2A	site	TFAP2C_V1	D	-1862	-1848	TGCAGCCTCAGGCAT	8.1	6.2e-05	-9.685	4.206	4	1
PLA2G2A	site	TFAP2A_V2	R	-12	-1	AGCCTTCGGGCT	7.7	7.8e-05	-9.456	4.107	5	2
PLA2G2A	site	TFAP2A_V1	D	-15	-1	GTCAGCCCGAAGGCT	7.6	8.4e-05	-9.382	4.075	6	1
PLAGL2	site	TFAP2A_V2	R	-31	-20	CGCCCGCGGGCT	11.5	1.8e-07	-15.511	6.736	1	1
PLAGL2	site	TFAP2C_V2	R	-31	-20	CGCCCGCGGGCT	11.1	2.2e-07	-15.324	6.655	2	1
PLAGL2	site	TFAP2A_V2	D	-31	-20	AGCCCGCGGGCG	11.3	2.7e-07	-15.14	6.575	3	2
PLAGL2	site	TFAP2C_V2	D	-31	-20	AGCCCGCGGGCG	11	3.2e-07	-14.944	6.49	4	2
PLAGL2	site	TFAP2A_V1	D	-34	-20	TCTAGCCCGCGGGCG	8.6	3.2e-05	-10.345	4.493	5	1
PLAGL2	site	TFAP2A_V1	R	-31	-17	GCCCGCCCGCGGGCT	8.3	4.4e-05	-10.04	4.36	6	2
PLAGL2	site	TFAP2C_V1	R	-32	-18	CCCGCCCGCGGGCTA	8.2	5.6e-05	-9.783	4.249	7	1
PLIN3	site	TFAP2A_V1	D	-2463	-2449	TCCTGCCTCAGGGCC	9.6	1e-05	-11.512	5	1	1
PLIN3	site	TFAP2C_V1	D	-2463	-2449	TCCTGCCTCAGGGCC	9.1	2e-05	-10.807	4.694	2	1
PLIN3	site	TFAP2A_V1	R	-721	-707	TCCAGCCTCCGGCCT	7.4	0.0001	-9.204	3.997	3	2
PLIN3	site	TFAP2C_V2	D	-2460	-2449	TGCCTCAGGGCC	7.4	0.0001	-9.188	3.99	4	1
PLIN4	site	TFAP2C_V2	D	-487	-476	GGCCCTAAGGCA	7.7	7.5e-05	-9.499	4.126	1	1
PLIN4	site	TFAP2A_V1	R	-487	-473	TCCTGCCTTAGGGCC	7.7	7.8e-05	-9.462	4.109	2	1
PLIN4	site	TFAP2C_V2	R	-487	-476	TGCCTTAGGGCC	7.5	9.2e-05	-9.293	4.036	3	2
PLTP	site	TFAP2A_V1	D	-1840	-1826	GATTGCCTGAGGTCA	8.2	4.9e-05	-9.932	4.313	1	1
PNPLA1	site	TFAP2C_V1	D	-1810	-1796	TCCGGCCTCAGGCTC	9.4	1.3e-05	-11.238	4.881	1	1
PNPLA1	site	TFAP2C_V1	D	-1053	-1039	GAGTGCCCCAGGGTC	7.7	9e-05	-9.314	4.045	2	2
PNPLA1	site	TFAP2A_V1	D	-1810	-1796	TCCGGCCTCAGGCTC	7.5	9.3e-05	-9.285	4.032	3	1
PNPLA1	site	TFAP2A_V1	D	-1053	-1039	GAGTGCCCCAGGGTC	7.5	9.3e-05	-9.285	4.032	4	2
PNPLA3	site	TFAP2A_V2	R	-727	-716	TCCCCCCAGGCT	7.8	7e-05	-9.563	4.153	1	1
PNPLA4	site	TFAP2C_V1	R	-2583	-2569	CTCTGCTCCAGGGAA	8.2	5.6e-05	-9.783	4.249	1	1
PNPLA5	site	TFAP2A_V2	R	-26	-15	CGCCCCCGGGCT	10.7	1.1e-06	-13.763	5.977	1	1
PNPLA5	site	TFAP2C_V2	R	-26	-15	CGCCCCCGGGCT	10.1	2.7e-06	-12.83	5.572	2	1
PNPLA5	site	TFAP2C_V2	D	-26	-15	AGCCCGGGGGCG	9.7	4.9e-06	-12.222	5.308	3	2
PNPLA5	site	TFAP2A_V2	D	-26	-15	AGCCCGGGGGCG	9.5	8.5e-06	-11.674	5.07	4	2
PNPLA5	site	TFAP2A_V1	D	-29	-15	CGCAGCCCGGGGGCG	9	2.1e-05	-10.795	4.688	5	1
PNPLA5	site	TFAP2A_V1	R	-26	-12	CGCCGCCCCCGGGCT	8.9	2.3e-05	-10.681	4.639	6	2
PNPLA5	site	TFAP2C_V1	D	-2580	-2566	ACTGGCCTCAGGGTG	8.8	2.9e-05	-10.438	4.533	7	1
PNPLA5	site	TFAP2C_V1	D	-2002	-1988	CCTGGCTCCAGGCCT	8.6	3.7e-05	-10.204	4.431	8	2
PNPLA5	site	TFAP2A_V1	R	-2578	-2564	GCCACCCTGAGGCCA	8.2	4.9e-05	-9.932	4.313	9	3
PNPLA5	site	TFAP2A_V2	R	-148	-137	CGCCCCCACGCG	8	5.7e-05	-9.772	4.244	10	3
PNPLA5	site	TFAP2C_V1	D	-29	-15	CGCAGCCCGGGGGCG	7.8	8.2e-05	-9.403	4.084	11	3
PNPLA5	site	TFAP2A_V2	R	-120	-109	TGCCCGCGCGCT	7.4	0.0001	-9.169	3.982	12	4
PON1	site	TFAP2C_V2	D	-2230	-2219	TGCCTCAAGGCA	9.1	1.3e-05	-11.251	4.886	1	1
PON1	site	TFAP2A_V1	D	-2233	-2219	ATATGCCTCAAGGCA	8.9	2.3e-05	-10.681	4.639	2	1
PON1	site	TFAP2C_V2	R	-2230	-2219	TGCCTTGAGGCA	8.6	2.6e-05	-10.573	4.592	3	2
PON1	site	TFAP2A_V2	D	-2230	-2219	TGCCTCAAGGCA	8.6	2.9e-05	-10.435	4.532	4	1
PON1	site	TFAP2A_V2	R	-2230	-2219	TGCCTTGAGGCA	8.2	4.5e-05	-9.999	4.343	5	2
PPIA	site	TFAP2A_V2	D	-860	-849	AGCCCCGAGGCG	10.3	2.3e-06	-13.002	5.647	1	1
PPIA	site	TFAP2C_V2	D	-860	-849	AGCCCCGAGGCG	10	3.2e-06	-12.643	5.491	2	1
PPIA	site	TFAP2A_V2	D	-206	-195	AGCCCGCAGGCG	9.9	4.4e-06	-12.34	5.359	3	2
PPIA	site	TFAP2C_V2	R	-860	-849	CGCCTCGGGGCT	9.7	4.9e-06	-12.222	5.308	4	2
PPIA	site	TFAP2A_V1	R	-860	-846	CCCCGCCTCGGGGCT	9.9	6.6e-06	-11.925	5.179	5	1
PPIA	site	TFAP2C_V2	D	-206	-195	AGCCCGCAGGCG	9.4	8e-06	-11.735	5.096	6	3
PPIA	site	TFAP2A_V2	R	-860	-849	CGCCTCGGGGCT	9.5	8.5e-06	-11.674	5.07	7	3
PPIA	site	TFAP2C_V2	R	-206	-195	CGCCTGCGGGCT	9.1	1.3e-05	-11.251	4.886	8	4
PPIA	site	TFAP2A_V2	R	-206	-195	CGCCTGCGGGCT	9.2	1.3e-05	-11.23	4.877	9	4
PPIA	site	TFAP2C_V1	R	-860	-846	CCCCGCCTCGGGGCT	8.3	5.1e-05	-9.893	4.297	10	1
PPIA	site	TFAP2A_V1	R	-206	-192	TCCCGCCTGCGGGCT	8	5.9e-05	-9.738	4.229	11	2
PPIA	site	TFAP2A_V2	D	-188	-177	TGCCTCCGCGCG	7.5	9.5e-05	-9.26	4.021	12	5
PPID	site	TFAP2A_V2	R	-120	-109	TGCCCTCCGCCA	7.8	7e-05	-9.563	4.153	1	1
RAB18	site	TFAP2C_V1	D	-1319	-1305	CGGGACCCCAGGGCA	7.7	9e-05	-9.314	4.045	1	1
RAB3GAP1	site	TFAP2C_V2	R	-2535	-2524	AGCCCTAGGGCA	9.5	7.3e-06	-11.833	5.139	1	1
RAB3GAP1	site	TFAP2A_V1	R	-2535	-2521	CACAGCCCTAGGGCA	9.4	1.3e-05	-11.268	4.894	2	1
RAB3GAP1	site	TFAP2C_V2	D	-2535	-2524	TGCCCTAGGGCT	9	1.4e-05	-11.146	4.841	3	2
RAB3GAP1	site	TFAP2A_V2	D	-2535	-2524	TGCCCTAGGGCT	8.8	2.2e-05	-10.716	4.654	4	1
RAB3GAP1	site	TFAP2A_V2	R	-2535	-2524	AGCCCTAGGGCA	8.7	2.5e-05	-10.593	4.6	5	2
RAB3GAP1	site	TFAP2C_V1	R	-2535	-2521	CACAGCCCTAGGGCA	8.4	4.5e-05	-10	4.343	6	1
RAP1B	site	TFAP2A_V2	R	-72	-61	CGCCGCGCGCCG	9.4	9.7e-06	-11.541	5.012	1	1
RAP1B	site	TFAP2C_V2	D	-156	-145	CGCCCAGAGGCA	8.7	2.3e-05	-10.702	4.648	2	1
RAP1B	site	TFAP2C_V1	R	-205	-191	CGCGCCTTCAGGCTC	8.7	3.3e-05	-10.319	4.482	3	1
RAP1B	site	TFAP2A_V2	R	-204	-193	CGCCTTCAGGCT	8.3	4e-05	-10.133	4.401	4	2
RAP1B	site	TFAP2A_V2	D	-156	-145	CGCCCAGAGGCA	8.2	4.5e-05	-9.999	4.343	5	3
RAP1B	site	TFAP2C_V2	R	-72	-61	CGCCGCGCGCCG	8.1	4.8e-05	-9.954	4.323	6	2
RAP1B	site	TFAP2A_V2	D	-72	-61	CGGCGCGCGGCG	8.1	5.1e-05	-9.881	4.291	7	4
RAP1B	site	TFAP2C_V2	D	-204	-193	AGCCTGAAGGCG	7.9	6e-05	-9.719	4.221	8	3
RAP1B	site	TFAP2C_V2	R	-204	-193	CGCCTTCAGGCT	7.8	6.8e-05	-9.594	4.167	9	4
RAP1B	site	TFAP2C_V2	D	-72	-61	CGGCGCGCGGCG	7.8	6.8e-05	-9.594	4.167	10	5
RAP1B	site	TFAP2A_V2	R	-137	-126	TGCCCACGGGCC	7.8	7e-05	-9.563	4.153	11	5
RAP1B	site	TFAP2C_V2	R	-137	-126	TGCCCACGGGCC	7.6	8.1e-05	-9.427	4.094	12	6
RAP1B	site	TFAP2C_V2	R	-156	-145	TGCCTCTGGGCG	7.5	9.2e-05	-9.293	4.036	13	7
RAP1B	site	TFAP2A_V2	R	-156	-145	TGCCTCTGGGCG	7.5	9.5e-05	-9.26	4.021	14	6
RAP1B	site	TFAP2A_V2	D	-204	-193	AGCCTGAAGGCG	7.4	0.0001	-9.169	3.982	15	7
SAA2	site	TFAP2A_V1	R	-977	-963	CATACCCTGAGGGCT	10.1	5.1e-06	-12.189	5.294	1	1
SAA2	site	TFAP2C_V1	D	-979	-965	CTAGCCCTCAGGGTA	8.9	2.6e-05	-10.572	4.591	2	1
SAA2	site	TFAP2C_V1	R	-977	-963	CATACCCTGAGGGCT	8.3	5.1e-05	-9.893	4.297	3	2
SAA2	site	TFAP2A_V1	D	-979	-965	CTAGCCCTCAGGGTA	7.7	7.8e-05	-9.462	4.109	4	2
SCARB1	site	TFAP2C_V1	R	-2738	-2724	CCCACCCCCAGGCAC	8.2	5.6e-05	-9.783	4.249	1	1
SCARB1	site	TFAP2A_V2	R	-2737	-2726	CACCCCCAGGCA	7.8	7e-05	-9.563	4.153	2	1
SCARB1	site	TFAP2A_V1	D	-1618	-1604	GAATCCCTCAGGCCC	7.5	9.3e-05	-9.285	4.032	3	1
SCARB1	site	TFAP2C_V2	D	-1030	-1019	TGCCTCAAGGGA	7.4	0.0001	-9.188	3.99	4	1
SCARB1	site	TFAP2C_V2	R	-1030	-1019	TCCCTTGAGGCA	7.4	0.0001	-9.188	3.99	5	2
SCARB1	site	TFAP2A_V2	R	-1030	-1019	TCCCTTGAGGCA	7.4	0.0001	-9.169	3.982	6	2
SCCPDH	site	TFAP2A_V1	D	-75	-61	CCATCCCCGAGGCCA	8.9	2.3e-05	-10.681	4.639	1	1
SCCPDH	site	TFAP2C_V1	R	-1948	-1934	ACCAGCCTCAGGCAT	8.6	3.7e-05	-10.204	4.431	2	1
SCCPDH	site	TFAP2A_V1	R	-73	-59	GATGGCCTCGGGGAT	8.2	4.9e-05	-9.932	4.313	3	2
SCCPDH	site	TFAP2C_V1	D	-75	-61	CCATCCCCGAGGCCA	8.3	5.1e-05	-9.893	4.297	4	2
SCCPDH	site	TFAP2A_V2	D	-72	-61	TCCCCGAGGCCA	8	5.7e-05	-9.772	4.244	5	1
SCCPDH	site	TFAP2C_V2	D	-72	-61	TCCCCGAGGCCA	7.7	7.5e-05	-9.499	4.126	6	1
SCCPDH	site	TFAP2C_V1	R	-73	-59	GATGGCCTCGGGGAT	7.7	9e-05	-9.314	4.045	7	3
SIGMAR1	site	TFAP2C_V2	R	-147	-136	CGCCCAGCGGCA	8.1	4.8e-05	-9.954	4.323	1	1
SIGMAR1	site	TFAP2A_V2	R	-147	-136	CGCCCAGCGGCA	8	5.7e-05	-9.772	4.244	2	1
SOAT1	site	TFAP2A_V2	R	-70	-59	TCCCCGGCGCCA	7.6	8.6e-05	-9.367	4.068	1	1
SPG20	site	TFAP2A_V1	R	-1087	-1073	ATGTGCCTCAGGCCA	10.3	3.8e-06	-12.486	5.423	1	1
SPG20	site	TFAP2C_V1	R	-1087	-1073	ATGTGCCTCAGGCCA	9.5	1.1e-05	-11.377	4.941	2	1
SPG20	site	TFAP2C_V1	D	-2070	-2056	CTCTGCTTCAGGGCT	8	6.8e-05	-9.589	4.165	3	2
SPG20	site	TFAP2A_V1	D	-2070	-2056	CTCTGCTTCAGGGCT	7.7	7.8e-05	-9.462	4.109	4	2
SPG20	site	TFAP2C_V2	R	-1087	-1076	TGCCTCAGGCCA	7.5	9.2e-05	-9.293	4.036	5	1
STAB1	site	TFAP2A_V1	D	-46	-32	CGGGGCCTCCGGGCT	8.3	4.4e-05	-10.04	4.36	1	1
STAB1	site	TFAP2A_V2	D	-107	-96	CGCCTGCAGGCT	7.8	7e-05	-9.563	4.153	2	1
STAB1	site	TFAP2A_V2	R	-107	-96	AGCCTGCAGGCG	7.6	8.6e-05	-9.367	4.068	3	2
STAB1	site	TFAP2C_V2	D	-107	-96	CGCCTGCAGGCT	7.5	9.2e-05	-9.293	4.036	4	1
STAB1	site	TFAP2C_V2	R	-107	-96	AGCCTGCAGGCG	7.5	9.2e-05	-9.293	4.036	5	2
STAB1	site	TFAP2A_V2	R	-43	-32	AGCCCGGAGGCC	7.5	9.5e-05	-9.26	4.021	6	3
STAB1	site	TFAP2C_V1	R	-2192	-2178	CCTGTCTCCAGGGCA	7.6	9.8e-05	-9.235	4.011	7	1
STAB1	site	TFAP2A_V2	D	-342	-331	TGCCTTCCGCCG	7.4	0.0001	-9.169	3.982	8	4
STAB2	site	TFAP2C_V1	D	-175	-161	CAGGGCCGCAGGGCA	9.5	1.1e-05	-11.377	4.941	1	1
STAB2	site	TFAP2A_V1	D	-175	-161	CAGGGCCGCAGGGCA	8.3	4.4e-05	-10.04	4.36	2	1
STAB2	site	TFAP2A_V2	R	-172	-161	TGCCCTGCGGCC	7.7	7.8e-05	-9.456	4.107	3	1
STARD13	site	TFAP2A_V1	D	-897	-883	GACACCCCGAGGCCT	8.8	2.6e-05	-10.557	4.585	1	1
STARD13	site	TFAP2C_V1	D	-897	-883	GACACCCCGAGGCCT	7.7	9e-05	-9.314	4.045	2	1
STARD13	site	TFAP2A_V2	D	-895	-884	CACCCCGAGGCC	7.5	9.5e-05	-9.26	4.021	3	1
TBC1D20	site	TFAP2A_V2	R	-17	-6	CGCCCCGCGCCG	10.4	1.8e-06	-13.212	5.738	1	1
TBC1D20	site	TFAP2A_V2	D	-51	-40	CGCCGCCGGCCG	9.7	6.2e-06	-11.996	5.21	2	2
TBC1D20	site	TFAP2C_V2	R	-17	-6	CGCCCCGCGCCG	8.8	1.9e-05	-10.853	4.714	3	1
TBC1D20	site	TFAP2C_V2	D	-51	-40	CGCCGCCGGCCG	8.7	2.3e-05	-10.702	4.648	4	2
TBC1D20	site	TFAP2C_V2	D	-17	-6	CGGCGCGGGGCG	8.6	2.6e-05	-10.573	4.592	5	3
TBC1D20	site	TFAP2A_V2	R	-51	-40	CGGCCGGCGGCG	8.5	3.3e-05	-10.332	4.487	6	3
TBC1D20	site	TFAP2C_V2	R	-51	-40	CGGCCGGCGGCG	8.1	4.8e-05	-9.954	4.323	7	4
TBC1D20	site	TFAP2A_V2	D	-17	-6	CGGCGCGGGGCG	8.1	5.1e-05	-9.881	4.291	8	4
TBC1D20	site	TFAP2A_V2	D	-55	-44	CCCCCGCCGCCG	7.9	6.2e-05	-9.681	4.205	9	5
THBS1	site	TFAP2A_V2	D	-345	-334	ACCCCGCGGGCC	8.7	2.5e-05	-10.593	4.6	1	1
THBS1	site	TFAP2A_V2	R	-662	-651	TGCCTTCGGGCC	8.4	3.7e-05	-10.215	4.436	2	2
THBS1	site	TFAP2C_V2	D	-662	-651	GGCCCGAAGGCA	8.3	3.7e-05	-10.197	4.429	3	1
THBS1	site	TFAP2C_V2	R	-662	-651	TGCCTTCGGGCC	8	5.3e-05	-9.844	4.275	4	2
THBS1	site	TFAP2A_V1	D	-665	-651	AAGGGCCCGAAGGCA	8.1	5.4e-05	-9.835	4.271	5	1
THBS1	site	TFAP2A_V2	D	-745	-734	CGCCCCCAAGCG	8	5.7e-05	-9.772	4.244	6	3
THBS1	site	TFAP2C_V2	D	-345	-334	ACCCCGCGGGCC	7.8	6.8e-05	-9.594	4.167	7	3
THBS1	site	TFAP2A_V2	D	-662	-651	GGCCCGAAGGCA	7.8	7e-05	-9.563	4.153	8	4
TRAP1	site	TFAP2A_V2	R	-194	-183	CGCCCCCGGCCC	8.7	2.5e-05	-10.593	4.6	1	1
TRAP1	site	TFAP2A_V2	D	-12	-1	CGCCCCGCGCCC	8.4	3.7e-05	-10.215	4.436	2	2
TRAP1	site	TFAP2C_V1	D	-110	-96	CCCACCCCCAGGCCC	8.6	3.7e-05	-10.204	4.431	3	1
TRAP1	site	TFAP2A_V1	R	-194	-180	CGCCGCCCCCGGCCC	7.7	7.8e-05	-9.462	4.109	4	1
VIMP	site	TFAP2A_V2	R	-279	-268	CGCCCGGAAGCA	7.8	7e-05	-9.563	4.153	1	1

## Sheet: Consensus Sequences
TFAP2A_V1:	A [1387 2141 727 1517 56 0 0 62 346 3738 460 0 116 451 3146 ]
	C [1630 1060 1506 519 1199 5098 4762 1736 2729 236 0 0 1443 3672 690 ]
	G [ 851 792 884 985 3712 0 0 85 1715 920 4638 5098 3455 465 168 ]
	T [1230 1105 1981 2077 131 0 336 3215 308 204 0 0 84 510 1094 ]
	JASPAR: MA0003.2
TFAP2A_V2:	A [ 678 838 15 0 10 197 1324 1697 191 5 101 1922 ]
	C [1183 1906 4006 4006 2812 1653 1439 407 34 788 4006 434 ]
	G [ 173 4006 229 10 221 831 1054 1873 4006 4006 468 979 ]
	T [1971 147 0 33 963 1324 189 28 0 10 226 671 ]
	JASPAR: MA0810.1
TFAP2C_V1:	A [ 4801 6477 2550 4918 421 0 0 0 1082 16442 191 0 285 4343 8905 ]
	C [ 6752 4693 4943 2009 6040 18426 14817 9317 14790 0 0 0 7908 9235 3259 ]
	G [ 2123 3347 2643 6098 11033 0 0 1237 1768 1195 18235 18426 10222 1788 2536 ]
	T [ 4750 3909 8290 5401 932 0 3609 7872 786 789 0 0 11 3060 3726 ]
	JASPAR: MA0524.1
TFAP2C_V2:	A [1289 878 70 24 37 516 2405 2216 163 111 254 3485 ]
	C [1427 1693 5834 5834 3594 2124 1450 341 12 742 5834 389 ]
	G [ 308 5834 621 9 384 1327 1702 3261 5834 5834 1172 1035 ]
	T [2810 139 51 121 1820 1867 277 17 16 37 599 925 ]
	JASPAR: MA0524.2

## Sheet: GO 0005811
UniProtKB	Gene Name	Annotation qualifier	GO class	Annotation extention	Evidence	Panther Family	Gene/Product name	Synonyms	Taxon	Date	Source
Q96BZ9	TBC1D20		GO:0005515	PMID:22491470	IPI	UniProtKB:P27958:PRO_0000037576	TBC1 domain family member 20	TBC20_HUMAN|C20orf140	NCBITaxon:9606	20141112	AgBase
Q96BZ9	TBC1D20		GO:0005515	PMID:17686842	IPI	UniProtKB:P27958:PRO_0000037576	TBC1 domain family member 20	TBC20_HUMAN|C20orf140	NCBITaxon:9606	20161003	IntAct
Q96BZ9	TBC1D20		GO:0005515	PMID:22491470	IPI	UniProtKB:P27958:PRO_0000037576	TBC1 domain family member 20	TBC20_HUMAN|C20orf140	NCBITaxon:9606	20161003	IntAct
Q9H6V9	LDAH		GO:0005811	GO_REF:0000024	ISS	UniProtKB:Q8BVA5	Lipid droplet-associated hydrolase	LDAH_HUMAN|C2orf43	NCBITaxon:9606	20150521	UniProt
Q9H6V9	LDAH		GO:0005811	GO_REF:0000033	IBA	PANTHER:PTN000333371	Lipid droplet-associated hydrolase	LDAH_HUMAN|C2orf43	NCBITaxon:9606	20140828	GO_Central
Q96KR4	LMLN		GO:0005811	GO_REF:0000039	IEA	UniProtKB-SubCell:SL-0154	Leishmanolysin-like peptidase	LMLN_HUMAN	NCBITaxon:9606	20161001	UniProt
Q9H4M9	EHD1		GO:0005811	GO_REF:0000024	ISS	UniProtKB:Q9WVK4	EH domain-containing protein 1	EHD1_HUMAN|PAST|PAST1|CDABP0131	NCBITaxon:9606	20091118	BHF-UCL
Q9UBP0	SPAST		GO:0005811	GO_REF:0000039	IEA	UniProtKB-SubCell:SL-0154	Spastin	SPAST_HUMAN|ADPSP|FSP2|KIAA1083|SPG4	NCBITaxon:9606	20161001	UniProt
Q8NBX0	SCCPDH		GO:0005811	PMID:14741744	IDA		Saccharopine dehydrogenase-like oxidoreductase	SCPDL_HUMAN|CGI-49	NCBITaxon:9606	20120413	UniProt
P27469	G0S2		GO:0005811	Reactome:R-HSA-1989759	TAS		G0/G1 switch protein 2	G0S2_HUMAN	NCBITaxon:9606	20130516	Reactome
Q9Y3M8	STARD13		GO:0005811	GO_REF:0000039	IEA	UniProtKB-SubCell:SL-0154	StAR-related lipid transfer protein 13	STA13_HUMAN|DLC2|GT650	NCBITaxon:9606	20161001	UniProt
Q8NBQ5	HSD17B11		GO:0005811	PMID:14741744	IDA		Estradiol 17-beta-dehydrogenase 11	DHB11_HUMAN|DHRS8|PAN1B|SDR16C2|PSEC0029|UNQ207/PRO233	NCBITaxon:9606	20120413	UniProt
Q8NHV1	GIMAP7		GO:0005811	PMID:23454188	IDA		GTPase IMAP family member 7	GIMA7_HUMAN|IAN7	NCBITaxon:9606	20130423	UniProt
Q9UHD4	CIDEB		GO:0005811	GO_REF:0000033	IBA	PANTHER:PTN000959606	Cell death activator CIDE-B	CIDEB_HUMAN	NCBITaxon:9606	20131114	GO_Central
P00387	CYB5R3		GO:0005811	PMID:14741744	IDA		NADH-cytochrome b5 reductase 3	NB5R3_HUMAN|DIA1	NCBITaxon:9606	20120413	UniProt
P07355	ANXA2		GO:0005811	PMID:14741744	IDA		Annexin A2	ANXA2_HUMAN|ANX2|ANX2L4|CAL1H|LPC2D	NCBITaxon:9606	20120413	UniProt
Q96AD5	PNPLA2		GO:0005811	PMID:21498505	IDA		Patatin-like phospholipase domain-containing protein 2	PLPL2_HUMAN|ATGL|FP17548	NCBITaxon:9606	20130819	UniProt
O60664	PLIN3		GO:0005811	PMID:14741744	IDA		Perilipin-3	PLIN3_HUMAN|M6PRBP1|TIP47	NCBITaxon:9606	20120413	UniProt
O60664	PLIN3		GO:0005811	PMID:21498505	IDA		Perilipin-3	PLIN3_HUMAN|M6PRBP1|TIP47	NCBITaxon:9606	20130816	UniProt
Q9H8H3	METTL7A		GO:0005811	GO_REF:0000039	IEA	UniProtKB-SubCell:SL-0154	Methyltransferase-like protein 7A	MET7A_HUMAN|PRO0066|UNQ1902/PRO4348	NCBITaxon:9606	20161001	UniProt
O60543	CIDEA	colocalizes_with	GO:0005811	PMID:18509062	IDA		Cell death activator CIDE-A	CIDEA_HUMAN	NCBITaxon:9606	20090610	BHF-UCL
P04406	GAPDH		GO:0005811	PMID:14741744	IDA		Glyceraldehyde-3-phosphate dehydrogenase	G3P_HUMAN|GAPD|CDABP0047|OK/SW-cl.12	NCBITaxon:9606	20120413	UniProt
O60240	PLIN1		GO:0005811	PMID:9521880	NAS		Perilipin-1	PLIN1_HUMAN|PERI|PLIN	NCBITaxon:9606	20010912	UniProt
O60240	PLIN1		GO:0005811	Reactome:R-HSA-560493	TAS		Perilipin-1	PLIN1_HUMAN|PERI|PLIN	NCBITaxon:9606	20130503	Reactome
Q96AQ7	CIDEC		GO:0005811	GO_REF:0000033	IBA	PANTHER:PTN000959606	Cell death activator CIDE-3	CIDEC_HUMAN|FSP27	NCBITaxon:9606	20131114	GO_Central
Q96CS3	FAF2		GO:0005811	PMID:14741744	IDA		FAS-associated factor 2	FAF2_HUMAN|ETEA|KIAA0887|UBXD8|UBXN3B	NCBITaxon:9606	20120413	UniProt
Q96CS3	FAF2		GO:0005811	PMID:23297223	IDA		FAS-associated factor 2	FAF2_HUMAN|ETEA|KIAA0887|UBXD8|UBXN3B	NCBITaxon:9606	20131018	MGI
Q9UG22	GIMAP2		GO:0005811	PMID:23454188	IDA		GTPase IMAP family member 2	GIMA2_HUMAN|IMAP2	NCBITaxon:9606	20130423	UniProt
Q6GMR7	FAAH2		GO:0005811	Reactome:R-HSA-5693751	TAS		Fatty-acid amide hydrolase 2	FAAH2_HUMAN|AMDD	NCBITaxon:9606	20150518	Reactome
Q7Z6Z6	PNPLA5		GO:0005811	GO_REF:0000033	IBA	PANTHER:PTN000274414	Patatin-like phospholipase domain-containing protein 5	PLPL5_HUMAN|GS2L	NCBITaxon:9606	20160530	GO_Central
Q07065	CKAP4		GO:0005811	PMID:14741744	IDA		Cytoskeleton-associated protein 4	CKAP4_HUMAN	NCBITaxon:9606	20120413	UniProt
Q9NST1	PNPLA3		GO:0005811	GO_REF:0000033	IBA	PANTHER:PTN000274414	Patatin-like phospholipase domain-containing protein 3	PLPL3_HUMAN|ADPN|C22orf20	NCBITaxon:9606	20160530	GO_Central
O60488	ACSL4		GO:0005811	PMID:14741744	IDA		Long-chain-fatty-acid--CoA ligase 4	ACSL4_HUMAN|ACS4|FACL4|LACS4	NCBITaxon:9606	20120413	UniProt
Q8N8W4	PNPLA1		GO:0005811	GO_REF:0000033	IBA	PANTHER:PTN000274414	Patatin-like phospholipase domain-containing protein 1	PLPL1_HUMAN	NCBITaxon:9606	20160530	GO_Central
Q9BWE0	REPIN1		GO:0005811	GO_REF:0000019	IEA	Ensembl:ENSMUSP00000009420	Replication initiator 1	REPI1_HUMAN|RIP60|ZNF464	NCBITaxon:9606	20161001	Ensembl
P48449	LSS		GO:0005811	PMID:14741744	IDA		Lanosterol synthase	ERG7_HUMAN|OSC	NCBITaxon:9606	20120413	UniProt
P48449	LSS		GO:0005811	PMID:21498505	IDA		Lanosterol synthase	ERG7_HUMAN|OSC	NCBITaxon:9606	20130819	UniProt
P48448	ALDH3B2		GO:0005811	Reactome:R-HSA-6808464	TAS		Aldehyde dehydrogenase family 3 member B2	AL3B2_HUMAN|ALDH8	NCBITaxon:9606	20151104	Reactome
Q99720	SIGMAR1		GO:0005811	GO_REF:0000039	IEA	UniProtKB-SubCell:SL-0154	Sigma non-opioid intracellular receptor 1	SGMR1_HUMAN|OPRS1|SRBP|AAG8	NCBITaxon:9606	20161001	UniProt
O00562	PITPNM1		GO:0005811	GO_REF:0000039	IEA	UniProtKB-SubCell:SL-0154	Membrane-associated phosphatidylinositol transfer protein 1	PITM1_HUMAN|DRES9|NIR2|PITPNM	NCBITaxon:9606	20161001	UniProt
Q8WTS1	ABHD5		GO:0005811	GO_REF:0000024	ISS	UniProtKB:Q9DBL9	1-acylglycerol-3-phosphate O-acyltransferase ABHD5	ABHD5_HUMAN|NCIE2|CGI-58	NCBITaxon:9606	20090529	UniProt
Q8WTS1	ABHD5		GO:0005811	PMID:21498505	IDA		1-acylglycerol-3-phosphate O-acyltransferase ABHD5	ABHD5_HUMAN|NCIE2|CGI-58	NCBITaxon:9606	20130819	UniProt
Q9UMS4	PRPF19		GO:0005811	GO_REF:0000039	IEA	UniProtKB-SubCell:SL-0154	Pre-mRNA-processing factor 19	PRP19_HUMAN|NMP200|PRP19|SNEV	NCBITaxon:9606	20161001	UniProt
Q96Q06	PLIN4		GO:0005811	PMID:21498505	IDA		Perilipin-4	PLIN4_HUMAN|KIAA1881	NCBITaxon:9606	20130819	UniProt
Q96PD7	DGAT2	colocalizes_with	GO:0005811	GO_REF:0000024	ISS	UniProtKB:Q9DCV3	Diacylglycerol O-acyltransferase 2	DGAT2_HUMAN|HMFN1045|UNQ738/PRO1433	NCBITaxon:9606	20111130	BHF-UCL
P16050	ALOX15		GO:0005811	PMID:19528634	IDA		Arachidonate 15-lipoxygenase	LOX15_HUMAN|LOG15	NCBITaxon:9606	20130809	UniProt
Q92538	GBF1		GO:0005811	GO_REF:0000039	IEA	UniProtKB-SubCell:SL-0154	Golgi-specific brefeldin A-resistance guanine nucleotide exchange factor 1	GBF1_HUMAN|KIAA0248	NCBITaxon:9606	20161001	UniProt
Q8TB40	ABHD4		GO:0005811	GO_REF:0000033	IBA	PANTHER:PTN000106002	Protein ABHD4	ABHD4_HUMAN	NCBITaxon:9606	20150710	GO_Central
Q7Z5P4	HSD17B13		GO:0005811	PMID:25028495	IDA		17-beta-hydroxysteroid dehydrogenase 13	DHB13_HUMAN|SCDR9|SDR16C3|HMFN0376|UNQ497/PRO1014	NCBITaxon:9606	20141018	MGI
P51149	RAB7A		GO:0005811	GO_REF:0000024	ISS	UniProtKB:P51150	Ras-related protein Rab-7a	RAB7A_HUMAN|RAB7	NCBITaxon:9606	20150723	GO_Central
P51148	RAB5C		GO:0005811	PMID:14741744	IDA		Ras-related protein Rab-5C	RAB5C_HUMAN|RABL	NCBITaxon:9606	20120413	UniProt
Q03135	CAV1		GO:0005811	Reactome:R-HSA-202144	TAS		Caveolin-1	CAV1_HUMAN|CAV	NCBITaxon:9606	20130528	Reactome
Q03135	CAV1		GO:0005811	Reactome:R-HSA-203712	TAS		Caveolin-1	CAV1_HUMAN|CAV	NCBITaxon:9606	20130528	Reactome
P61224	RAP1B		GO:0005811	PMID:14741744	IDA		Ras-related protein Rap-1b	RAP1B_HUMAN|OK/SW-cl.11	NCBITaxon:9606	20120413	UniProt
Q9BRQ8	AIFM2		GO:0005811	PMID:14741744	IDA		Apoptosis-inducing factor 2	AIFM2_HUMAN|AMID|PRG3	NCBITaxon:9606	20120413	UniProt
P51617	IRAK1		GO:0005811	GO_REF:0000024	ISS	UniProtKB:Q62406	Interleukin-1 receptor-associated kinase 1	IRAK1_HUMAN|IRAK	NCBITaxon:9606	20120611	UniProt
Q8N0X7	SPG20		GO:0005811	GO_REF:0000019	IEA	Ensembl:ENSMUSP00000113621	Spartin	SPG20_HUMAN|KIAA0610|TAHCCP1	NCBITaxon:9606	20161001	Ensembl
P55072	VCP		GO:0005811	PMID:23297223	IDA		Transitional endoplasmic reticulum ATPase	TERA_HUMAN	NCBITaxon:9606	20131018	MGI
Q2TAZ0	ATG2A		GO:0005811	GO_REF:0000039	IEA	UniProtKB-SubCell:SL-0154	Autophagy-related protein 2 homolog A	ATG2A_HUMAN|KIAA0404	NCBITaxon:9606	20161001	UniProt
Q8WXG1	RSAD2		GO:0005811	GO_REF:0000024	ISS	UniProtKB:Q8CBB9	Radical S-adenosyl methionine domain-containing protein 2	RSAD2_HUMAN|CIG5	NCBITaxon:9606	20120612	UniProt
Q15738	NSDHL		GO:0005811	PMID:14741744	IDA		Sterol-4-alpha-carboxylate 3-dehydrogenase
Q15738	NSDHL		GO:0005811	PMID:21498505	IDA		Sterol-4-alpha-carboxylate 3-dehydrogenase
Q05469	LIPE		GO:0005811	GO_REF:0000024	ISS	UniProtKB:P54310	Hormone-sensitive lipase	LIPS_HUMAN	NCBITaxon:9606	20110728	UniProt
Q9Y5L2	HILPDA		GO:0005811	PMID:20624928	IDA		Hypoxia-inducible lipid droplet-associated protein	HLPDA_HUMAN|C7orf68|HIG2	NCBITaxon:9606	20111104	UniProt
Q12931	TRAP1		GO:0005811	GO_REF:0000024	ISS	UniProtKB:A1Z6L9	Heat shock protein 75 kDa
P15090	FABP4		GO:0005811	Reactome:R-HSA-560510	TAS		Fatty acid-binding protein
Q7L5N7	LPCAT2		GO:0005811	PMID:21498505	IDA		Lysophosphatidylcholine acyltransferase 2	PCAT2_HUMAN|AGPAT11|AYTL1	NCBITaxon:9606	20130816	UniProt
Q9Y4K3	TRAF6		GO:0005811	GO_REF:0000024	ISS	UniProtKB:P70196	TNF receptor-associated factor 6	TRAF6_HUMAN|RNF85	NCBITaxon:9606	20120611	UniProt
O00273	DFFA	not	GO:0005811	GO_REF:0000033	IBA	PANTHER:PTN000267118	DNA fragmentation factor subunit alpha	DFFA_HUMAN|DFF1|DFF45|H13	NCBITaxon:9606	20131114	GO_Central
P51572	BCAP31		GO:0005811	PMID:14741744	IDA		B-cell receptor-associated protein 31	BAP31_HUMAN|BAP31|DXS1357E	NCBITaxon:9606	20120413	UniProt
Q15042	RAB3GAP1		GO:0005811	PMID:25495476	IDA		Rab3 GTPase-activating protein catalytic subunit	RB3GP_HUMAN|KIAA0066|RAB3GAP	NCBITaxon:9606	20150626	GO_Central
P41247	PNPLA4		GO:0005811	GO_REF:0000033	IBA	PANTHER:PTN000274414	Patatin-like phospholipase domain-containing protein 4	PLPL4_HUMAN|DXS1283E|GS2	NCBITaxon:9606	20160530	GO_Central
Q99541	PLIN2		GO:0005811	PMID:14741744	IDA		Perilipin-2	PLIN2_HUMAN|ADFP	NCBITaxon:9606	20120413	UniProt
Q00G26	PLIN5	colocalizes_with	GO:0005811	GO_REF:0000024	ISS	UniProtKB:Q8BVZ1	Perilipin-5	PLIN5_HUMAN|LSDP5|OXPAT|PAT-1	NCBITaxon:9606	20140403	UniProt
Q96BY7	ATG2B		GO:0005811	GO_REF:0000039	IEA	UniProtKB-SubCell:SL-0154	Autophagy-related protein 2 homolog B	ATG2B_HUMAN|C14orf103	NCBITaxon:9606	20161001	UniProt
Q8NF37	LPCAT1		GO:0005811	PMID:21498505	IDA		Lysophosphatidylcholine acyltransferase 1	PCAT1_HUMAN|AYTL2|PFAAP3	NCBITaxon:9606	20130816	UniProt
O95573	ACSL3		GO:0005811	PMID:14741744	IDA		Long-chain-fatty-acid--CoA ligase 3	ACSL3_HUMAN|ACS3|FACL3|LACS3	NCBITaxon:9606	20120413	UniProt
O95573	ACSL3		GO:0005811	PMID:21498505	IDA		Long-chain-fatty-acid--CoA ligase 3	ACSL3_HUMAN|ACS3|FACL3|LACS3	NCBITaxon:9606	20130816	UniProt
Q9NP72	RAB18		GO:0034389	PMID:24239381	IMP		Ras-related protein Rab-18	RAB18_HUMAN	NCBITaxon:9606	20140416	MGI
Q96BZ9	TBC1D20		GO:0034389	GO_REF:0000019	IEA	Ensembl:ENSMUSP00000028963	TBC1 domain family member 20	TBC20_HUMAN|C20orf140	NCBITaxon:9606	20161001	Ensembl
Q96AD5	PNPLA2		GO:0034389	GO_REF:0000019	IEA	Ensembl:ENSMUSP00000127149	Patatin-like phospholipase domain-containing protein 2	PLPL2_HUMAN|ATGL|FP17548	NCBITaxon:9606	20161001	Ensembl
Q96AQ7	CIDEC		GO:0034389	PMID:20049731	IMP		Cell death activator CIDE-3	CIDEC_HUMAN|FSP27	NCBITaxon:9606	20130618	UniProt
P62937	PPIA		GO:0034389	PMID:21711559	IMP		Peptidyl-prolyl cis-trans isomerase A	PPIA_HUMAN|CYPA	NCBITaxon:9606	20130110	UniProt
Q96CS3	FAF2		GO:0034389	PMID:23297223	IMP		FAS-associated factor 2	FAF2_HUMAN|ETEA|KIAA0887|UBXD8|UBXN3B	NCBITaxon:9606	20131018	MGI
Q8N6M3	FITM2		GO:0034389	GO_REF:0000024	ISS	UniProtKB:P59266	Fat storage-inducing transmembrane protein 2	FITM2_HUMAN|C20orf142|FIT2	NCBITaxon:9606	20110210	UniProt
Q8N6M3	FITM2		GO:0034389	GO_REF:0000033	IBA	PANTHER:PTN000565881	Fat storage-inducing transmembrane protein 2	FITM2_HUMAN|C20orf142|FIT2	NCBITaxon:9606	20141029	GO_Central
Q8N6M3	FITM2		GO:0034389	PMID:18160536	ISS	UniProtKB:P59266	Fat storage-inducing transmembrane protein 2	FITM2_HUMAN|C20orf142|FIT2	NCBITaxon:9606	20100303	BHF-UCL
Q9P2B2	PTGFRN		GO:0034389	GO_REF:0000019	IEA	Ensembl:ENSMUSP00000099755	Prostaglandin F2 receptor negative regulator	FPRP_HUMAN|CD9P1|EWIF|FPRP|KIAA1436	NCBITaxon:9606	20161001	Ensembl
Q08752	PPID		GO:0034389	PMID:21711559	IMP		Peptidyl-prolyl cis-trans isomerase D	PPID_HUMAN|CYP40|CYPD	NCBITaxon:9606	20130110	UniProt
O94830	DDHD2		GO:0034389	GO_REF:0000019	IEA	Ensembl:ENSMUSP00000033975	Phospholipase DDHD2	DDHD2_HUMAN|KIAA0725|SAMWD1	NCBITaxon:9606	20161001	Ensembl
Q8N0X7	SPG20		GO:0034389	GO_REF:0000019	IEA	Ensembl:ENSMUSP00000113621	Spartin	SPG20_HUMAN|KIAA0610|TAHCCP1	NCBITaxon:9606	20161001	Ensembl
A5D6W6	FITM1		GO:0034389	GO_REF:0000033	IBA	PANTHER:PTN000565881	Fat storage-inducing transmembrane protein 1	FITM1_HUMAN|FIT1	NCBITaxon:9606	20141029	GO_Central
A5D6W6	FITM1		GO:0034389	PMID:18160536	ISS	UniProtKB:Q91V79	Fat storage-inducing transmembrane protein 1	FITM1_HUMAN|FIT1	NCBITaxon:9606	20100303	BHF-UCL
Q15042	RAB3GAP1		GO:0034389	PMID:24239381	IMP		Rab3 GTPase-activating protein catalytic subunit	RB3GP_HUMAN|KIAA0066|RAB3GAP	NCBITaxon:9606	20140331	MGI
Q00G26	PLIN5		GO:0034389	GO_REF:0000024	ISS	UniProtKB:Q8BVZ1	Perilipin-5	PLIN5_HUMAN|LSDP5|OXPAT|PAT-1	NCBITaxon:9606	20140407	UniProt
Q96G97	BSCL2		GO:0034389	PMID:19278620	IMP		Seipin	BSCL2_HUMAN	NCBITaxon:9606	20120618	UniProt
P10636	MAPT		GO:0071813	PMID:7972031	IPI	UniProtKB:P02649	Microtubule-associated protein tau	TAU_HUMAN|MAPTL|MTBT1|TAU	NCBITaxon:9606	20100928	UniProt
P02649	APOE		GO:0071813	GO_REF:0000019	IEA	Ensembl:ENSMUSP00000133302	Apolipoprotein E	APOE_HUMAN	NCBITaxon:9606	20161001	Ensembl
Q8IV16	GPIHBP1		GO:0035478	PMID:19304573	IDA		Glycosylphosphatidylinositol-anchored high density lipoprotein-binding protein 1	HDBP1_HUMAN|HBP1	NCBITaxon:9606	20140117	BHF-UCL
Q8IV16	GPIHBP1		GO:0071813	PMID:17997385	IDA		Glycosylphosphatidylinositol-anchored high density lipoprotein-binding protein 1	HDBP1_HUMAN|HBP1	NCBITaxon:9606	20100928	UniProt
P55290	CDH13		GO:0071813	PMID:11027617	IDA		Cadherin-13	CAD13_HUMAN|CDHH	NCBITaxon:9606	20100928	UniProt
P16671	CD36		GO:0071813	PMID:9568716	IDA		Platelet glycoprotein 4	CD36_HUMAN|GP3B|GP4	NCBITaxon:9606	20100928	UniProt
Q0VD83	APOBR		GO:0042627	GO_REF:0000037	IEA	UniProtKB-KW:KW-0162	Apolipoprotein B receptor	APOBR_HUMAN|APOB48R	NCBITaxon:9606	20161001	UniProt
Q8NBP7	PCSK9		GO:0030169	GO_REF:0000024	ISS	UniProtKB:Q80W65	Proprotein convertase subtilisin/kexin type 9	PCSK9_HUMAN|NARC1|PSEC0052	NCBITaxon:9606	20120702	UniProt
Q8NBP7	PCSK9		GO:0034189	GO_REF:0000024	ISS	UniProtKB:Q80W65	Proprotein convertase subtilisin/kexin type 9	PCSK9_HUMAN|NARC1|PSEC0052	NCBITaxon:9606	20120702	UniProt
P98155	VLDLR		GO:0034189	PMID:10571240	IDA		Very low-density lipoprotein receptor	VLDLR_HUMAN	NCBITaxon:9606	20111118	BHF-UCL
URS0000272039_9606	URS0000272039_9606		GO:0042632	PMID:25149060	IDA		Homo sapiens (human) hsa-miR-590-3p.		NCBITaxon:9606	20160126	BHF-UCL
P08519	LPA		GO:0034358	PMID:2531657	IDA		Apolipoprotein(a)	APOA_HUMAN	NCBITaxon:9606	20110114	BHF-UCL
Q92673	SORL1		GO:0030169	PMID:17326667	IPI	UniProtKB:P02649	Sortilin-related receptor	SORL_HUMAN|C11orf32	NCBITaxon:9606	20080111	BHF-UCL
Q92673	SORL1		GO:0030169	PMID:17326667	IPI	UniProtKB:Q6Q788	Sortilin-related receptor	SORL_HUMAN|C11orf32	NCBITaxon:9606	20080111	BHF-UCL
P06858	LPL		GO:0042627	GO_REF:0000037	IEA	UniProtKB-KW:KW-0162	Lipoprotein lipase	LIPL_HUMAN|LIPD	NCBITaxon:9606	20161001	UniProt
P06858	LPL		GO:0042632	PMID:25149060	IMP		Lipoprotein lipase	LIPL_HUMAN|LIPD	NCBITaxon:9606	20160126	BHF-UCL
P21757	MSR1		GO:0030169	PMID:12376530	ISS	UniProtKB:P30204	Macrophage scavenger receptor types I and II	MSRE_HUMAN|SCARA1	NCBITaxon:9606	20090126	BHF-UCL
Q9BQE5	APOL2		GO:0008035	PMID:11374903	NAS		Apolipoprotein L2	APOL2_HUMAN	NCBITaxon:9606	20080408	UniProt
P07996	THBS1		GO:0030169	PMID:6693501	IDA		Thrombospondin-1	TSP1_HUMAN|TSP|TSP1	NCBITaxon:9606	20090714	BHF-UCL
Q9NY15	STAB1		GO:0030169	PMID:12077138	IDA		Stabilin-1	STAB1_HUMAN|FEEL1|KIAA0246	NCBITaxon:9606	20040817	UniProt
P04114	APOB		GO:0042627	PMID:4363408	IDA		Apolipoprotein B-100	APOB_HUMAN	NCBITaxon:9606	20080423	BHF-UCL
P04114	APOB		GO:0042627	PMID:8245722	IDA		Apolipoprotein B-100	APOB_HUMAN	NCBITaxon:9606	20080104	BHF-UCL
Q8WTV0	SCARB1		GO:0008035	GO_REF:0000019	IEA	Ensembl:ENSMUSP00000083242	Scavenger receptor class B member 1	SCRB1_HUMAN|CD36L1|CLA1	NCBITaxon:9606	20161001	Ensembl
Q8WTV0	SCARB1		GO:0030169	PMID:9211901	IDA		Scavenger receptor class B member 1	SCRB1_HUMAN|CD36L1|CLA1	NCBITaxon:9606	20090313	BHF-UCL
P02656	APOC3		GO:0042627	PMID:8245722	IDA		Apolipoprotein C-III	APOC3_HUMAN	NCBITaxon:9606	20080104	BHF-UCL
P02655	APOC2		GO:0042627	PMID:8245722	IDA		Apolipoprotein C-II	APOC2_HUMAN|APC2	NCBITaxon:9606	20080104	BHF-UCL
P02654	APOC1		GO:0042627	PMID:18992221	TAS		Apolipoprotein C-I	APOC1_HUMAN	NCBITaxon:9606	20090205	BHF-UCL
P02652	APOA2		GO:0008035	GO_REF:0000033	IBA	PANTHER:PTN000111938	Apolipoprotein A-II	APOA2_HUMAN	NCBITaxon:9606	20150723	GO_Central
P02652	APOA2		GO:0042627	PMID:8245722	IDA		Apolipoprotein A-II	APOA2_HUMAN	NCBITaxon:9606	20080104	BHF-UCL
P02649	APOE		GO:0042627	PMID:16935699	IDA		Apolipoprotein E	APOE_HUMAN	NCBITaxon:9606	20080211	BHF-UCL
P02649	APOE		GO:0042627	PMID:8245722	IDA		Apolipoprotein E	APOE_HUMAN	NCBITaxon:9606	20080104	BHF-UCL
P02647	APOA1		GO:0008035	GO_REF:0000019	IEA	Ensembl:ENSMUSP00000034588	Apolipoprotein A-I	APOA1_HUMAN	NCBITaxon:9606	20161001	Ensembl
P02647	APOA1		GO:0042627	GO_REF:0000033	IBA	PANTHER:PTN000439006	Apolipoprotein A-I	APOA1_HUMAN	NCBITaxon:9606	20141124	GO_Central
Q8IV16	GPIHBP1		GO:0008035	GO_REF:0000019	IEA	Ensembl:ENSMUSP00000023243	Glycosylphosphatidylinositol-anchored high density lipoprotein-binding protein 1	HDBP1_HUMAN|HBP1	NCBITaxon:9606	20161001	Ensembl
Q9BWW9	APOL5		GO:0008035	PMID:11374903	NAS		Apolipoprotein L5	APOL5_HUMAN	NCBITaxon:9606	20020806	UniProt
P02749	APOH		GO:0042627	PMID:222615	IDA		Beta-2-glycoprotein 1	APOH_HUMAN|B2G1	NCBITaxon:9606	20080402	BHF-UCL
P02741	CRP		GO:0030169	PMID:18322245	IDA		C-reactive protein	CRP_HUMAN|PTX1	NCBITaxon:9606	20090116	BHF-UCL
Q9H9E1	ANKRA2		GO:0030169	PMID:11095640	IDA		Ankyrin repeat family A protein 2	ANRA2_HUMAN|ANKRA	NCBITaxon:9606	20010829	UniProt
P55290	CDH13		GO:0030169	PMID:16013438	IDA		Cadherin-13	CAD13_HUMAN|CDHH	NCBITaxon:9606	20071113	BHF-UCL
Q5KU26	COLEC12		GO:0030169	PMID:11564734	IDA		Collectin-12	COL12_HUMAN|CLP1|NSR2|SCARA4|SRCL	NCBITaxon:9606	20080213	UniProt
Q8WWQ8	STAB2		GO:0030169	PMID:12077138	IDA		Stabilin-2	STAB2_HUMAN|FEEL2|FELL|FEX2|HARE	NCBITaxon:9606	20050308	UniProt
P11150	LIPC		GO:0030169	GO_REF:0000024	ISS	UniProtKB:P07867	Hepatic triacylglycerol lipase	LIPC_HUMAN|HTGL	NCBITaxon:9606	20090508	BHF-UCL
P16671	CD36		GO:0008035	GO_REF:0000019	IEA	Ensembl:ENSMUSP00000133008	Platelet glycoprotein 4	CD36_HUMAN|GP3B|GP4	NCBITaxon:9606	20161001	Ensembl
P16671	CD36		GO:0030169	PMID:10772654	IDA		Platelet glycoprotein 4	CD36_HUMAN|GP3B|GP4	NCBITaxon:9606	20090114	BHF-UCL
Q6Q788	APOA5		GO:0042627	PMID:15528295	IDA		Apolipoprotein A-V	APOA5_HUMAN|RAP3|UNQ411/PRO773	NCBITaxon:9606	20050215	UniProt
Q14162	SCARF1		GO:0030169	PMID:9395444	IDA		Scavenger receptor class F member 1	SREC_HUMAN|KIAA0149|SREC	NCBITaxon:9606	20020502	UniProt
Q14114	LRP8		GO:0008035	GO_REF:0000019	IEA	Ensembl:ENSRNOP00000017575	Low-density lipoprotein receptor-related protein 8	LRP8_HUMAN|APOER2	NCBITaxon:9606	20161001	Ensembl
P06727	APOA4		GO:0042627	PMID:3095477	IDA		Apolipoprotein A-IV	APOA4_HUMAN	NCBITaxon:9606	20080107	BHF-UCL
P01130	LDLR		GO:0030169	GO_REF:0000019	IEA	Ensembl:ENSMUSP00000034713	Low-density lipoprotein receptor	LDLR_HUMAN	NCBITaxon:9606	20161001	Ensembl
Q86X29	LSR		GO:0042627	GO_REF:0000037	IEA	UniProtKB-KW:KW-0162	Lipolysis-stimulated lipoprotein receptor	LSR_HUMAN|LISCH	NCBITaxon:9606	20161001	UniProt
P00739	HPR		GO:0034366	PMID:16682745	IDA		Haptoglobin-related protein	HPTR_HUMAN	NCBITaxon:9606	20090507	BHF-UCL
P10909	CLU		GO:0034366	PMID:16682745	IDA		Clusterin	CLUS_HUMAN|APOJ|CLI|KUB1|AAG4	NCBITaxon:9606	20090507	BHF-UCL
O95445	APOM		GO:0034361	PMID:17154273	IDA		Apolipoprotein M	APOM_HUMAN|G3A|NG20|HSPC336	NCBITaxon:9606	20090528	BHF-UCL
O95445	APOM		GO:0034362	PMID:16682745	IDA		Apolipoprotein M	APOM_HUMAN|G3A|NG20|HSPC336	NCBITaxon:9606	20090507	BHF-UCL
O95445	APOM		GO:0034364	PMID:22204862	IDA		Apolipoprotein M	APOM_HUMAN|G3A|NG20|HSPC336	NCBITaxon:9606	20120531	BHF-UCL
O95445	APOM		GO:0034365	PMID:15793583	IDA		Apolipoprotein M	APOM_HUMAN|G3A|NG20|HSPC336	NCBITaxon:9606	20090507	BHF-UCL
O95445	APOM		GO:0034366	PMID:16682745	IDA		Apolipoprotein M	APOM_HUMAN|G3A|NG20|HSPC336	NCBITaxon:9606	20090507	BHF-UCL
Q0VD83	APOBR		GO:0034361	GO_REF:0000037	IEA	UniProtKB-KW:KW-0850	Apolipoprotein B receptor	APOBR_HUMAN|APOB48R	NCBITaxon:9606	20161001	UniProt
Q0VD83	APOBR		GO:0034362	GO_REF:0000037	IEA	UniProtKB-KW:KW-0427	Apolipoprotein B receptor	APOBR_HUMAN|APOB48R	NCBITaxon:9606	20161001	UniProt
P0DJI9	SAA2		GO:0034364	GO_REF:0000037	IEA	UniProtKB-KW:KW-0345	Serum amyloid A-2 protein	SAA2_HUMAN	NCBITaxon:9606	20161001	UniProt
P0DJI8	SAA1		GO:0034364	GO_REF:0000037	IEA	UniProtKB-KW:KW-0345	Serum amyloid A-1 protein	SAA1_HUMAN	NCBITaxon:9606	20161001	UniProt
Q9UHG3	PCYOX1		GO:0034361	PMID:17154273	IDA		Prenylcysteine oxidase 1	PCYOX_HUMAN|KIAA0908|PCL1|UNQ597/PRO1183	NCBITaxon:9606	20090528	BHF-UCL
P98155	VLDLR		GO:0034361	GO_REF:0000037	IEA	UniProtKB-KW:KW-0850	Very low-density lipoprotein receptor	VLDLR_HUMAN	NCBITaxon:9606	20161001	UniProt
P27169	PON1		GO:0034364	PMID:10479665	TAS		Serum paraoxonase/arylesterase 1	PON1_HUMAN|PON	NCBITaxon:9606	20090205	BHF-UCL
P27169	PON1		GO:0034364	PMID:15721011	IDA		Serum paraoxonase/arylesterase 1	PON1_HUMAN|PON	NCBITaxon:9606	20090507	BHF-UCL
P27169	PON1		GO:0034366	PMID:16682745	IDA		Serum paraoxonase/arylesterase 1	PON1_HUMAN|PON	NCBITaxon:9606	20090507	BHF-UCL
O95477	ABCA1		GO:0034364	GO_REF:0000019	IEA	Ensembl:ENSRNOP00000024564	ATP-binding cassette sub-family A member 1	ABCA1_HUMAN|ABC1|CERP	NCBITaxon:9606	20161001	Ensembl
Q00341	HDLBP		GO:0034364	GO_REF:0000037	IEA	UniProtKB-KW:KW-0345	Vigilin	VIGLN_HUMAN|HBP|VGL	NCBITaxon:9606	20161001	UniProt
P11597	CETP		GO:0034364	PMID:3104518	IDA		Cholesteryl ester transfer protein	CETP_HUMAN	NCBITaxon:9606	20080509	BHF-UCL
Q92673	SORL1		GO:0034362	GO_REF:0000037	IEA	UniProtKB-KW:KW-0427	Sortilin-related receptor	SORL_HUMAN|C11orf32	NCBITaxon:9606	20161001	UniProt
P06858	LPL		GO:0034361	GO_REF:0000037	IEA	UniProtKB-KW:KW-0850	Lipoprotein lipase	LIPL_HUMAN|LIPD	NCBITaxon:9606	20161001	UniProt
P21757	MSR1		GO:0034362	GO_REF:0000037	IEA	UniProtKB-KW:KW-0427	Macrophage scavenger receptor types I and II	MSRE_HUMAN|SCARA1	NCBITaxon:9606	20161001	UniProt
Q9BQE4	VIMP		GO:0034361	PMID:17374524	IDA		Selenoprotein S	SELS_HUMAN|SELS|AD-015|SBBI8	NCBITaxon:9606	20080509	BHF-UCL
Q9BQE4	VIMP		GO:0034362	PMID:17374524	IDA		Selenoprotein S	SELS_HUMAN|SELS|AD-015|SBBI8	NCBITaxon:9606	20080509	BHF-UCL
P04114	APOB		GO:0034359	PMID:4363408	IDA		Apolipoprotein B-100	APOB_HUMAN	NCBITaxon:9606	20080801	BHF-UCL
P04114	APOB		GO:0034360	PMID:6099394	TAS		Apolipoprotein B-100	APOB_HUMAN	NCBITaxon:9606	20080801	BHF-UCL
P04114	APOB		GO:0034361	PMID:15308631	IDA		Apolipoprotein B-100	APOB_HUMAN	NCBITaxon:9606	20090209	BHF-UCL
P04114	APOB		GO:0034361	PMID:4363408	IDA		Apolipoprotein B-100	APOB_HUMAN	NCBITaxon:9606	20080801	BHF-UCL
P04114	APOB		GO:0034362	PMID:4363408	IDA		Apolipoprotein B-100	APOB_HUMAN	NCBITaxon:9606	20080801	BHF-UCL
P04114	APOB		GO:0034363	PMID:1917954	IDA		Apolipoprotein B-100	APOB_HUMAN	NCBITaxon:9606	20090205	BHF-UCL
Q9BUR5	APOO		GO:0034361	GO_REF:0000037	IEA	UniProtKB-KW:KW-0850	MICOS complex subunit MIC26	MIC26_HUMAN|FAM121B|MIC23|MIC26|My025|UNQ1866/PRO4302	NCBITaxon:9606	20161001	UniProt
Q9BUR5	APOO		GO:0034362	GO_REF:0000037	IEA	UniProtKB-KW:KW-0427	MICOS complex subunit MIC26	MIC26_HUMAN|FAM121B|MIC23|MIC26|My025|UNQ1866/PRO4302	NCBITaxon:9606	20161001	UniProt
Q9BUR5	APOO		GO:0034364	GO_REF:0000037	IEA	UniProtKB-KW:KW-0345	MICOS complex subunit MIC26	MIC26_HUMAN|FAM121B|MIC23|MIC26|My025|UNQ1866/PRO4302	NCBITaxon:9606	20161001	UniProt
Q13093	PLA2G7		GO:0034362	PMID:8624782	IDA		Platelet-activating factor acetylhydrolase	PAFA_HUMAN|PAFAH	NCBITaxon:9606	20110708	BHF-UCL
P02656	APOC3		GO:0034361	PMID:16935699	IDA		Apolipoprotein C-III	APOC3_HUMAN	NCBITaxon:9606	20080509	BHF-UCL
P02656	APOC3		GO:0034361	PMID:17154273	IDA		Apolipoprotein C-III	APOC3_HUMAN	NCBITaxon:9606	20090528	BHF-UCL
P02656	APOC3		GO:0034361	PMID:3973011	IDA		Apolipoprotein C-III	APOC3_HUMAN	NCBITaxon:9606	20090515	BHF-UCL
P02656	APOC3		GO:0034363	PMID:17336988	IDA		Apolipoprotein C-III	APOC3_HUMAN	NCBITaxon:9606	20080509	BHF-UCL
P02656	APOC3		GO:0034366	PMID:17438339	IDA		Apolipoprotein C-III	APOC3_HUMAN	NCBITaxon:9606	20080509	BHF-UCL
P02655	APOC2		GO:0034361	PMID:8245722	IDA		Apolipoprotein C-II	APOC2_HUMAN|APC2	NCBITaxon:9606	20080509	BHF-UCL
P02655	APOC2		GO:0034362	PMID:8245722	IDA		Apolipoprotein C-II	APOC2_HUMAN|APC2	NCBITaxon:9606	20080509	BHF-UCL
P02655	APOC2		GO:0034363	PMID:17336988	IDA		Apolipoprotein C-II	APOC2_HUMAN|APC2	NCBITaxon:9606	20080509	BHF-UCL
P02655	APOC2		GO:0034366	PMID:16682745	IDA		Apolipoprotein C-II	APOC2_HUMAN|APC2	NCBITaxon:9606	20090507	BHF-UCL
P02654	APOC1		GO:0034361	PMID:15576844	IDA		Apolipoprotein C-I	APOC1_HUMAN	NCBITaxon:9606	20090205	BHF-UCL
P02654	APOC1		GO:0034364	PMID:15576844	IDA		Apolipoprotein C-I	APOC1_HUMAN	NCBITaxon:9606	20090205	BHF-UCL
P02652	APOA2		GO:0034361	PMID:8245722	IDA		Apolipoprotein A-II	APOA2_HUMAN	NCBITaxon:9606	20080509	BHF-UCL
P02652	APOA2		GO:0034364	PMID:17264082	IDA		Apolipoprotein A-II	APOA2_HUMAN	NCBITaxon:9606	20080509	BHF-UCL
P02652	APOA2		GO:0034364	PMID:210174	IDA		Apolipoprotein A-II	APOA2_HUMAN	NCBITaxon:9606	20080509	BHF-UCL
P02652	APOA2		GO:0034364	PMID:3104518	IDA		Apolipoprotein A-II	APOA2_HUMAN	NCBITaxon:9606	20080509	BHF-UCL
P02652	APOA2		GO:0034366	PMID:16682745	IDA		Apolipoprotein A-II	APOA2_HUMAN	NCBITaxon:9606	20090507	BHF-UCL
P02649	APOE		GO:0034361	PMID:17154273	IDA		Apolipoprotein E	APOE_HUMAN	NCBITaxon:9606	20090528	BHF-UCL
P02649	APOE		GO:0034361	PMID:8245722	IDA		Apolipoprotein E	APOE_HUMAN	NCBITaxon:9606	20080509	BHF-UCL
P02649	APOE		GO:0034362	PMID:8245722	IDA		Apolipoprotein E	APOE_HUMAN	NCBITaxon:9606	20080509	BHF-UCL
P02649	APOE		GO:0034363	PMID:17336988	IDA		Apolipoprotein E	APOE_HUMAN	NCBITaxon:9606	20080509	BHF-UCL
P02649	APOE		GO:0034364	PMID:210174	IDA		Apolipoprotein E	APOE_HUMAN	NCBITaxon:9606	20080509	BHF-UCL
P02647	APOA1		GO:0034361	PMID:17154273	IDA		Apolipoprotein A-I	APOA1_HUMAN	NCBITaxon:9606	20090528	BHF-UCL
P02647	APOA1		GO:0034364	PMID:15464323	IDA		Apolipoprotein A-I	APOA1_HUMAN	NCBITaxon:9606	20080509	BHF-UCL
P02647	APOA1		GO:0034364	PMID:210174	IDA		Apolipoprotein A-I	APOA1_HUMAN	NCBITaxon:9606	20080509	BHF-UCL
P02647	APOA1		GO:0034364	PMID:21571275	IDA		Apolipoprotein A-I	APOA1_HUMAN	NCBITaxon:9606	20120601	BHF-UCL
P02647	APOA1		GO:0034364	PMID:3104518	IDA		Apolipoprotein A-I	APOA1_HUMAN	NCBITaxon:9606	20080509	BHF-UCL
P02647	APOA1		GO:0034365	GO_REF:0000019	IEA	Ensembl:ENSRNOP00000065206	Apolipoprotein A-I	APOA1_HUMAN	NCBITaxon:9606	20161001	Ensembl
P02647	APOA1		GO:0034366	PMID:16682745	IDA		Apolipoprotein A-I	APOA1_HUMAN	NCBITaxon:9606	20090507	BHF-UCL
Q13790	APOF		GO:0034362	GO_REF:0000037	IEA	UniProtKB-KW:KW-0427	Apolipoprotein F	APOF_HUMAN	NCBITaxon:9606	20161001	UniProt
Q13790	APOF		GO:0034364	GO_REF:0000037	IEA	UniProtKB-KW:KW-0345	Apolipoprotein F	APOF_HUMAN	NCBITaxon:9606	20161001	UniProt
Q8IV16	GPIHBP1		GO:0034364	GO_REF:0000037	IEA	UniProtKB-KW:KW-0345	Glycosylphosphatidylinositol-anchored high density lipoprotein-binding protein 1	HDBP1_HUMAN|HBP1	NCBITaxon:9606	20161001	UniProt
P02749	APOH		GO:0034361	PMID:222615	IDA		Beta-2-glycoprotein 1	APOH_HUMAN|B2G1	NCBITaxon:9606	20080801	BHF-UCL
P02749	APOH		GO:0034364	PMID:222615	IDA		Beta-2-glycoprotein 1	APOH_HUMAN|B2G1	NCBITaxon:9606	20080801	BHF-UCL
O14791	APOL1		GO:0034361	PMID:17154273	IDA		Apolipoprotein L1	APOL1_HUMAN|APOL	NCBITaxon:9606	20090528	BHF-UCL
O14791	APOL1		GO:0034364	PMID:9325276	IDA		Apolipoprotein L1	APOL1_HUMAN|APOL	NCBITaxon:9606	20080801	BHF-UCL
P11150	LIPC		GO:0034364	GO_REF:0000037	IEA	UniProtKB-KW:KW-0345	Hepatic triacylglycerol lipase	LIPC_HUMAN|HTGL	NCBITaxon:9606	20161001	UniProt
Q6Q788	APOA5		GO:0034361	PMID:15528295	IDA		Apolipoprotein A-V	APOA5_HUMAN|RAP3|UNQ411/PRO773	NCBITaxon:9606	20080509	BHF-UCL
Q6Q788	APOA5		GO:0034364	PMID:15528295	IDA		Apolipoprotein A-V	APOA5_HUMAN|RAP3|UNQ411/PRO773	NCBITaxon:9606	20080509	BHF-UCL
Q6Q788	APOA5	not	GO:0034362	PMID:15528295	IDA		Apolipoprotein A-V	APOA5_HUMAN|RAP3|UNQ411/PRO773	NCBITaxon:9606	20080509	BHF-UCL
P04180	LCAT		GO:0034364	PMID:3104518	IDA		Phosphatidylcholine-sterol acyltransferase	LCAT_HUMAN	NCBITaxon:9606	20080509	BHF-UCL
P35542	SAA4		GO:0034364	GO_REF:0000037	IEA	UniProtKB-KW:KW-0345	Serum amyloid A-4 protein	SAA4_HUMAN|CSAA	NCBITaxon:9606	20161001	UniProt
P06727	APOA4		GO:0034361	PMID:17154273	IDA		Apolipoprotein A-IV	APOA4_HUMAN	NCBITaxon:9606	20090528	BHF-UCL
P06727	APOA4		GO:0034361	PMID:3095477	IDA		Apolipoprotein A-IV	APOA4_HUMAN	NCBITaxon:9606	20080509	BHF-UCL
P06727	APOA4		GO:0034364	PMID:3095477	IDA		Apolipoprotein A-IV	APOA4_HUMAN	NCBITaxon:9606	20080509	BHF-UCL
P01130	LDLR		GO:0034362	GO_REF:0000037	IEA	UniProtKB-KW:KW-0427	Low-density lipoprotein receptor	LDLR_HUMAN	NCBITaxon:9606	20161001	UniProt
Q86X29	LSR		GO:0034361	GO_REF:0000037	IEA	UniProtKB-KW:KW-0850	Lipolysis-stimulated lipoprotein receptor	LSR_HUMAN|LISCH	NCBITaxon:9606	20161001	UniProt
Q86X29	LSR		GO:0034362	GO_REF:0000037	IEA	UniProtKB-KW:KW-0427	Lipolysis-stimulated lipoprotein receptor	LSR_HUMAN|LISCH	NCBITaxon:9606	20161001	UniProt
P55056	APOC4		GO:0034361	PMID:12700345	IDA		Apolipoprotein C-IV	APOC4_HUMAN	NCBITaxon:9606	20090528	BHF-UCL
P55056	APOC4		GO:0034361	PMID:17154273	IDA		Apolipoprotein C-IV	APOC4_HUMAN	NCBITaxon:9606	20090528	BHF-UCL
P55056	APOC4		GO:0034361	PMID:8827523	IMP		Apolipoprotein C-IV	APOC4_HUMAN	NCBITaxon:9606	20090528	BHF-UCL
P55056	APOC4		GO:0034364	PMID:12700345	IDA		Apolipoprotein C-IV	APOC4_HUMAN	NCBITaxon:9606	20090528	BHF-UCL
P02654	APOC1		GO:0034369	PMID:10978346	IDA		Apolipoprotein C-I	APOC1_HUMAN	NCBITaxon:9606	20090206	BHF-UCL
Q9UPG8	PLAGL2		GO:0034378	GO_REF:0000033	IBA	PANTHER:PTN000003391	Zinc finger protein PLAGL2	PLAL2_HUMAN|KIAA0198	NCBITaxon:9606	20130211	GO_Central
P30556	AGTR1		GO:0034374	PMID:17069818	NAS		Type-1 angiotensin II receptor	AGTR1_HUMAN|AGTR1A|AGTR1B|AT2R1|AT2R1B	NCBITaxon:9606	20090115	BHF-UCL
O95445	APOM		GO:0034375	PMID:18006500	IMP		Apolipoprotein M	APOM_HUMAN|G3A|NG20|HSPC336	NCBITaxon:9606	20090507	BHF-UCL
O95445	APOM		GO:0034380	PMID:15793583	ISS	UniProtKB:Q9Z1R3	Apolipoprotein M	APOM_HUMAN|G3A|NG20|HSPC336	NCBITaxon:9606	20090507	BHF-UCL
P84077	ARF1		GO:0034379	GO_REF:0000019	IEA	Ensembl:ENSRNOP00000072575	ADP-ribosylation factor 1	ARF1_HUMAN	NCBITaxon:9606	20161001	Ensembl
O75908	SOAT2		GO:0034379	PMID:15308631	IMP		Sterol O-acyltransferase 2	SOAT2_HUMAN|ACACT2|ACAT2	NCBITaxon:9606	20090209	BHF-UCL
O95477	ABCA1		GO:0034380	PMID:10431236	IMP		ATP-binding cassette sub-family A member 1	ABCA1_HUMAN|ABC1|CERP	NCBITaxon:9606	20090512	BHF-UCL
O95477	ABCA1		GO:0034380	PMID:17305370	IMP		ATP-binding cassette sub-family A member 1	ABCA1_HUMAN|ABC1|CERP	NCBITaxon:9606	20090512	BHF-UCL
P11597	CETP		GO:0034372	PMID:24293641	IDA		Cholesteryl ester transfer protein	CETP_HUMAN	NCBITaxon:9606	20141010	UniProt
P11597	CETP		GO:0034372	PMID:2833496	IDA		Cholesteryl ester transfer protein	CETP_HUMAN	NCBITaxon:9606	20080509	BHF-UCL
P11597	CETP		GO:0034374	PMID:2833496	IDA		Cholesteryl ester transfer protein	CETP_HUMAN	NCBITaxon:9606	20080509	BHF-UCL
P11597	CETP		GO:0034375	PMID:24293641	IDA		Cholesteryl ester transfer protein	CETP_HUMAN	NCBITaxon:9606	20141010	UniProt
P11597	CETP		GO:0034375	PMID:2586614	IMP		Cholesteryl ester transfer protein	CETP_HUMAN	NCBITaxon:9606	20080509	BHF-UCL
P06858	LPL		GO:0034371	PMID:3973011	IC	GO:0004465	Lipoprotein lipase	LIPL_HUMAN|LIPD	NCBITaxon:9606	20090521	BHF-UCL
P06858	LPL		GO:0034372	GO_REF:0000024	ISS	UniProtKB:P11151	Lipoprotein lipase	LIPL_HUMAN|LIPD	NCBITaxon:9606	20090218	BHF-UCL
P06858	LPL		GO:0034372	PMID:3973011	IDA		Lipoprotein lipase	LIPL_HUMAN|LIPD	NCBITaxon:9606	20090515	BHF-UCL
P04114	APOB		GO:0034374	PMID:15797858	IMP		Apolipoprotein B-100	APOB_HUMAN	NCBITaxon:9606	20080801	BHF-UCL
P04114	APOB		GO:0034379	PMID:15308631	IC	GO:0034361	Apolipoprotein B-100	APOB_HUMAN	NCBITaxon:9606	20090209	BHF-UCL
Q8WWZ7	ABCA5		GO:0034375	PMID:20382126	ISS	UniProtKB:Q8K448	ATP-binding cassette sub-family A member 5	ABCA5_HUMAN|KIAA1888	NCBITaxon:9606	20100601	BHF-UCL
Q8IZY2	ABCA7		GO:0034380	PMID:14570867	IDA		ATP-binding cassette sub-family A member 7	ABCA7_HUMAN	NCBITaxon:9606	20140409	Alzheimers_University_of_Toronto
Q8WTV0	SCARB1		GO:0034375	GO_REF:0000024	ISS	UniProtKB:Q61009	Scavenger receptor class B member 1	SCRB1_HUMAN|CD36L1|CLA1	NCBITaxon:9606	20090508	BHF-UCL
Q13093	PLA2G7		GO:0034374	PMID:8624782	IDA		Platelet-activating factor acetylhydrolase	PAFA_HUMAN|PAFAH	NCBITaxon:9606	20110708	BHF-UCL
Q13093	PLA2G7		GO:0046469	PMID:8624782	IDA		Platelet-activating factor acetylhydrolase	PAFA_HUMAN|PAFAH	NCBITaxon:9606	20160729	BHF-UCL
P02656	APOC3		GO:0034375	PMID:17438339	IMP		Apolipoprotein C-III	APOC3_HUMAN	NCBITaxon:9606	20080509	BHF-UCL
P02656	APOC3		GO:0034379	PMID:18399797	TAS		Apolipoprotein C-III	APOC3_HUMAN	NCBITaxon:9606	20090515	BHF-UCL
P02655	APOC2		GO:0034370	PMID:17018885	TAS		Apolipoprotein C-II	APOC2_HUMAN|APC2	NCBITaxon:9606	20090528	BHF-UCL
P02655	APOC2		GO:0034371	PMID:10727238	IC	GO:0051006	Apolipoprotein C-II	APOC2_HUMAN|APC2	NCBITaxon:9606	20090521	BHF-UCL
P02655	APOC2		GO:0034372	PMID:15778093	TAS		Apolipoprotein C-II	APOC2_HUMAN|APC2	NCBITaxon:9606	20090515	BHF-UCL
P02654	APOC1		GO:0034375	PMID:18992221	TAS		Apolipoprotein C-I	APOC1_HUMAN	NCBITaxon:9606	20090206	BHF-UCL
P02654	APOC1		GO:0034379	PMID:18992221	TAS		Apolipoprotein C-I	APOC1_HUMAN	NCBITaxon:9606	20090205	BHF-UCL
P02652	APOA2		GO:0034370	PMID:14967812	IDA		Apolipoprotein A-II	APOA2_HUMAN	NCBITaxon:9606	20080719	BHF-UCL
P02652	APOA2		GO:0034374	PMID:8106353	IDA		Apolipoprotein A-II	APOA2_HUMAN	NCBITaxon:9606	20090514	BHF-UCL
P02652	APOA2		GO:0034375	PMID:14967812	IDA		Apolipoprotein A-II	APOA2_HUMAN	NCBITaxon:9606	20090514	BHF-UCL
P02652	APOA2		GO:0034375	PMID:8106353	IDA		Apolipoprotein A-II	APOA2_HUMAN	NCBITaxon:9606	20090514	BHF-UCL
P02652	APOA2		GO:0034380	PMID:218942	IDA		Apolipoprotein A-II	APOA2_HUMAN	NCBITaxon:9606	20090205	BHF-UCL
P02649	APOE		GO:0034372	PMID:12401887	IGI	UniProtKB:P08226	Apolipoprotein E	APOE_HUMAN	NCBITaxon:9606	20090511	BHF-UCL
P02649	APOE		GO:0034372	PMID:15654758	IDA		Apolipoprotein E	APOE_HUMAN	NCBITaxon:9606	20090526	BHF-UCL
P02649	APOE		GO:0034374	GO_REF:0000019	IEA	Ensembl:ENSMUSP00000133302	Apolipoprotein E	APOE_HUMAN	NCBITaxon:9606	20161001	Ensembl
P02649	APOE		GO:0034375	PMID:12401887	IGI	UniProtKB:P08226	Apolipoprotein E	APOE_HUMAN	NCBITaxon:9606	20090511	BHF-UCL
P02649	APOE		GO:0034380	PMID:17305370	IDA		Apolipoprotein E	APOE_HUMAN	NCBITaxon:9606	20090512	BHF-UCL
P02647	APOA1		GO:0034375	PMID:21481393	IDA		Apolipoprotein A-I	APOA1_HUMAN	NCBITaxon:9606	20150422	BHF-UCL
P02647	APOA1		GO:0034375	PMID:4335615	IC	GO:0060228	Apolipoprotein A-I	APOA1_HUMAN	NCBITaxon:9606	20091123	BHF-UCL
P02647	APOA1		GO:0034380	PMID:190223	IDA		Apolipoprotein A-I	APOA1_HUMAN	NCBITaxon:9606	20090205	BHF-UCL
P14555	PLA2G2A		GO:0034374	PMID:18827909	TAS		Phospholipase A2
P05164	MPO		GO:0034374	PMID:10772654	IDA		Myeloperoxidase	PERM_HUMAN	NCBITaxon:9606	20090114	BHF-UCL
P55157	MTTP		GO:0034377	PMID:23475612	IDA		Microsomal triglyceride transfer protein large subunit	MTP_HUMAN|MTP	NCBITaxon:9606	20150925	UniProt
P55157	MTTP		GO:0034377	PMID:26224785	IDA		Microsomal triglyceride transfer protein large subunit	MTP_HUMAN|MTP	NCBITaxon:9606	20150925	UniProt
P01019	AGT		GO:0034374	PMID:17069818	NAS		Angiotensinogen	ANGT_HUMAN|SERPINA8	NCBITaxon:9606	20090115	BHF-UCL
P11150	LIPC		GO:0034372	PMID:8640403	IDA		Hepatic triacylglycerol lipase	LIPC_HUMAN|HTGL	NCBITaxon:9606	20090514	BHF-UCL
P11150	LIPC		GO:0034373	PMID:2839510	TAS		Hepatic triacylglycerol lipase	LIPC_HUMAN|HTGL	NCBITaxon:9606	20090210	BHF-UCL
P11150	LIPC		GO:0034374	PMID:3244012	IMP		Hepatic triacylglycerol lipase	LIPC_HUMAN|HTGL	NCBITaxon:9606	20090508	BHF-UCL
P11150	LIPC		GO:0034375	PMID:3244012	IMP		Hepatic triacylglycerol lipase	LIPC_HUMAN|HTGL	NCBITaxon:9606	20090508	BHF-UCL
Q6Q788	APOA5		GO:0034370	GO_REF:0000019	IEA	Ensembl:ENSMUSP00000113413	Apolipoprotein A-V	APOA5_HUMAN|RAP3|UNQ411/PRO773	NCBITaxon:9606	20161001	Ensembl
Q6Q788	APOA5		GO:0034380	GO_REF:0000033	IBA	PANTHER:PTN000439006	Apolipoprotein A-V	APOA5_HUMAN|RAP3|UNQ411/PRO773	NCBITaxon:9606	20141124	GO_Central
Q9Y5X9	LIPG		GO:0034375	PMID:19136670	IMP		Endothelial lipase	LIPE_HUMAN|UNQ387/PRO719	NCBITaxon:9606	20090508	BHF-UCL
P04180	LCAT		GO:0034372	PMID:15654758	IDA		Phosphatidylcholine-sterol acyltransferase	LCAT_HUMAN	NCBITaxon:9606	20090526	BHF-UCL
P04180	LCAT		GO:0034375	PMID:10722751	IDA		Phosphatidylcholine-sterol acyltransferase	LCAT_HUMAN	NCBITaxon:9606	20110815	UniProt
P04180	LCAT		GO:0034375	PMID:12167653	IDA		Phosphatidylcholine-sterol acyltransferase	LCAT_HUMAN	NCBITaxon:9606	20090205	BHF-UCL
P04180	LCAT		GO:0034375	PMID:15210842	IDA		Phosphatidylcholine-sterol acyltransferase	LCAT_HUMAN	NCBITaxon:9606	20090508	BHF-UCL
P04180	LCAT		GO:0034375	PMID:4335615	IDA		Phosphatidylcholine-sterol acyltransferase	LCAT_HUMAN	NCBITaxon:9606	20090511	BHF-UCL
P35610	SOAT1		GO:0034379	PMID:15308631	IMP		Sterol O-acyltransferase 1	SOAT1_HUMAN|ACACT|ACACT1|ACAT|ACAT1|SOAT|STAT	NCBITaxon:9606	20090209	BHF-UCL
P45844	ABCG1		GO:0034374	PMID:16556852	ISS	UniProtKB:Q64343	ATP-binding cassette sub-family G member 1	ABCG1_HUMAN|ABC8|WHT1	NCBITaxon:9606	20090527	BHF-UCL
P45844	ABCG1		GO:0034375	PMID:16556852	ISS	UniProtKB:Q64343	ATP-binding cassette sub-family G member 1	ABCG1_HUMAN|ABC8|WHT1	NCBITaxon:9606	20090527	BHF-UCL
P06727	APOA4		GO:0034371	PMID:2307668	IC	GO:0051006	Apolipoprotein A-IV	APOA4_HUMAN	NCBITaxon:9606	20090521	BHF-UCL
P06727	APOA4		GO:0034372	PMID:2307668	IDA		Apolipoprotein A-IV	APOA4_HUMAN	NCBITaxon:9606	20090521	BHF-UCL
P06727	APOA4		GO:0034375	PMID:1935934	IC	GO:0060228	Apolipoprotein A-IV	APOA4_HUMAN	NCBITaxon:9606	20090514	BHF-UCL
P06727	APOA4		GO:0034378	PMID:16159879	TAS		Apolipoprotein A-IV	APOA4_HUMAN	NCBITaxon:9606	20090514	BHF-UCL
P06727	APOA4		GO:0034380	GO_REF:0000033	IBA	PANTHER:PTN000439006	Apolipoprotein A-IV	APOA4_HUMAN	NCBITaxon:9606	20141124	GO_Central
P55058	PLTP		GO:0034375	PMID:24369175	IDA		Phospholipid transfer protein	PLTP_HUMAN	NCBITaxon:9606	20150108	AgBase
O75907	DGAT1		GO:0034379	PMID:15308631	IMP		Diacylglycerol O-acyltransferase 1	DGAT1_HUMAN|AGRP1|DGAT	NCBITaxon:9606	20090209	BHF-UCL
O95573	ACSL3		GO:0034379	PMID:18003621	IMP		Long-chain-fatty-acid--CoA ligase 3	ACSL3_HUMAN|ACS3|FACL3|LACS3	NCBITaxon:9606	20121022	UniProt
O95477	ABCA1		GO:0090107	PMID:24097981	TAS		ATP-binding cassette sub-family A member 1	ABCA1_HUMAN|ABC1|CERP	NCBITaxon:9606	20160721	BHF-UCL
P04180	LCAT		GO:0090107	GO_REF:0000019	IEA	Ensembl:ENSMUSP00000038232	Phosphatidylcholine-sterol acyltransferase	LCAT_HUMAN	NCBITaxon:9606	20161001	Ensembl
P02656	APOC3		GO:0010903	PMID:18635818	IC	GO:0051005	Apolipoprotein C-III	APOC3_HUMAN	NCBITaxon:9606	20090424	BHF-UCL
P02656	APOC3		GO:0010903	PMID:3973011	IDA		Apolipoprotein C-III	APOC3_HUMAN	NCBITaxon:9606	20090515	BHF-UCL
P02655	APOC2		GO:0010902	PMID:10727238	IC	GO:0051006	Apolipoprotein C-II	APOC2_HUMAN|APC2	NCBITaxon:9606	20090528	BHF-UCL
P02652	APOA2		GO:0010903	PMID:14967812	IDA		Apolipoprotein A-II	APOA2_HUMAN	NCBITaxon:9606	20090514	BHF-UCL
P02647	APOA1		GO:0010903	PMID:14967812	IDA		Apolipoprotein A-I	APOA1_HUMAN	NCBITaxon:9606	20090514	BHF-UCL
Q6Q788	APOA5		GO:0010902	PMID:18635818	IDA		Apolipoprotein A-V	APOA5_HUMAN|RAP3|UNQ411/PRO773	NCBITaxon:9606	20090424	BHF-UCL
P55055	NR1H2		GO:0090108	GO_REF:0000019	IEA	Ensembl:ENSMUSP00000073188	Oxysterols receptor LXR-beta	NR1H2_HUMAN|LXRB|NER|UNR	NCBITaxon:9606	20161001	Ensembl
